# Supplementary material for: Multiethnic GWAS Reveals Polygenic Architecture of Earlobe Attachment
Source: PubMed Central journal article supplement — Am J Hum Genet. 2017 Nov 30;101(6):913–24. doi: 10.1016/j.ajhg.2017.10.001 (PMC5812923; doi:10.1016/j.ajhg.2017.10.001), 2017-11-30
Supplement: mmc1.pdf [file mmc1.pdf]

## Supplemental Data

### Multiethnic GWAS Reveals Polygenic

#### Architecture of Earlobe Attachment

John R. Shaffer, Jinxi Li, Myoung Keun Lee, Jasmien Roosenboom, Ekaterina Orlova, Kaustabh Adhikari, 23andMe Research Team, Carla Gallo, Giovanni Poletti, Lavinia Schuler-Faccini, Maria-Cátira Bortolini, Samuel Canizales-Quinteros, Francisco Rothhammer, Gabriel Bedoya, Rolando González-José, Paige E. Pfeiffer, Christopher A. Wollenschlaeger, Jacqueline T. Hecht, George L. Wehby, Lina M. Moreno, Anan Ding, Li Jin, Yajun Yang, Jenna C. Carlson, Elizabeth J. Leslie, Eleanor Feingold, Mary L. Marazita, David A. Hinds, Timothy C. Cox, Sijia Wang, Andrés Ruiz-Linares, and Seth M. Weinberg

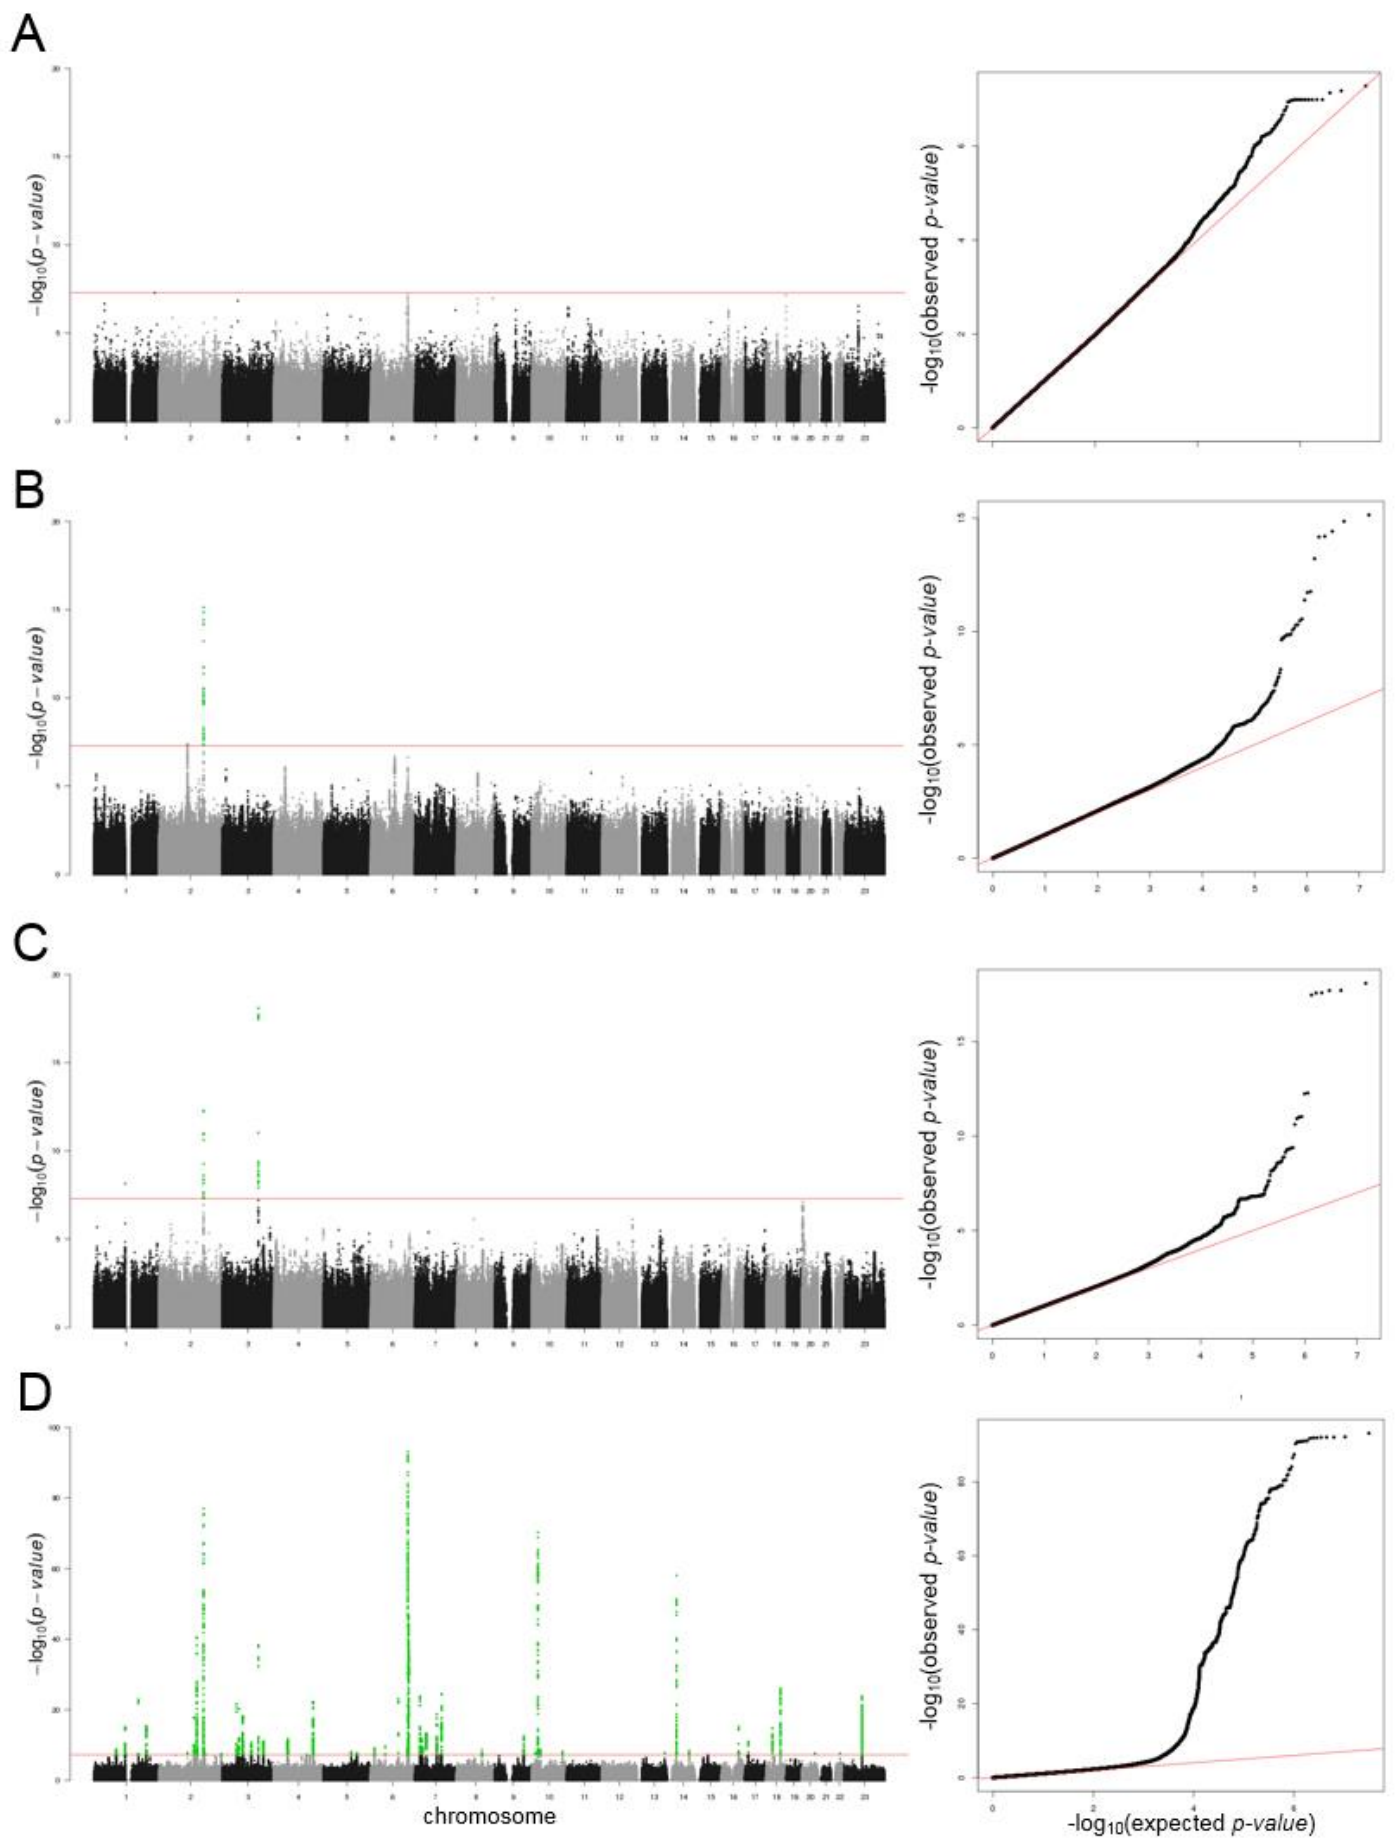

**Figure S1: GWAS results** shown as Manhattan (left) and quantile-quantile (right) plots for the (A) European American, (B) Latin American, (C) Chinese, and (D) 23andMe cohorts.

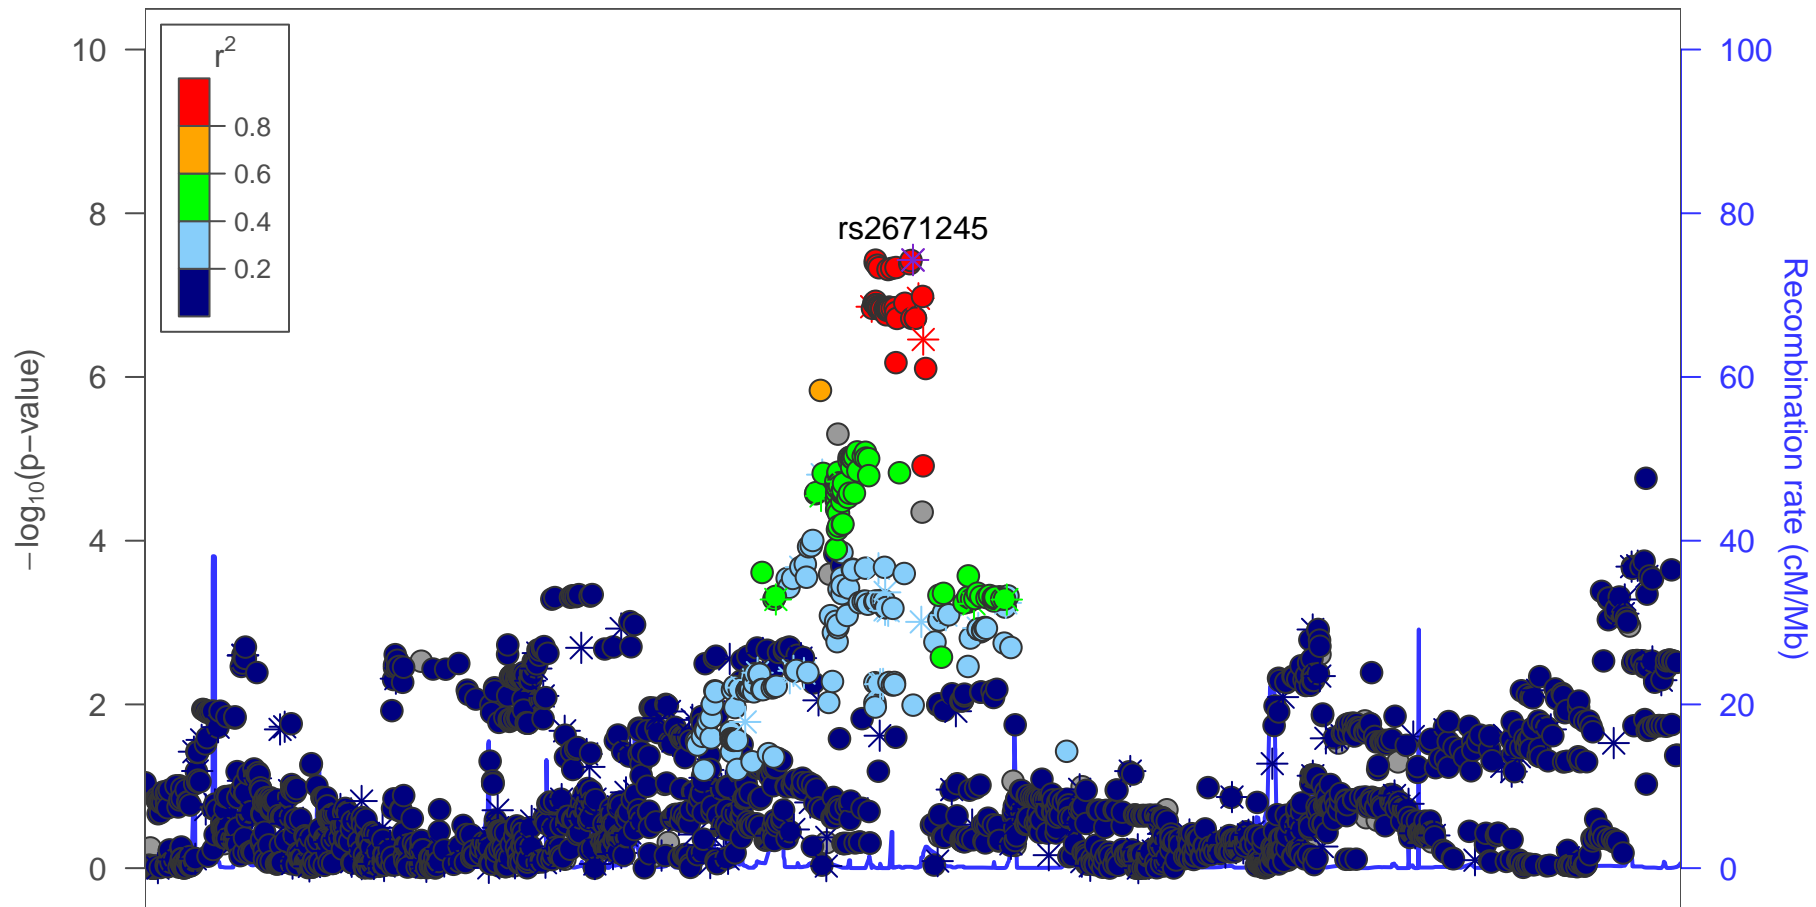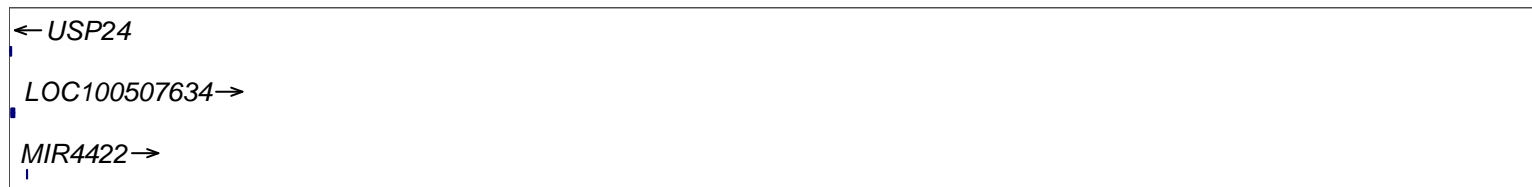

55.8

56

56.2

56.4

56.6

Position on chr1 (Mb)

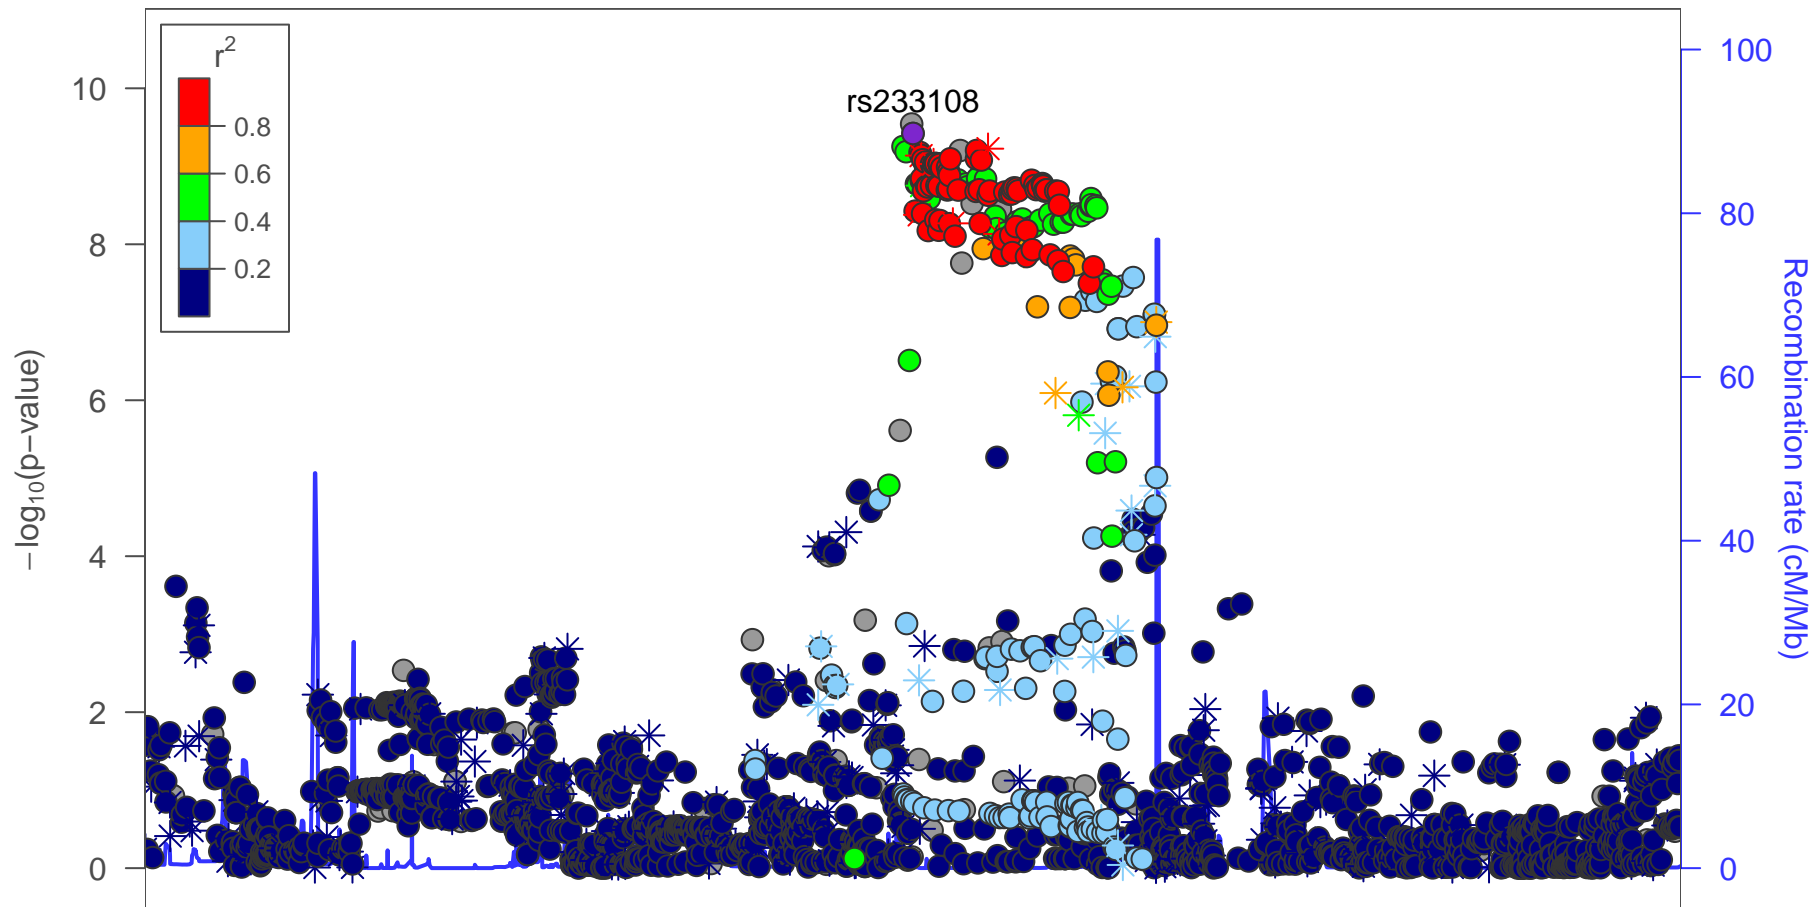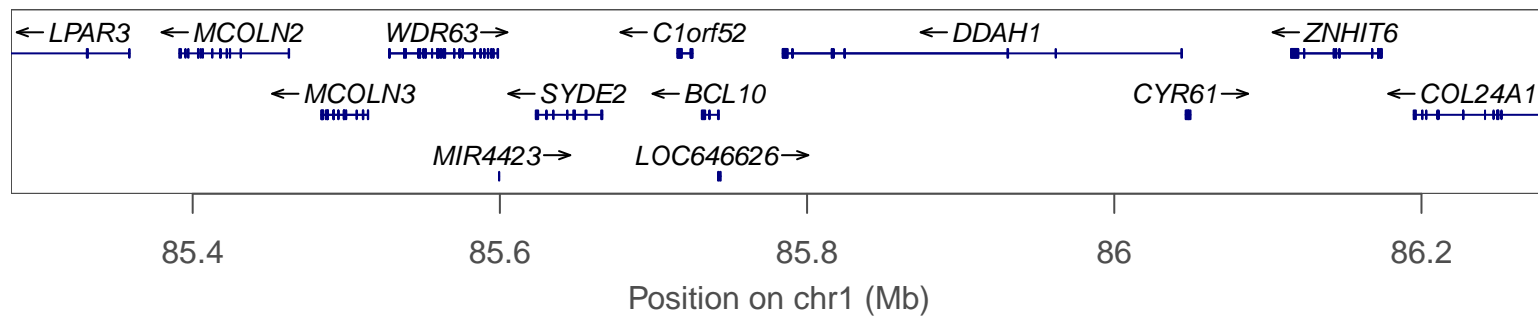

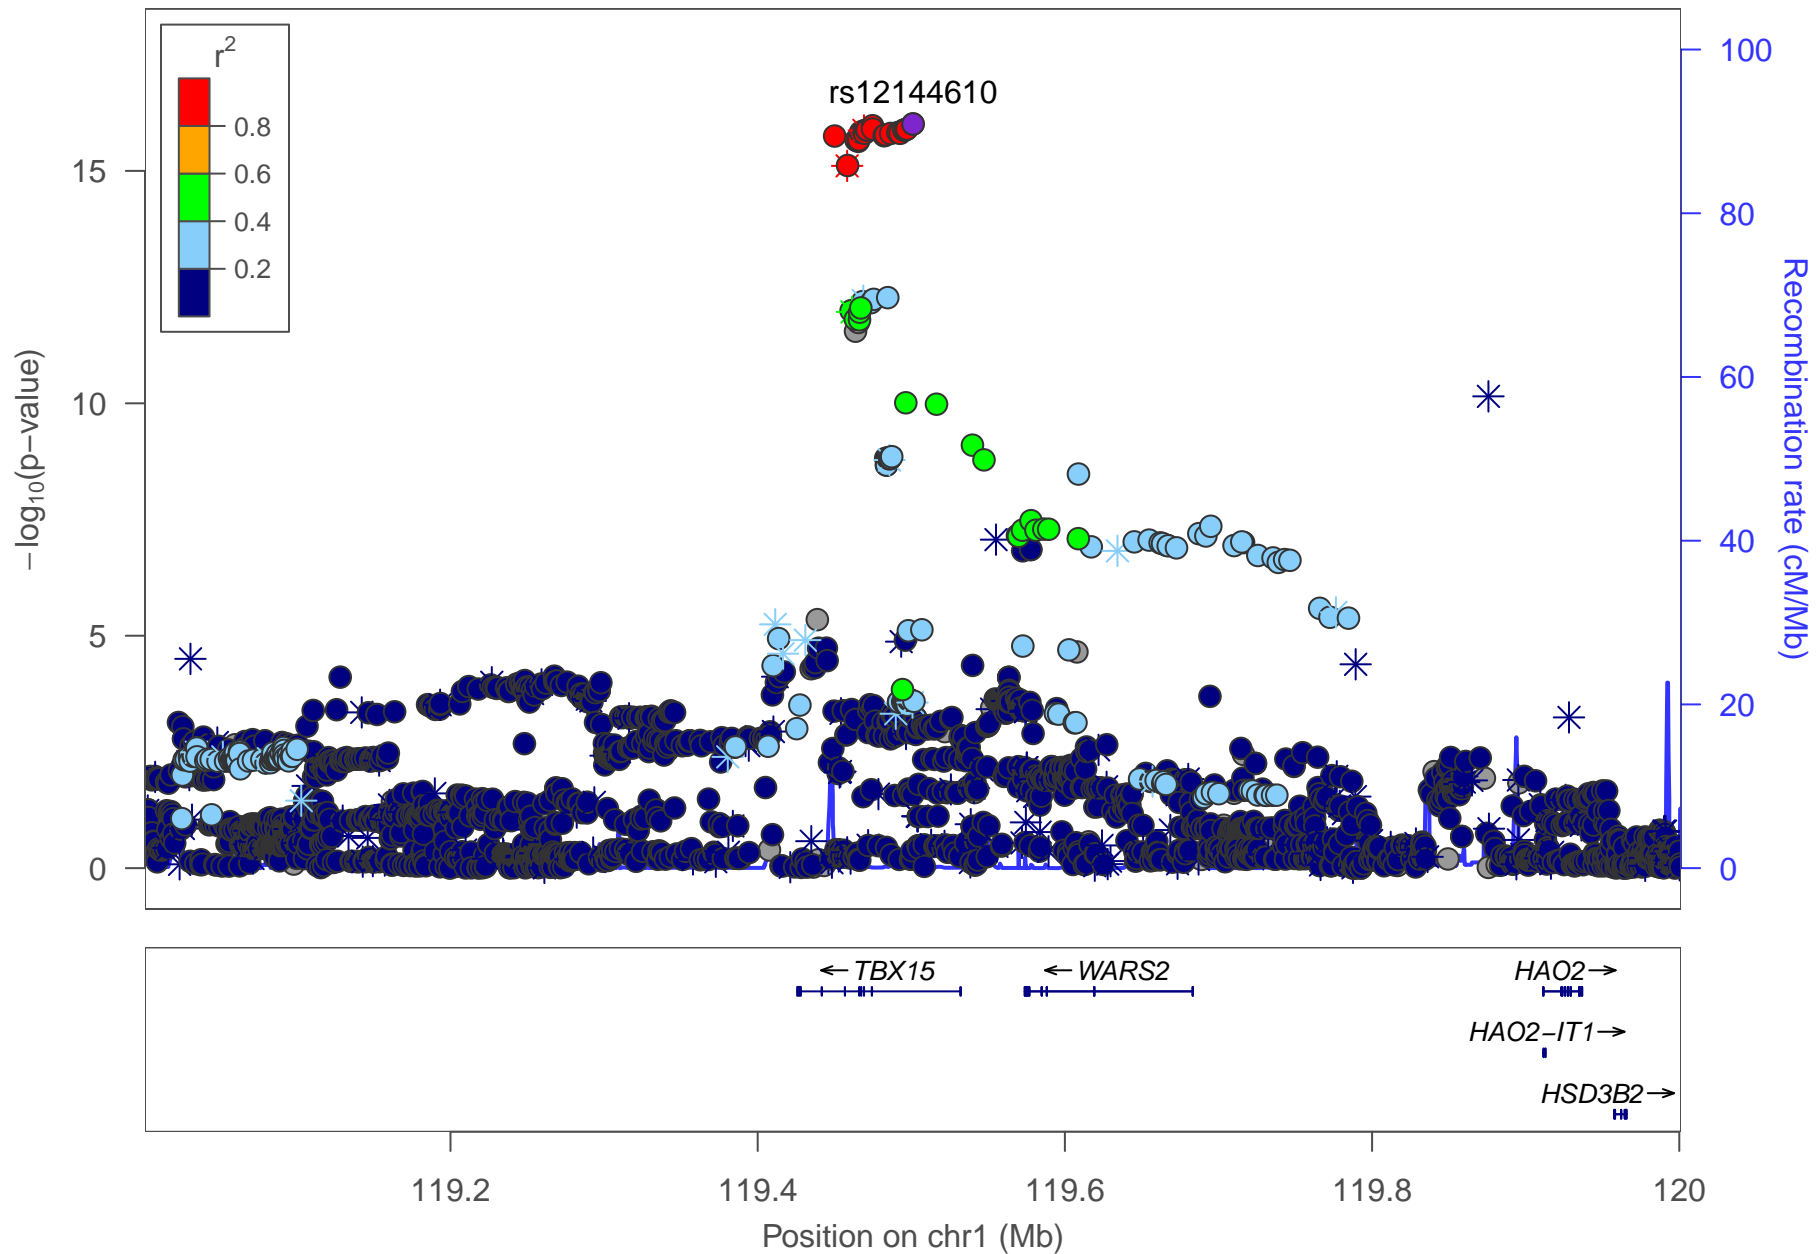

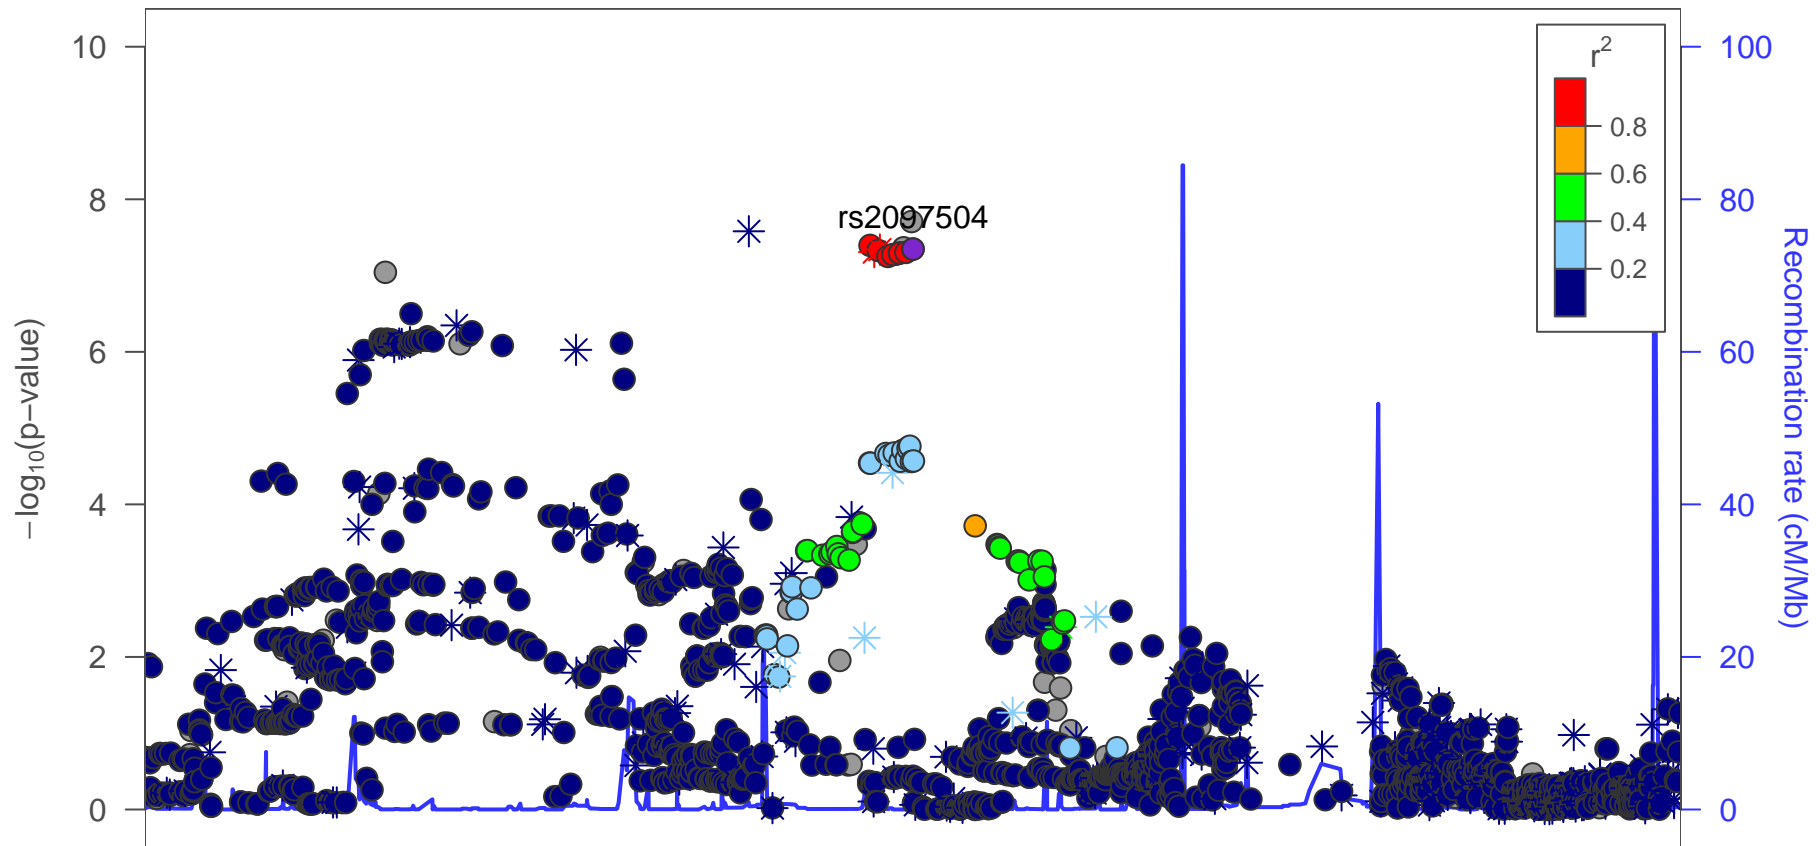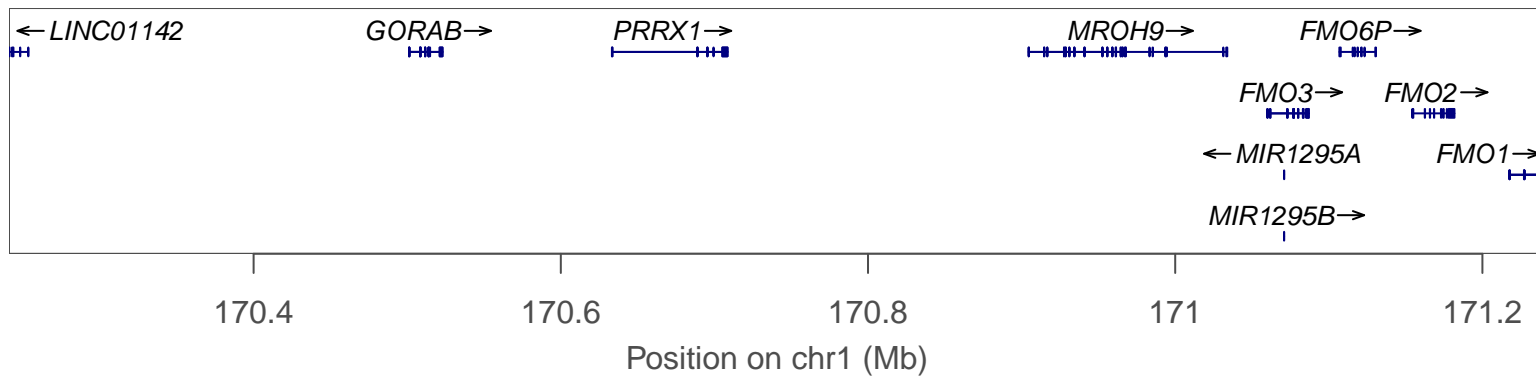

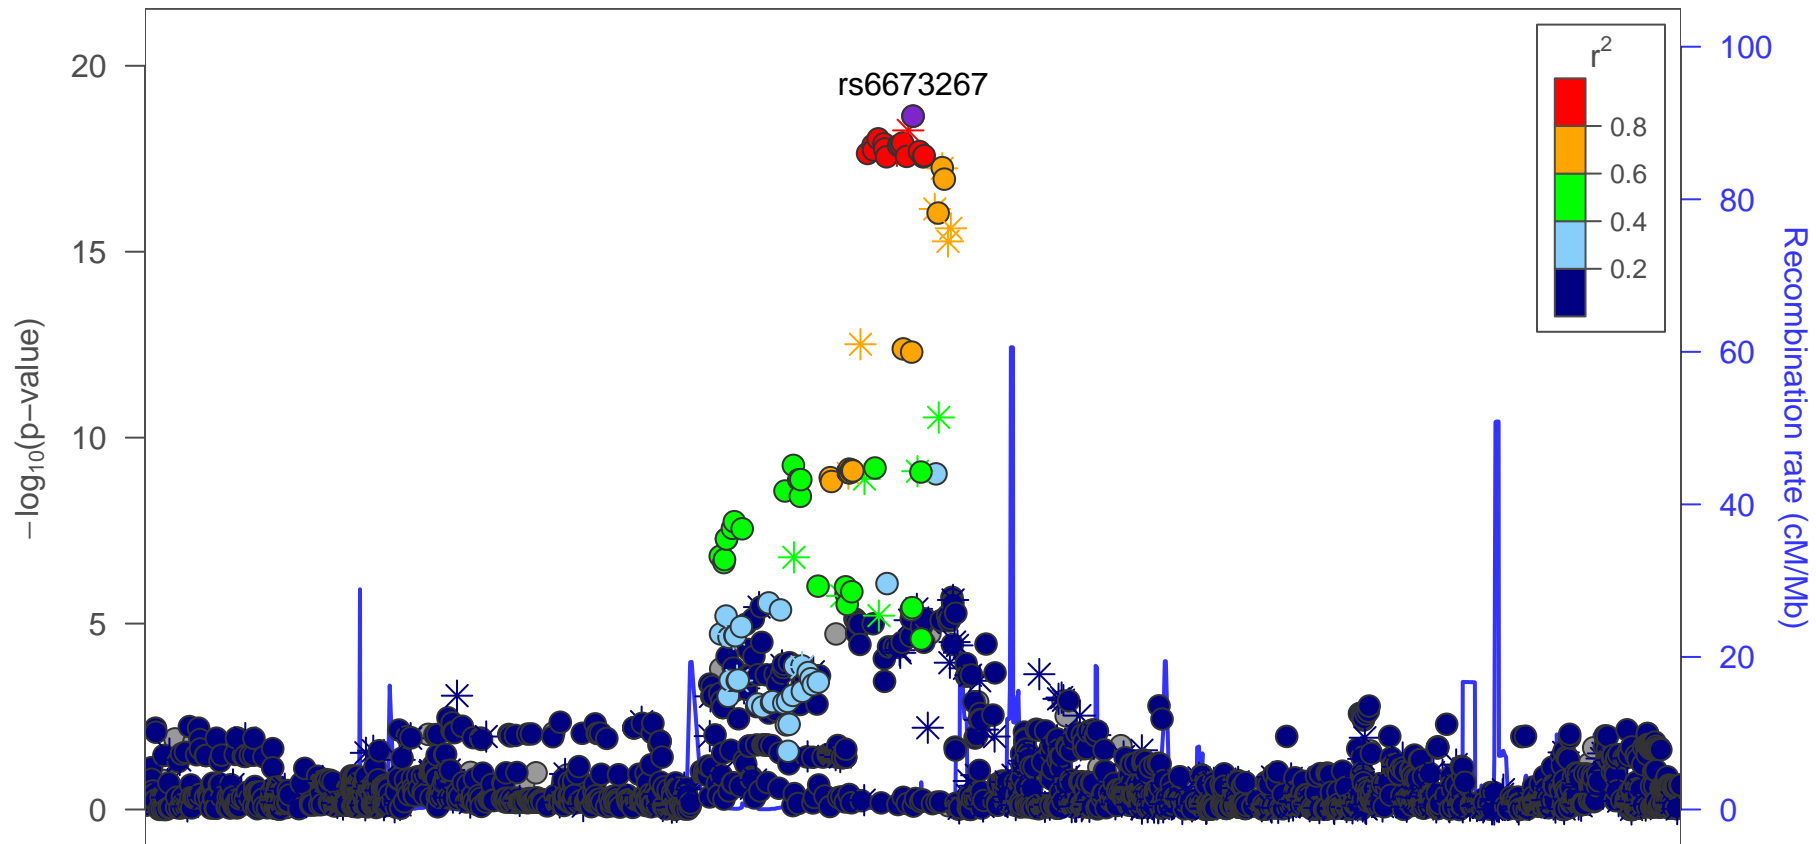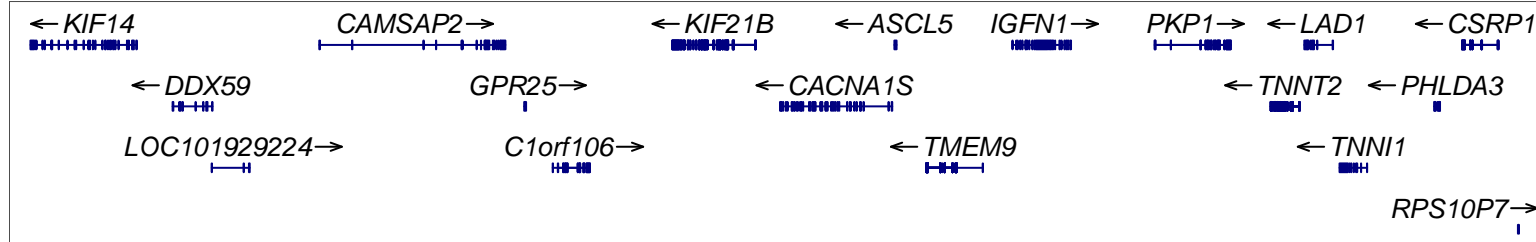

200.6                      200.8                      201                      201.2                      201.4

Position on chr1 (Mb)

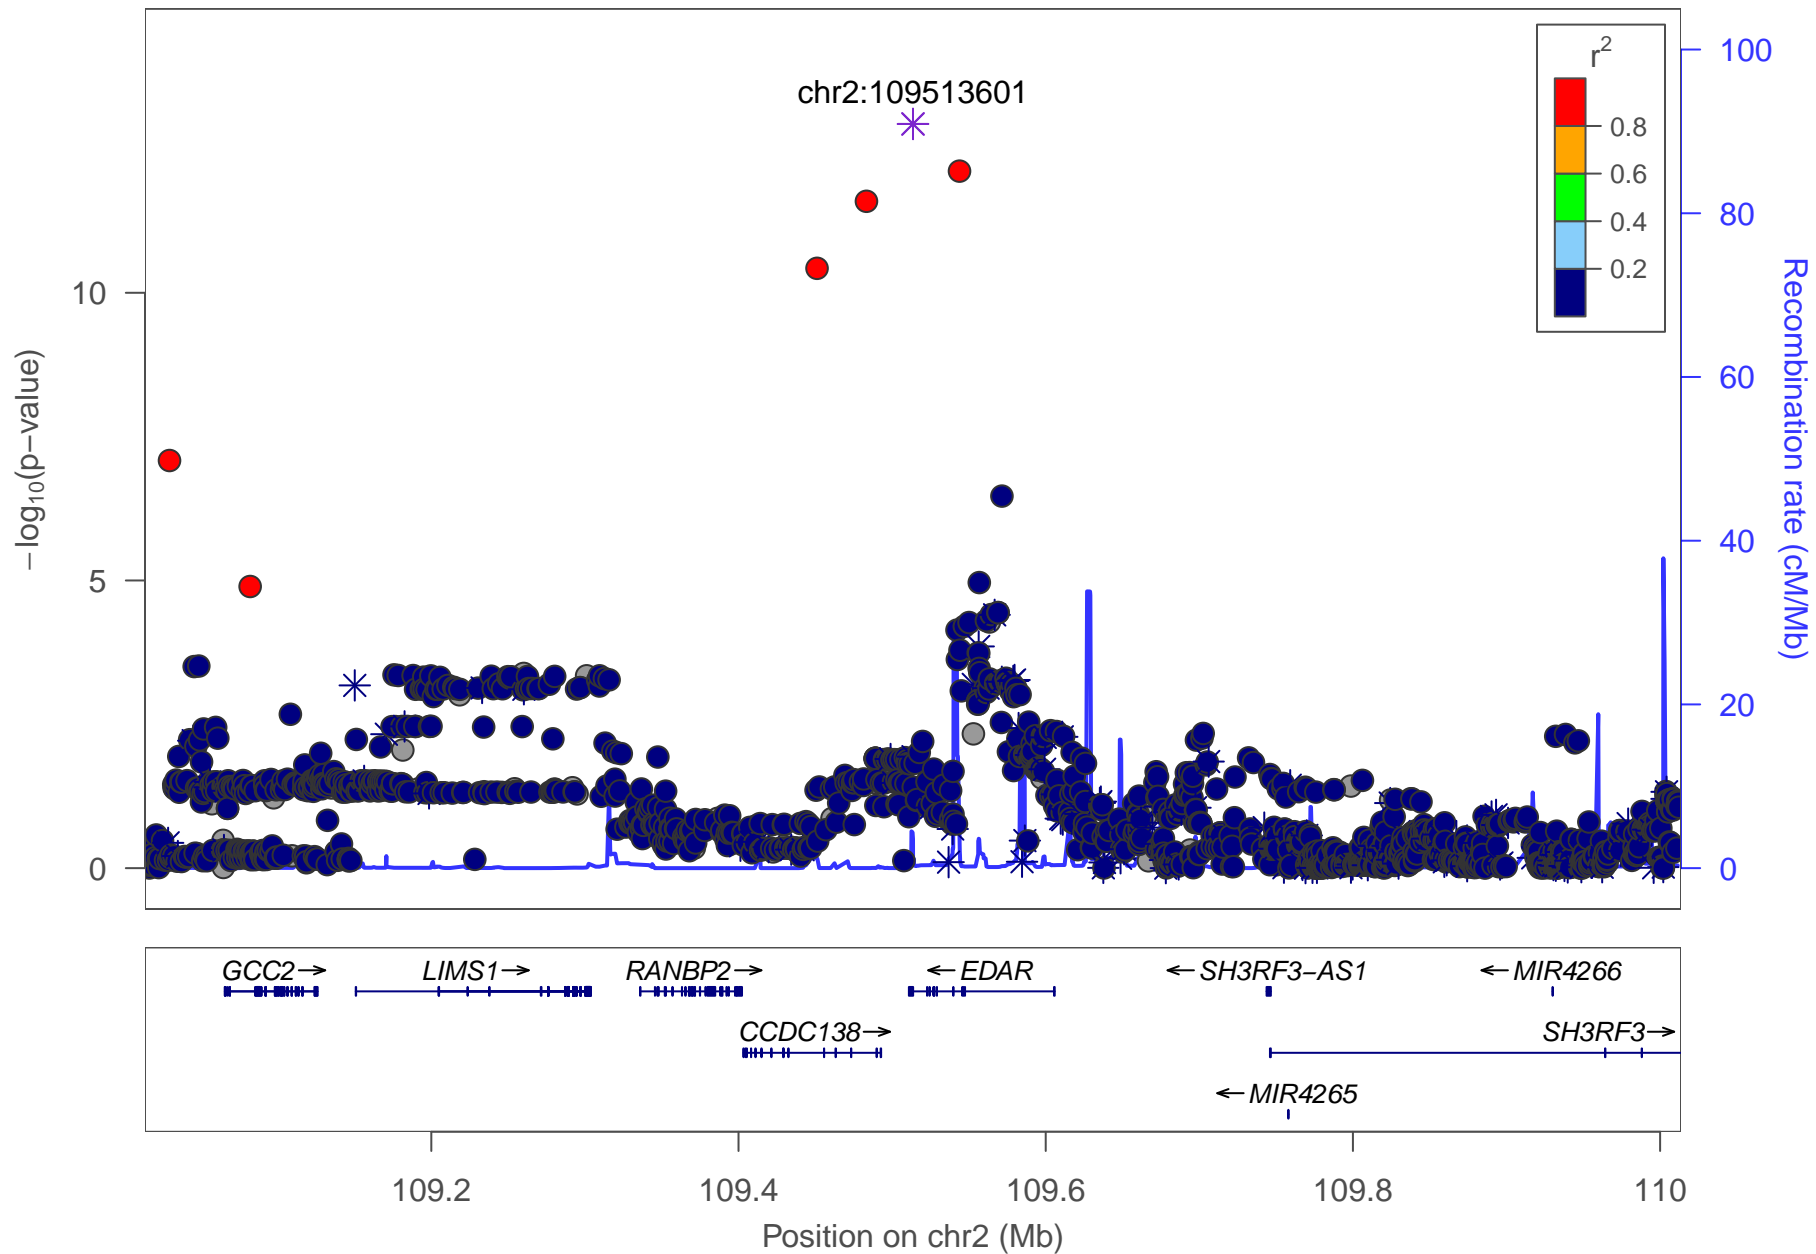



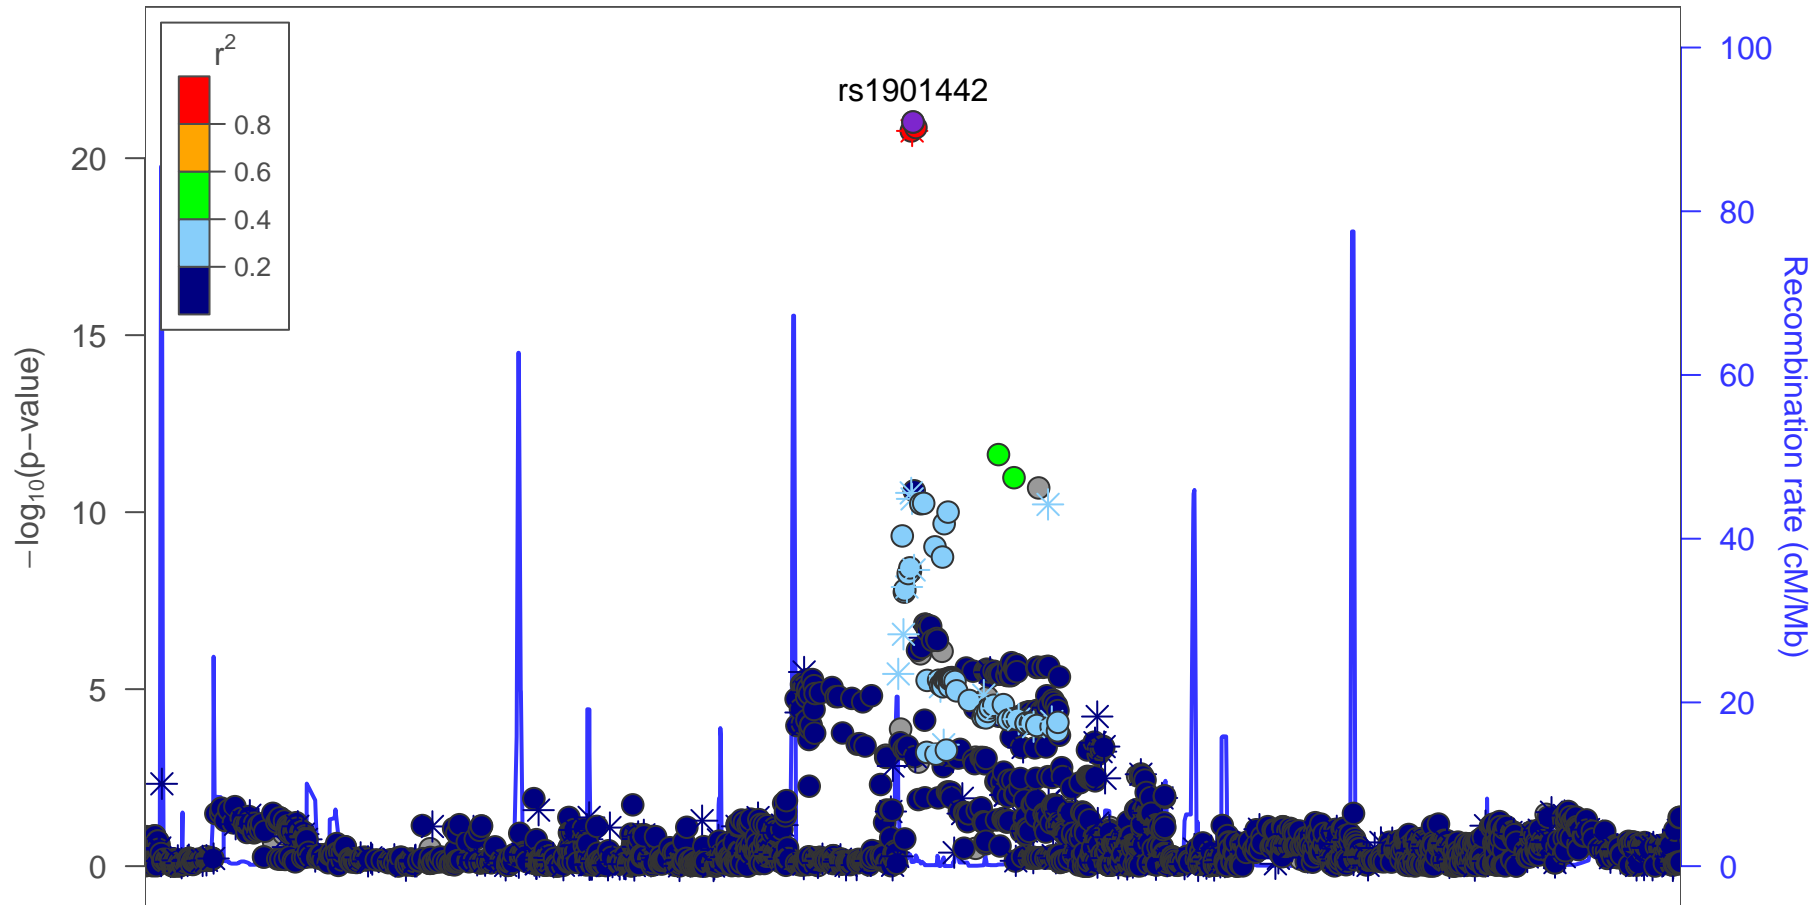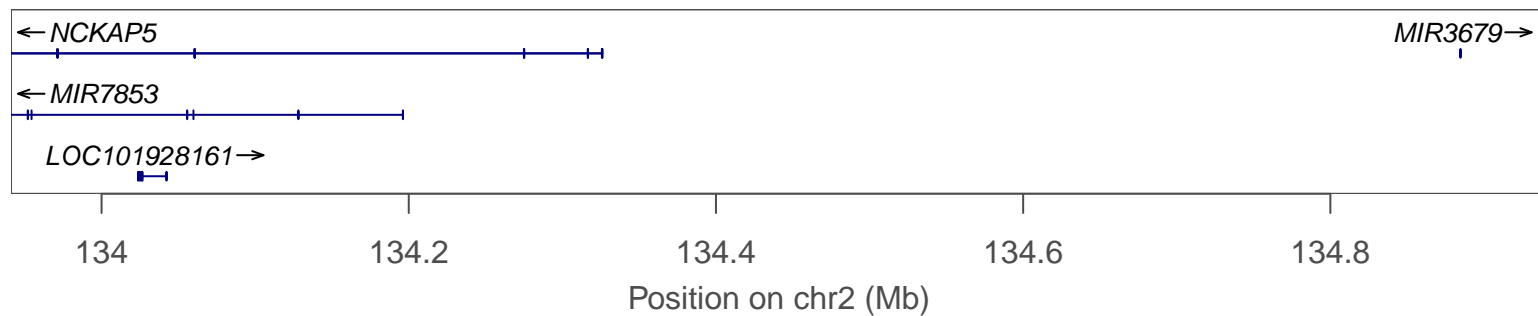

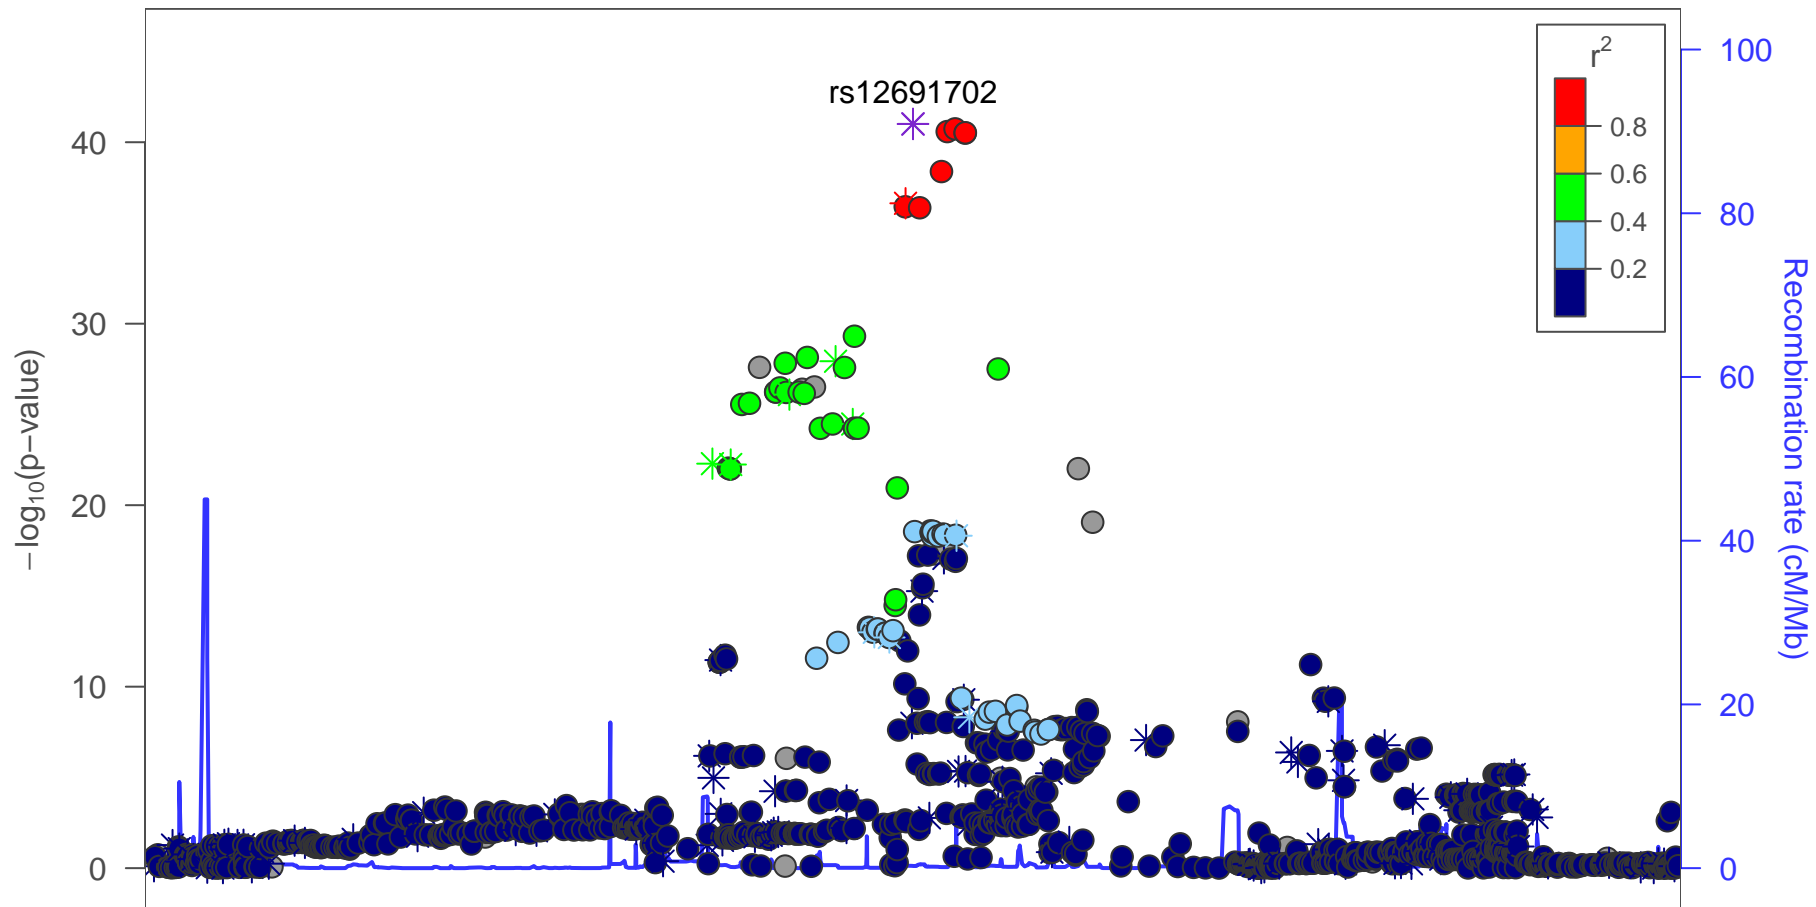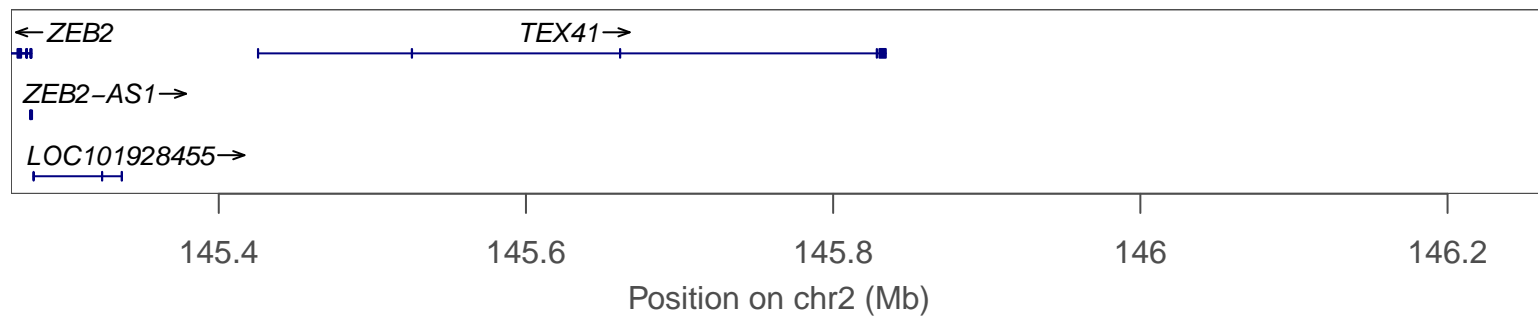

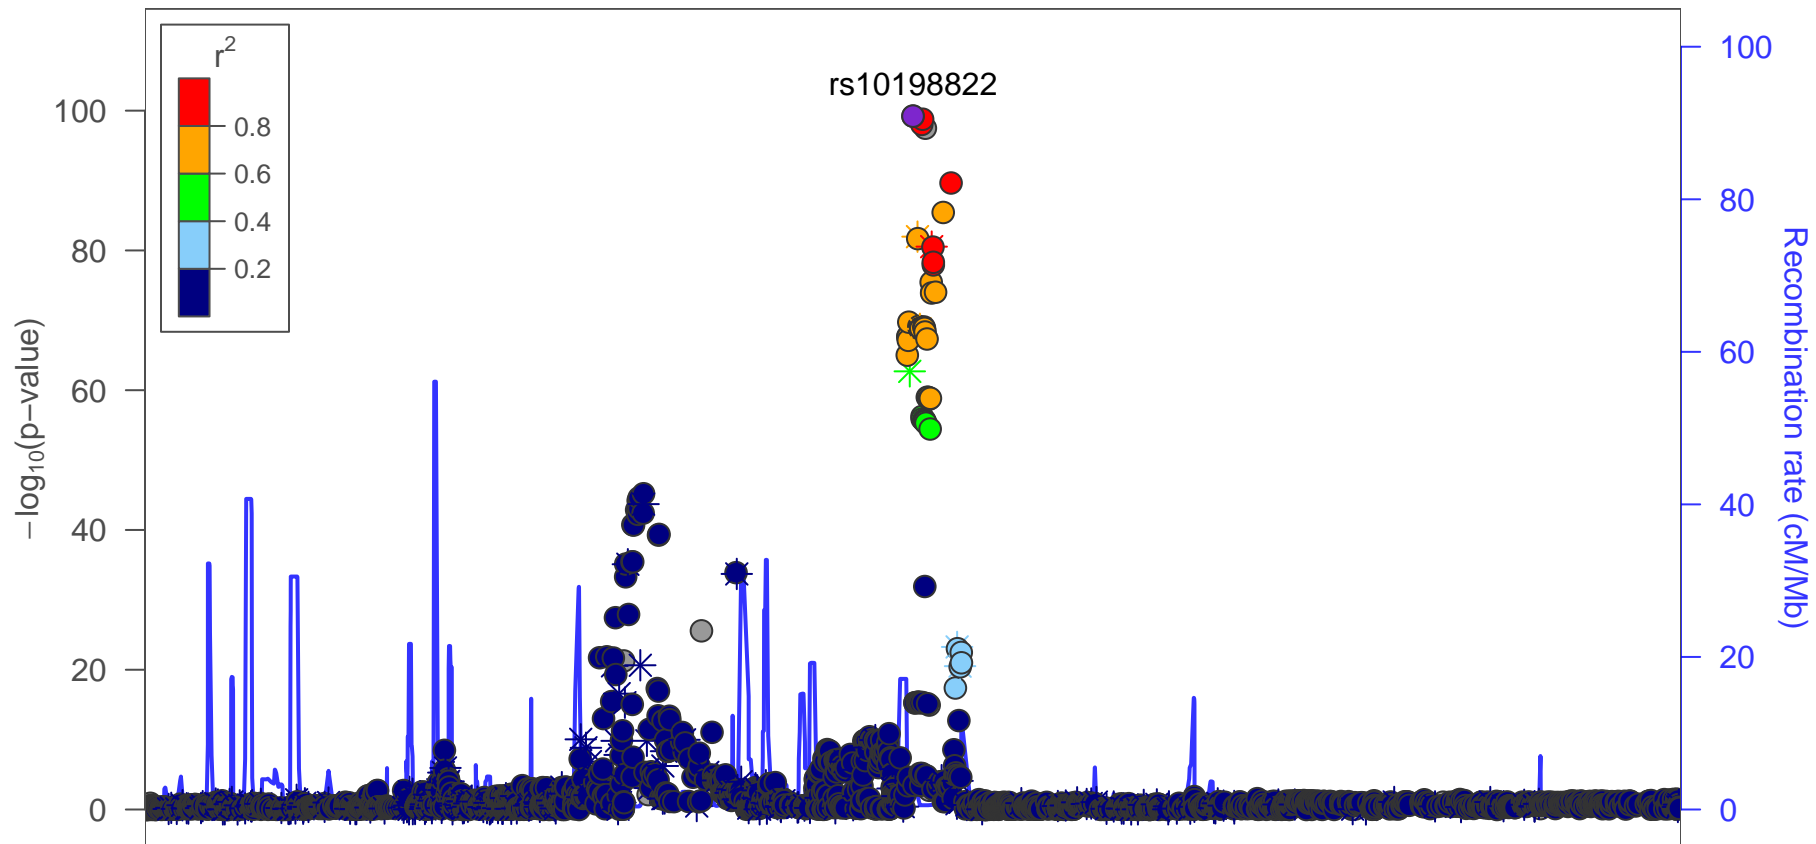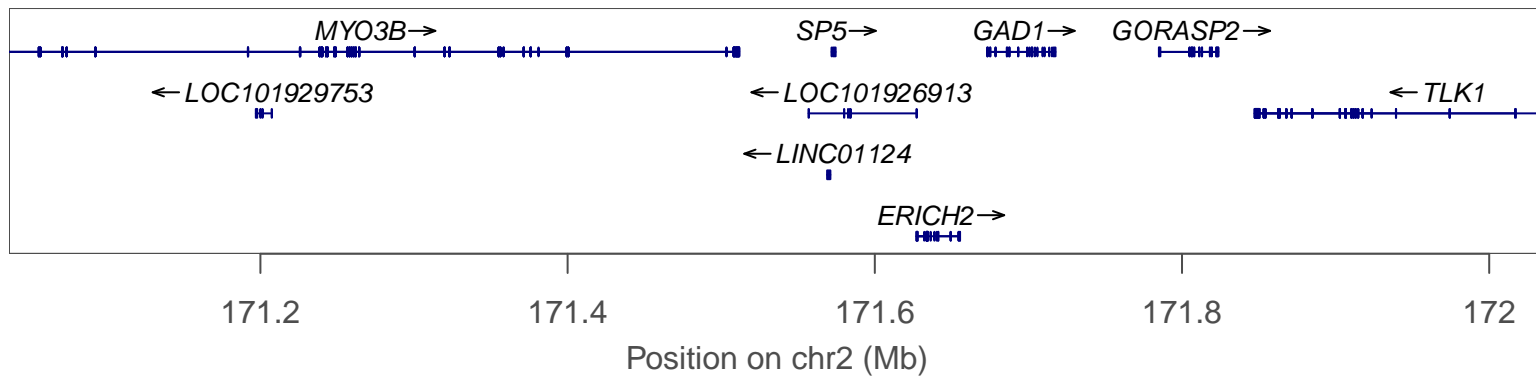

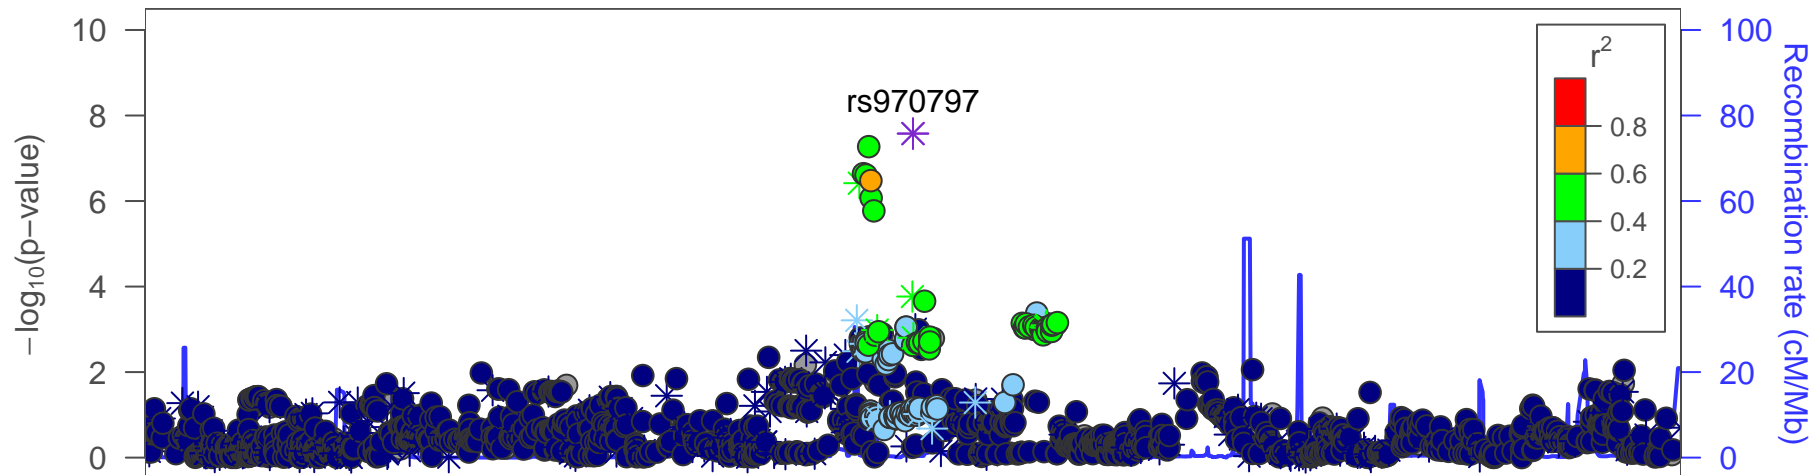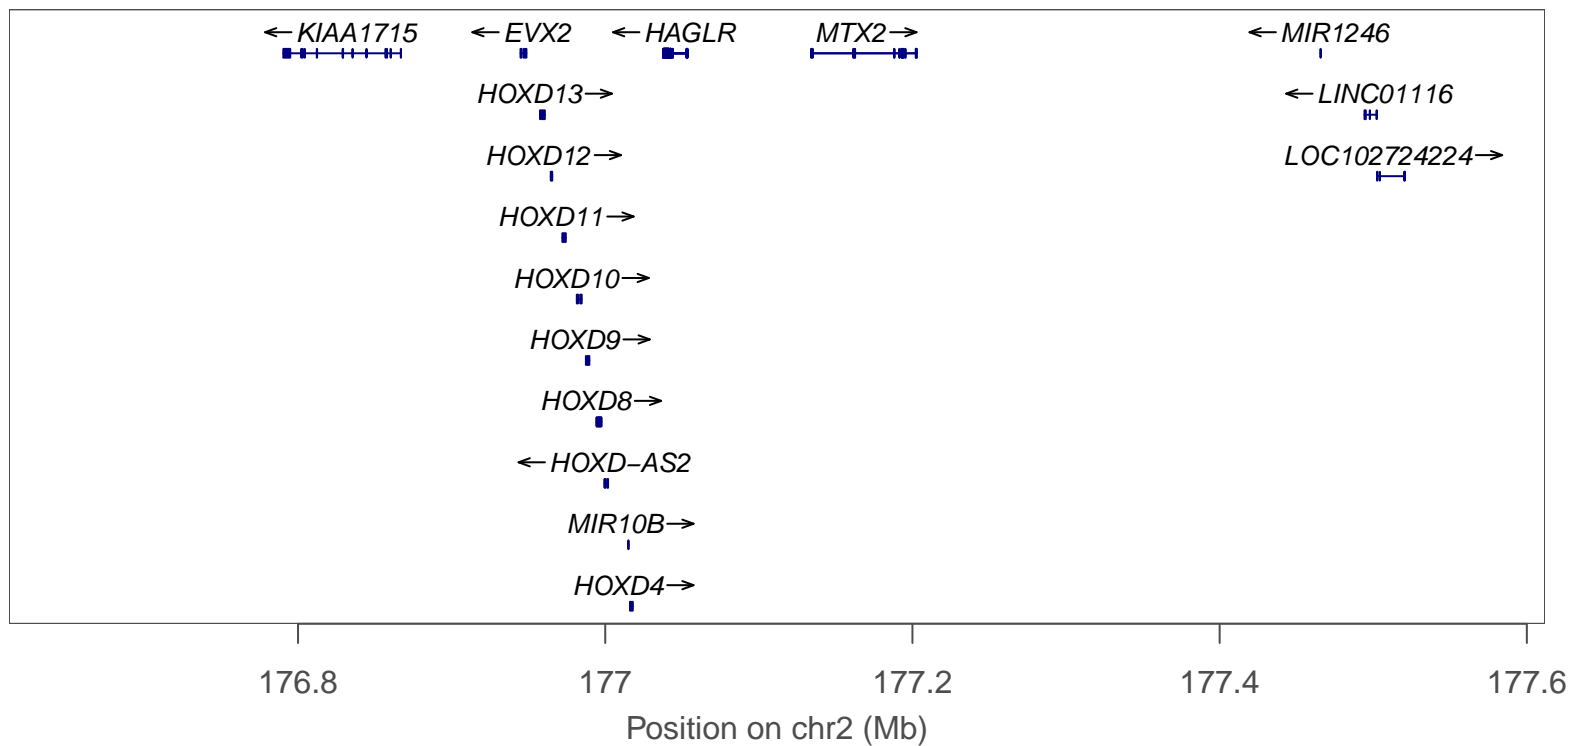

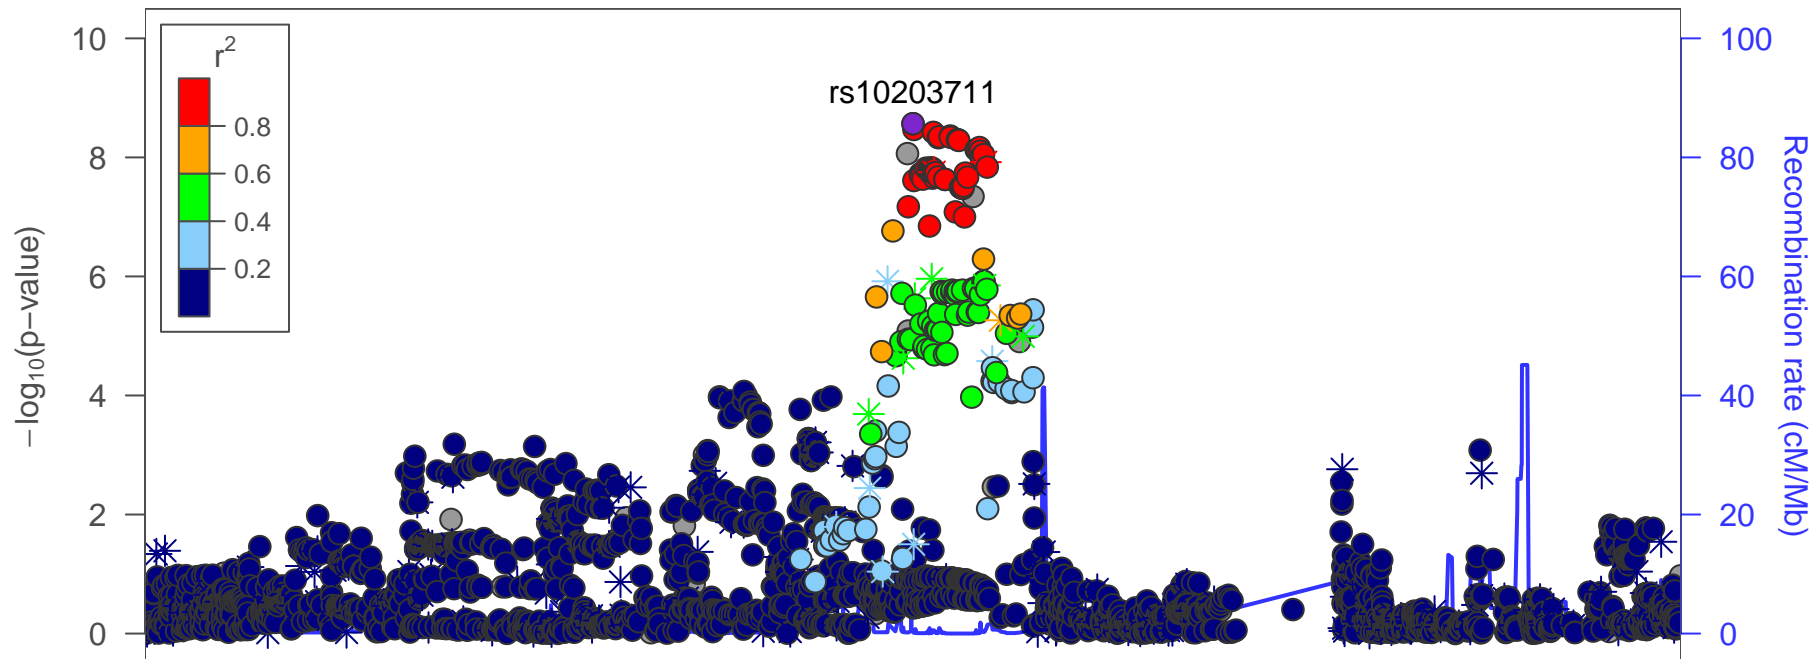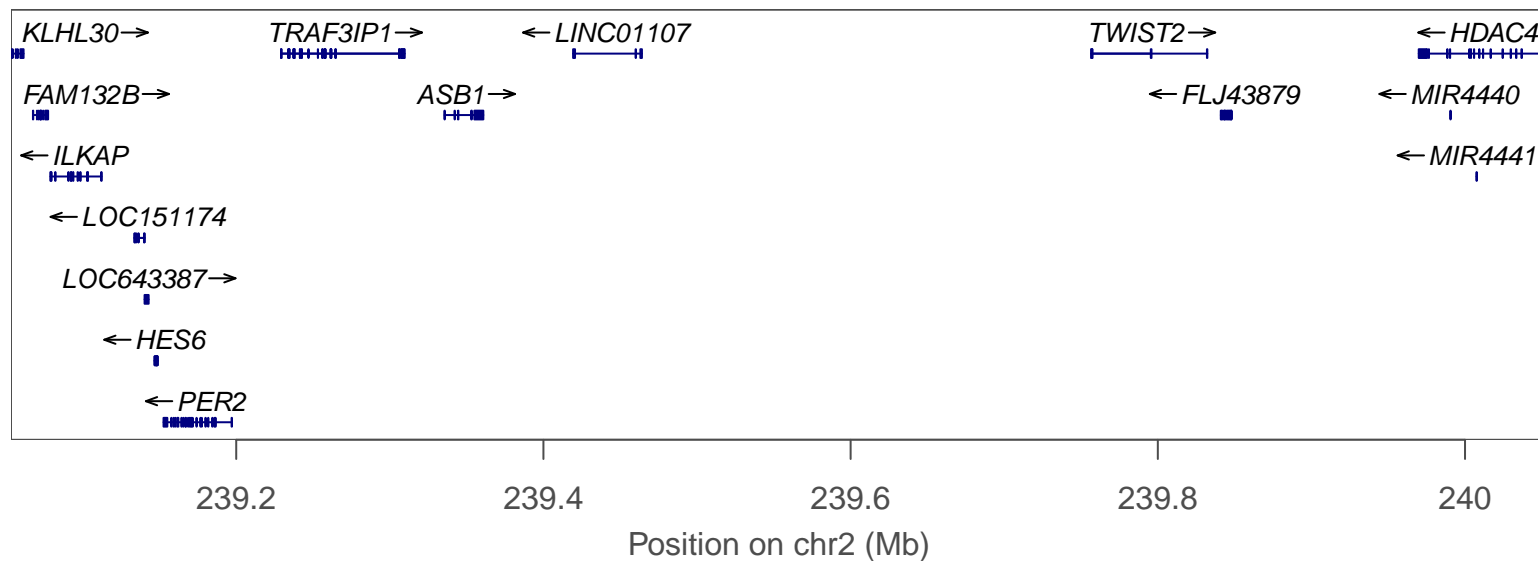

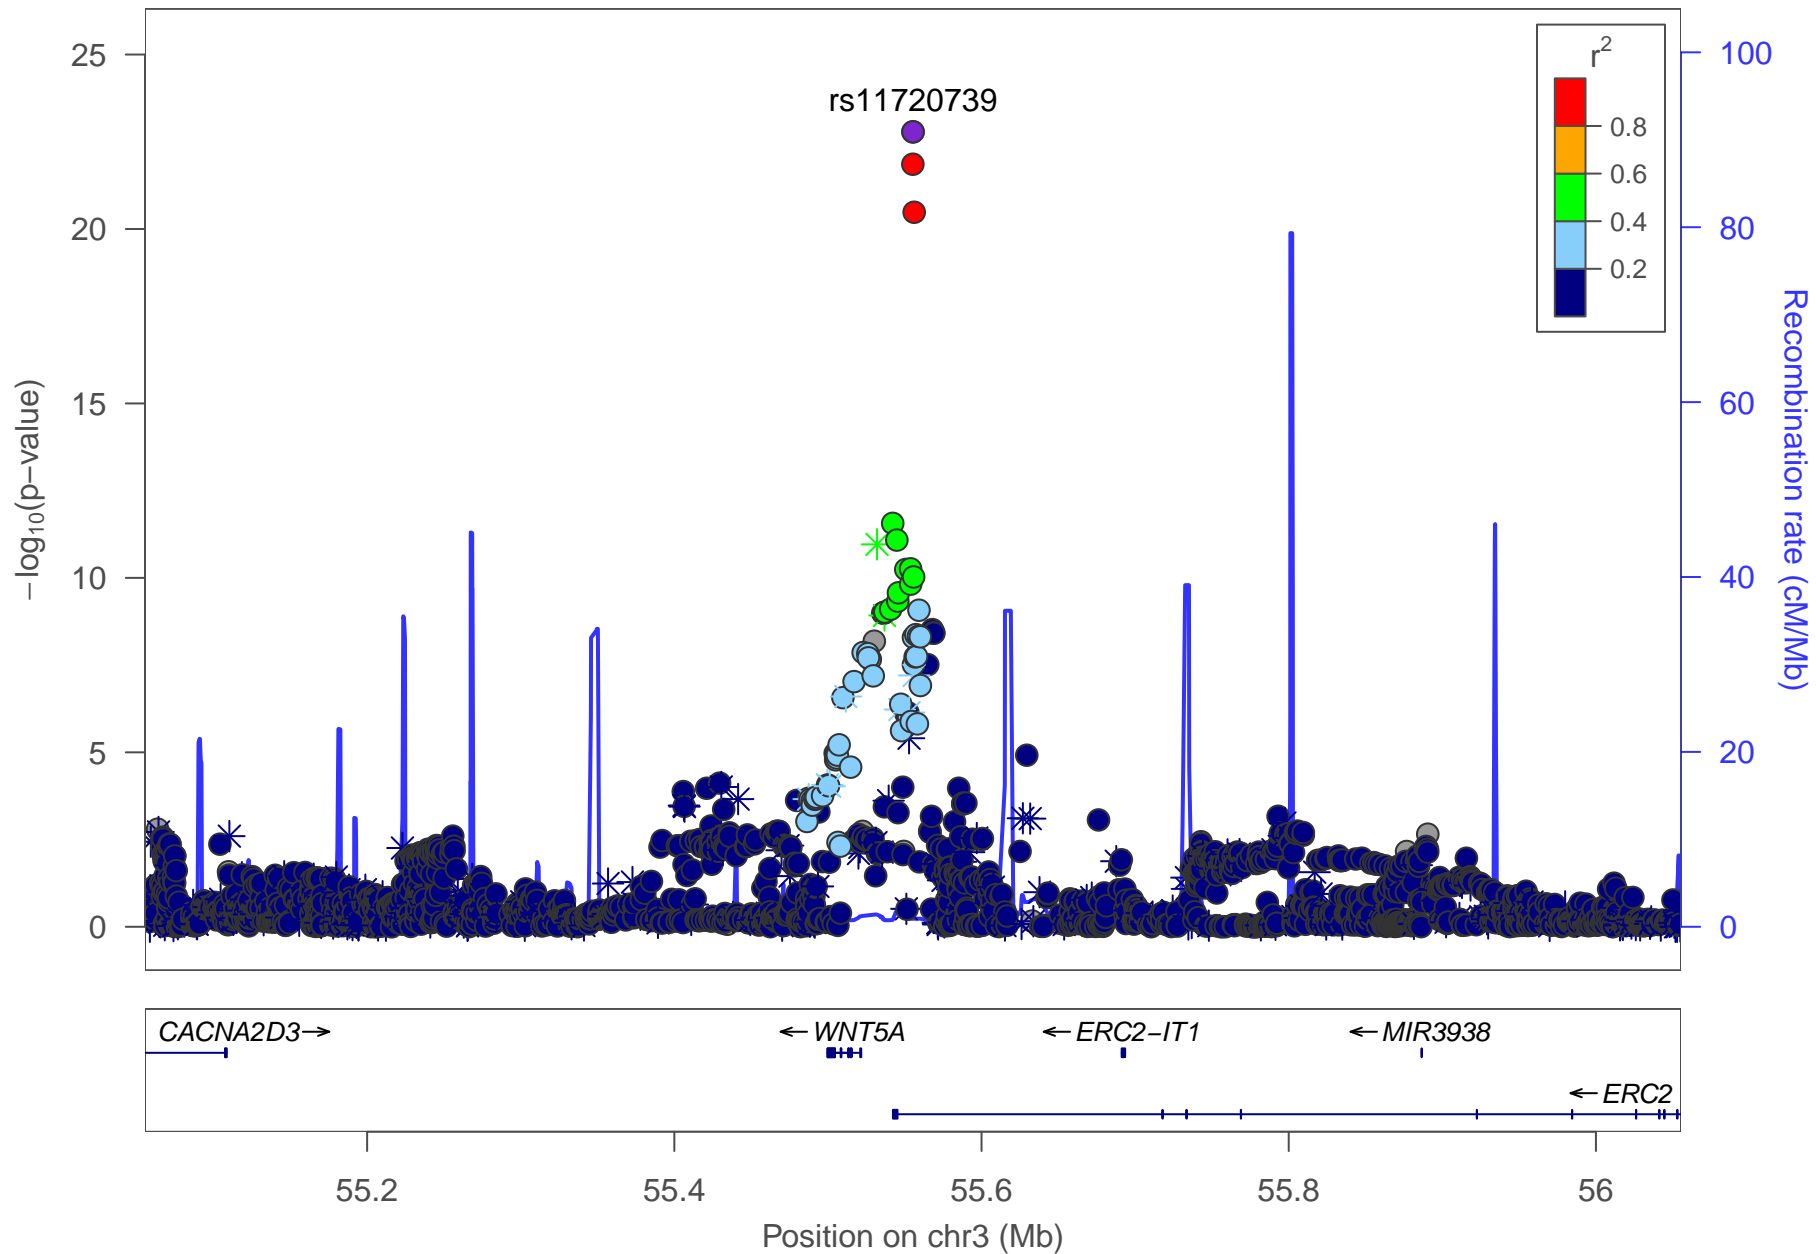

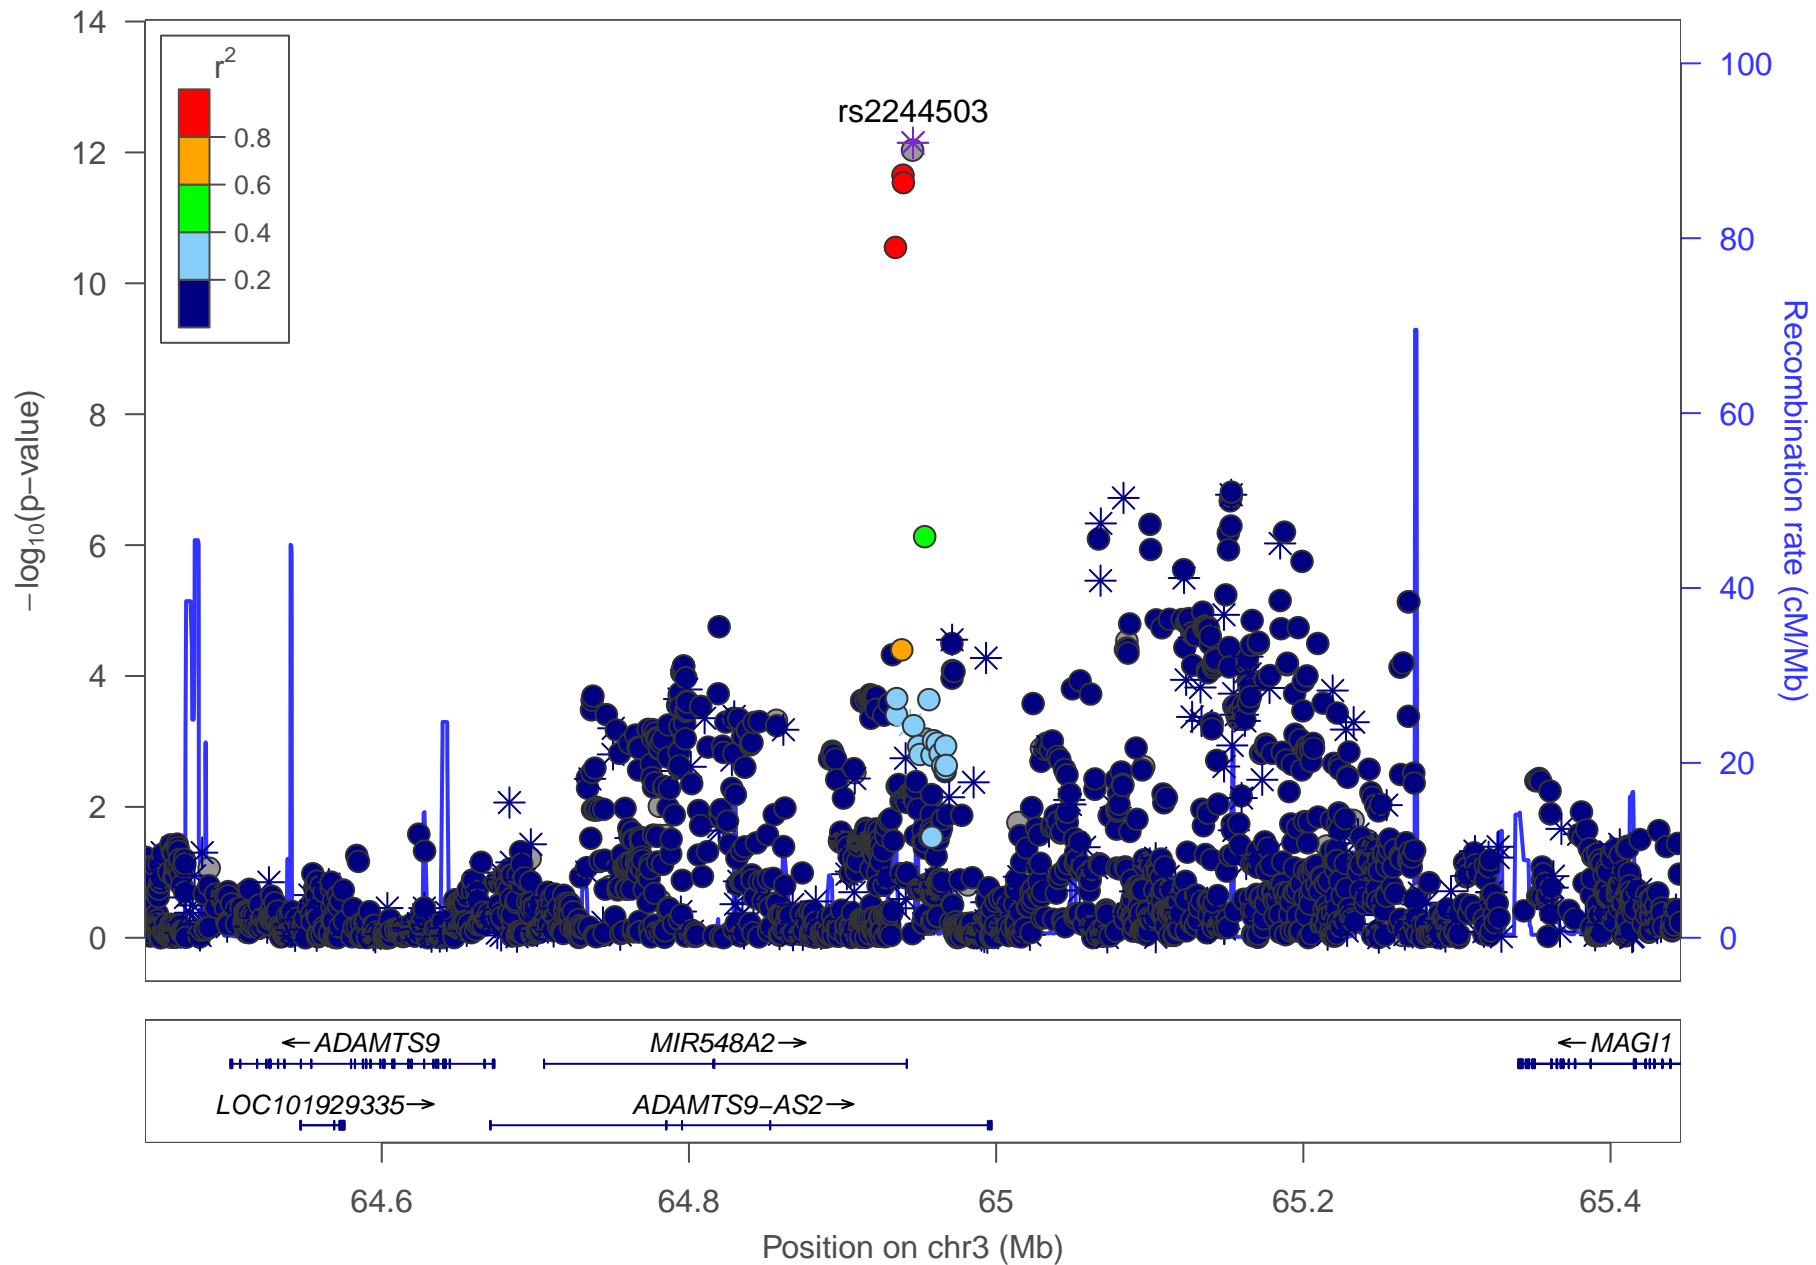

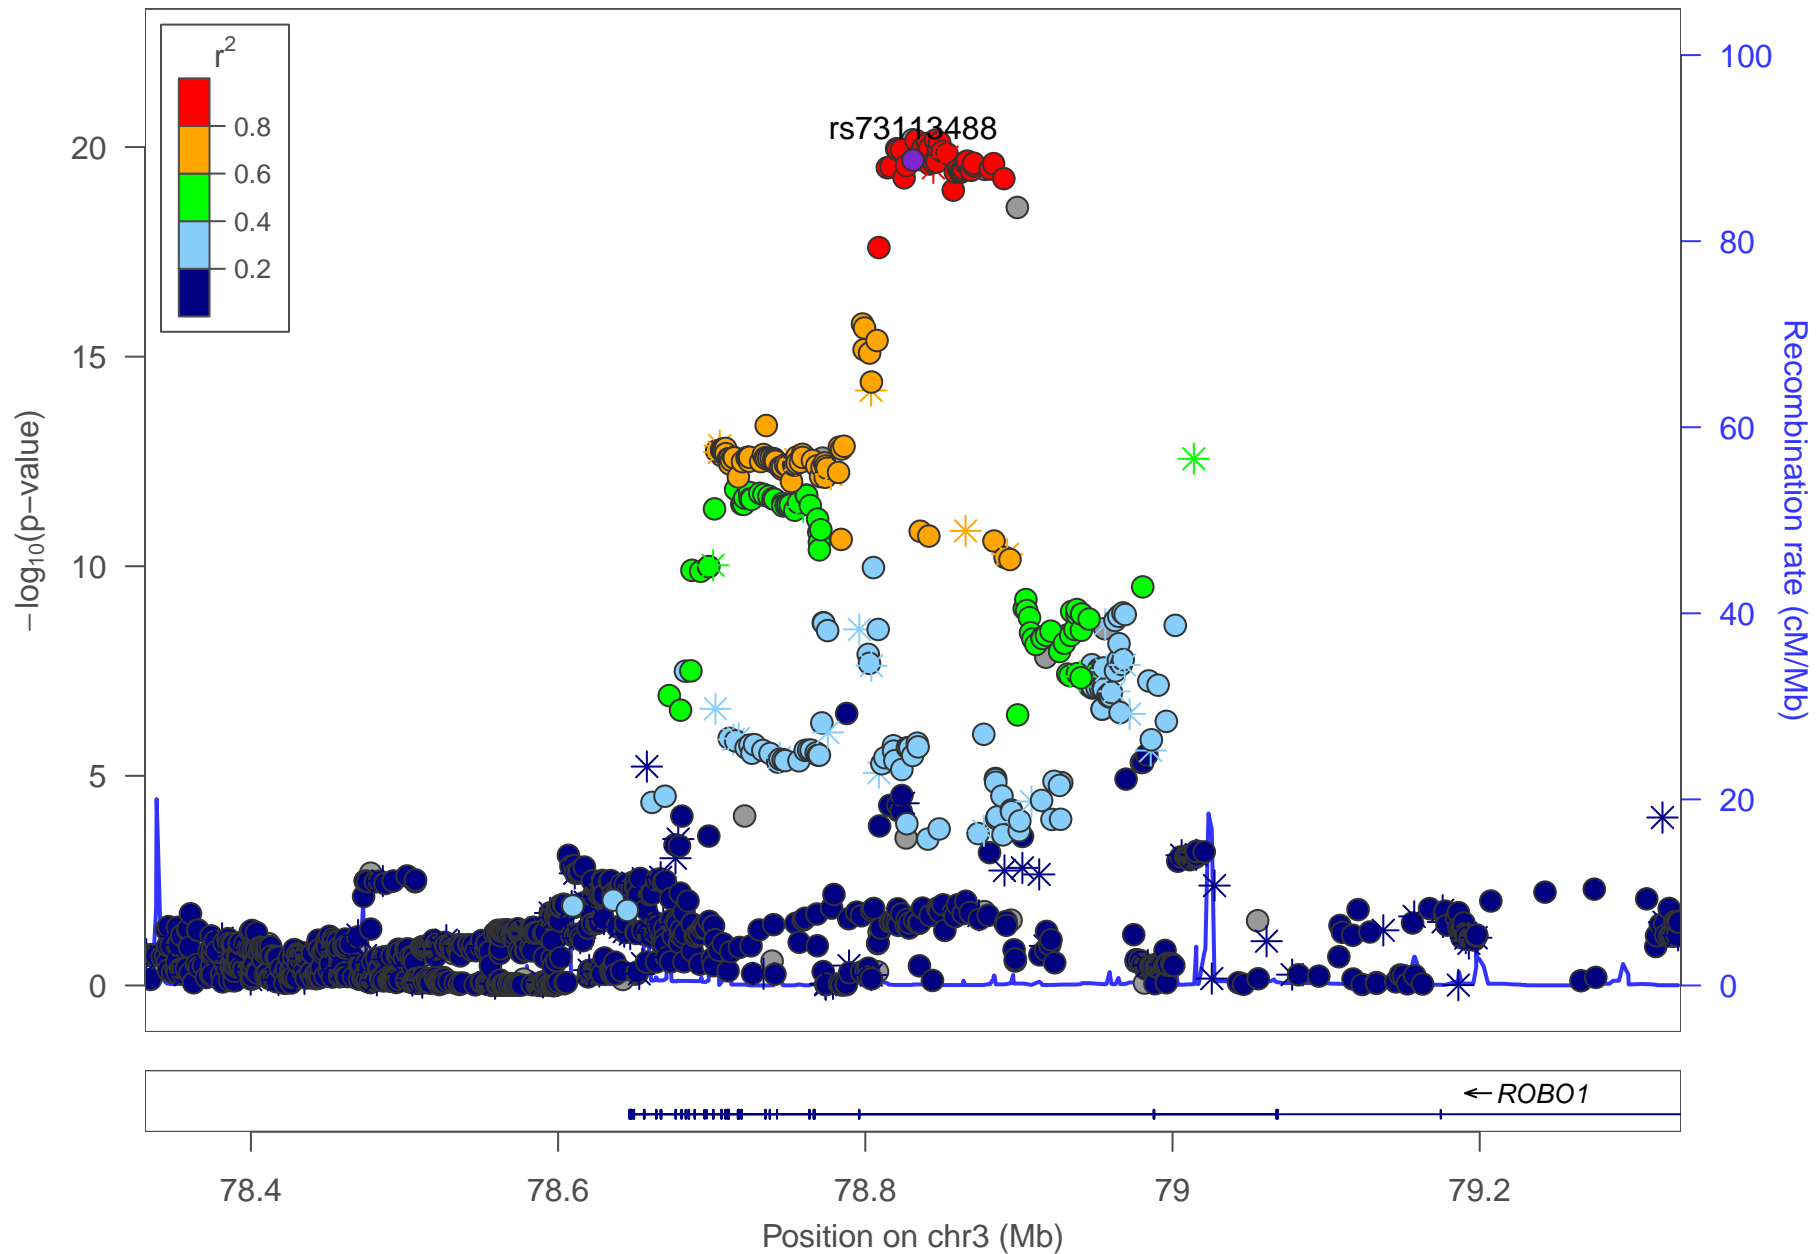



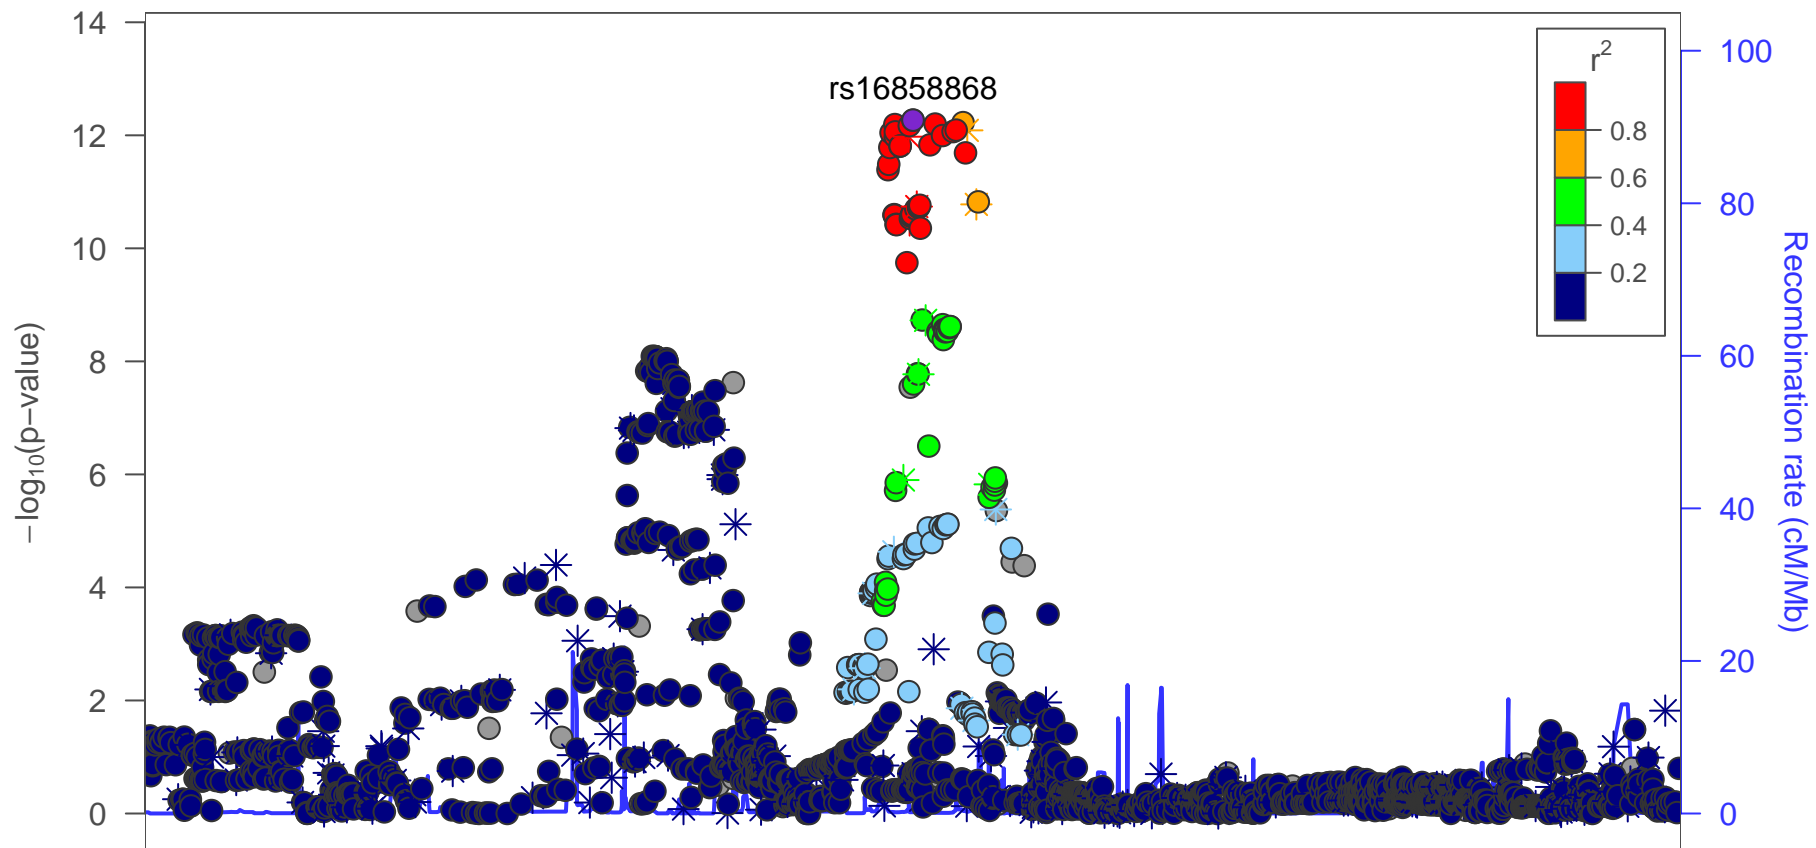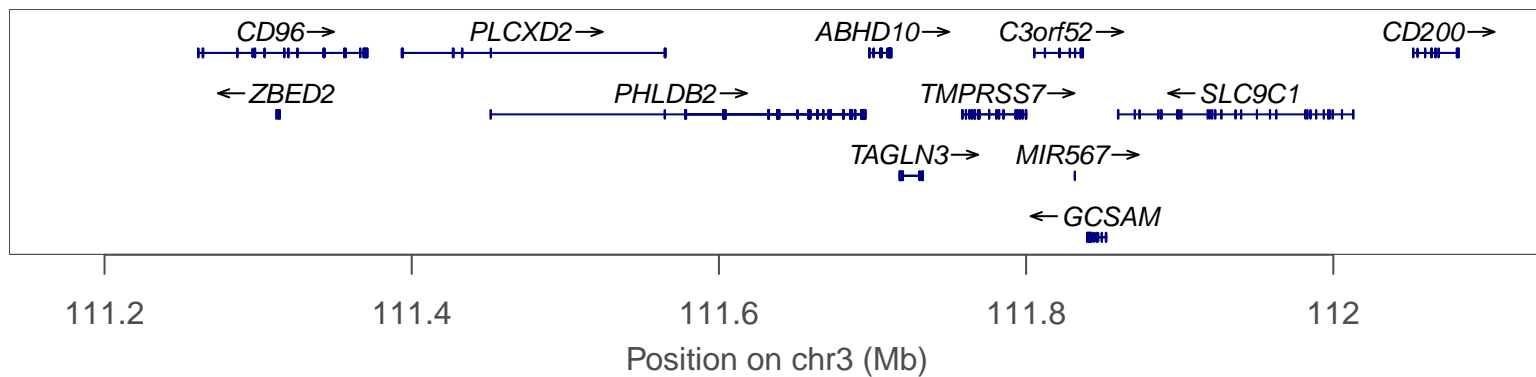

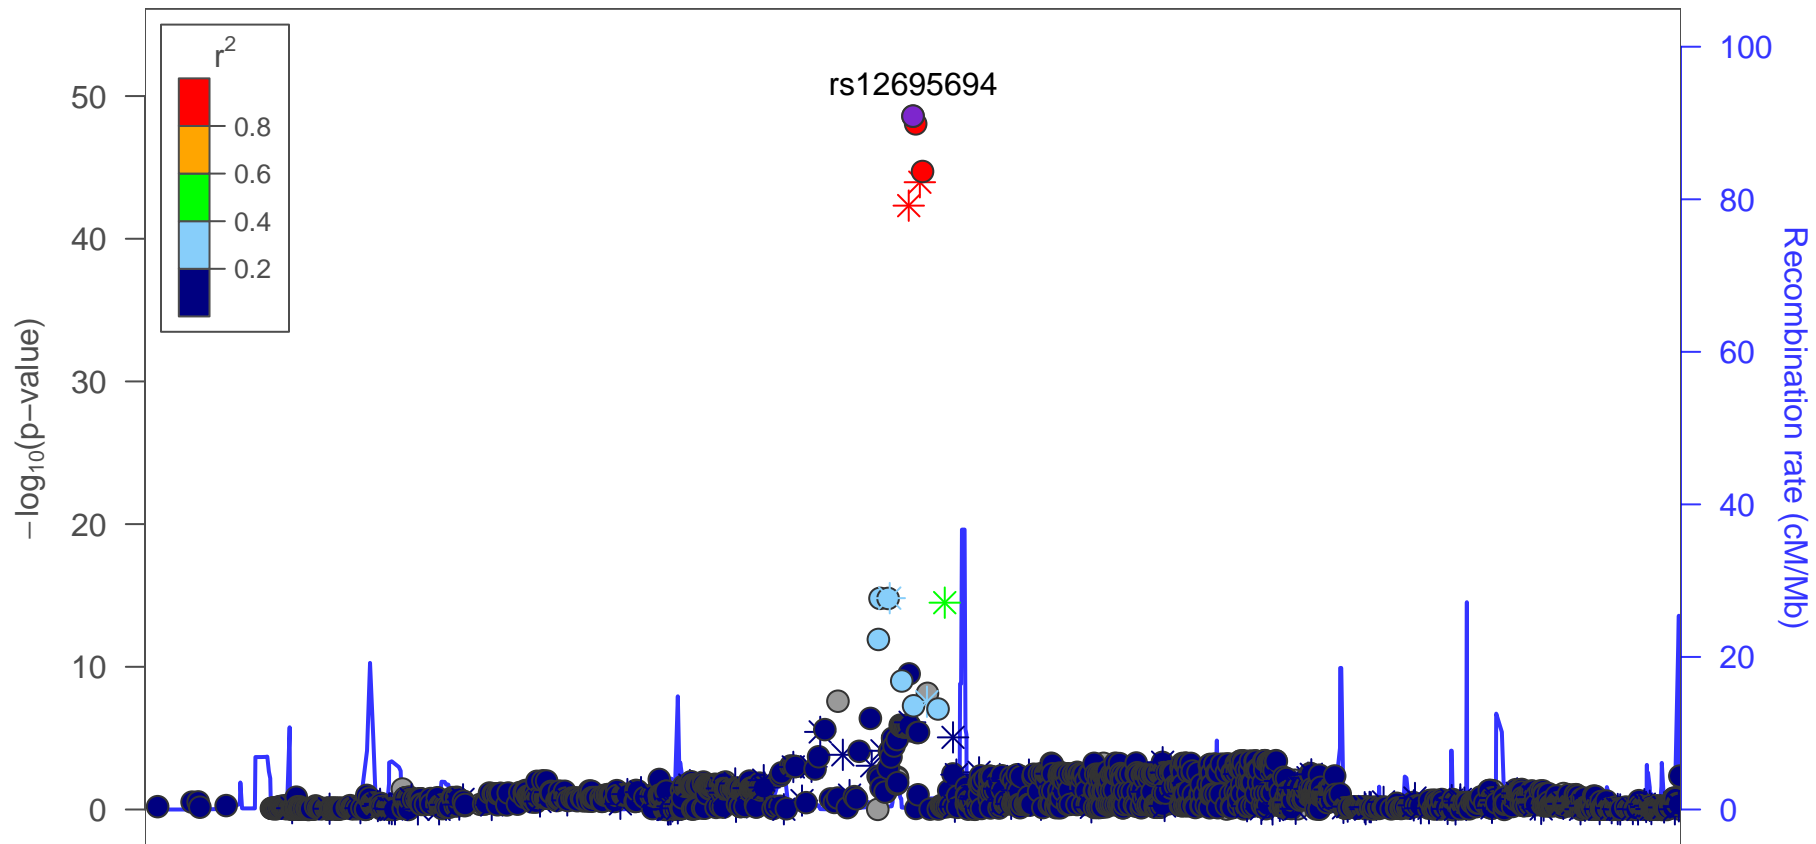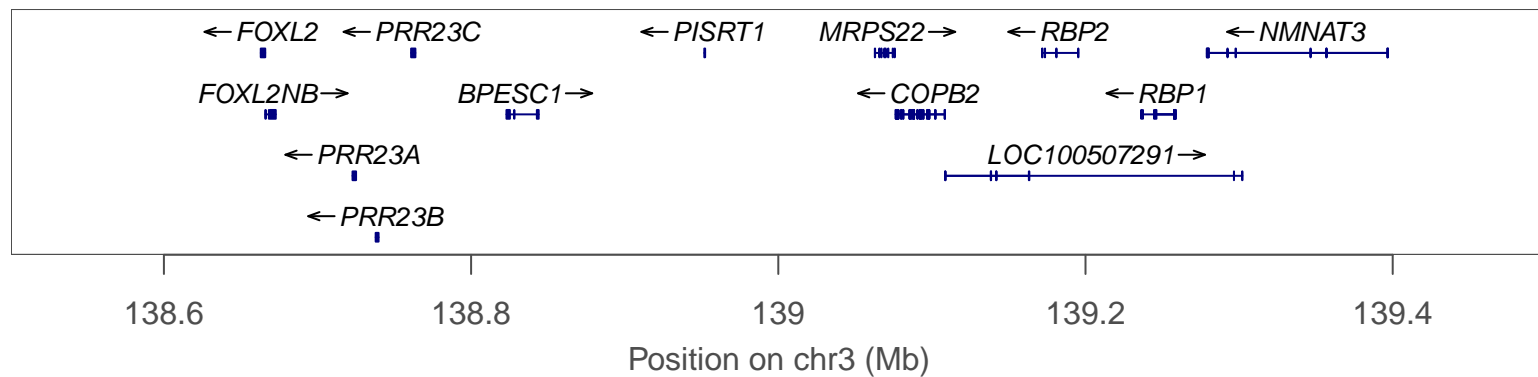

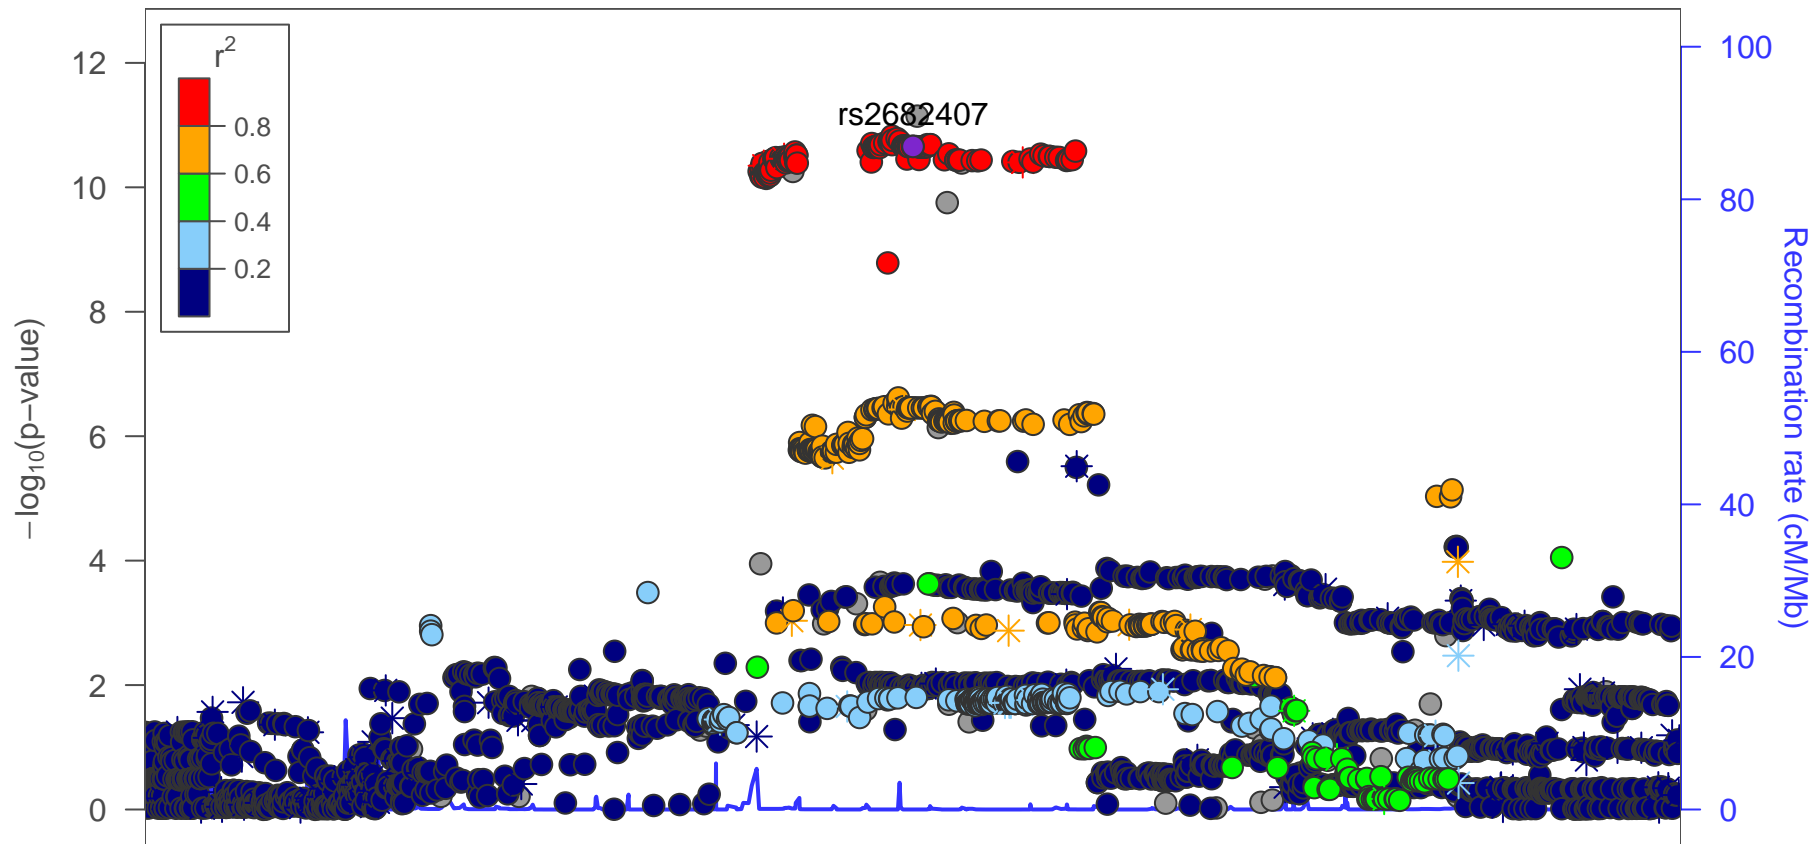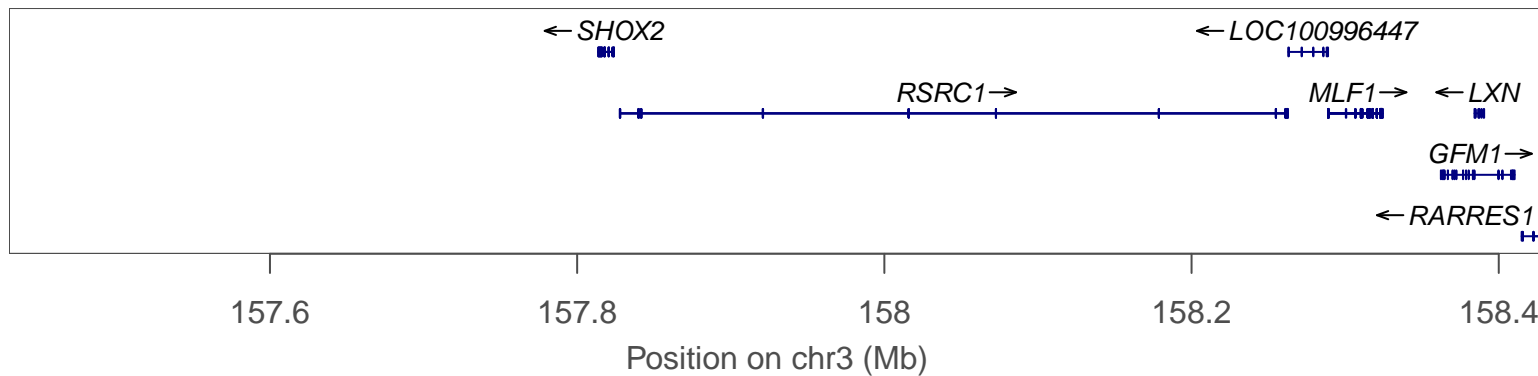

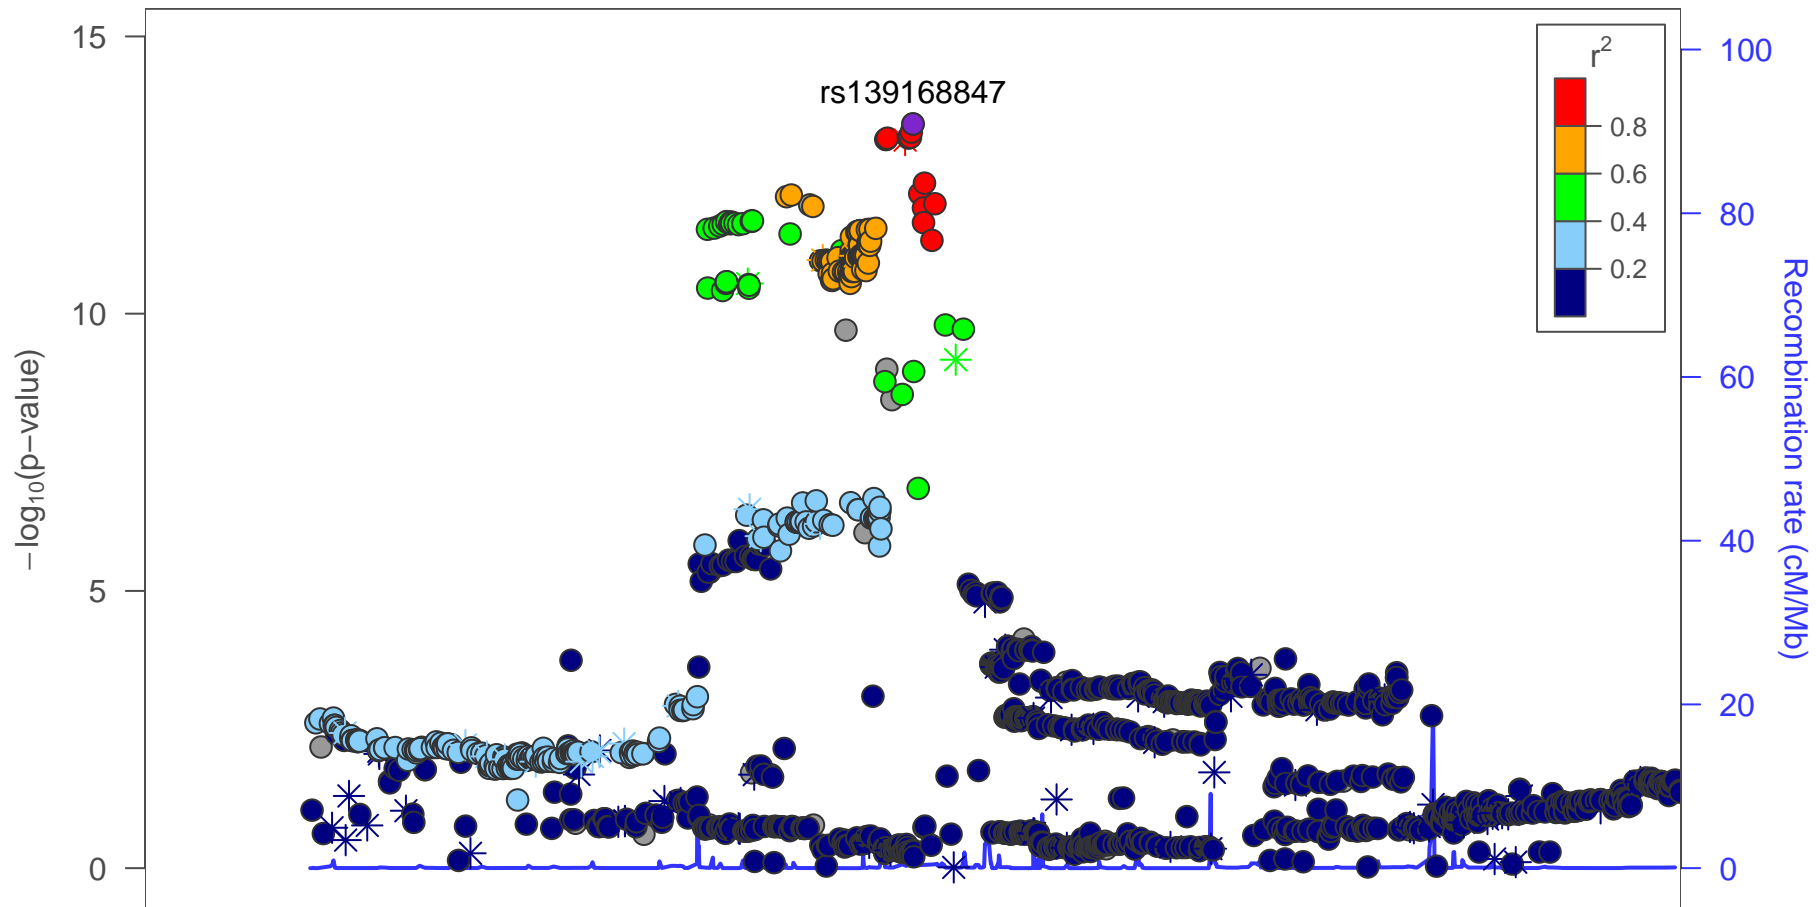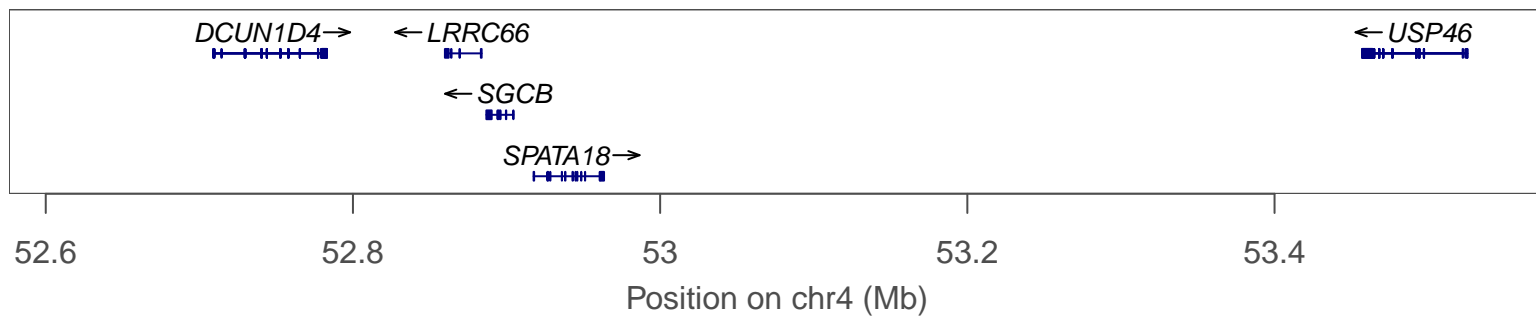

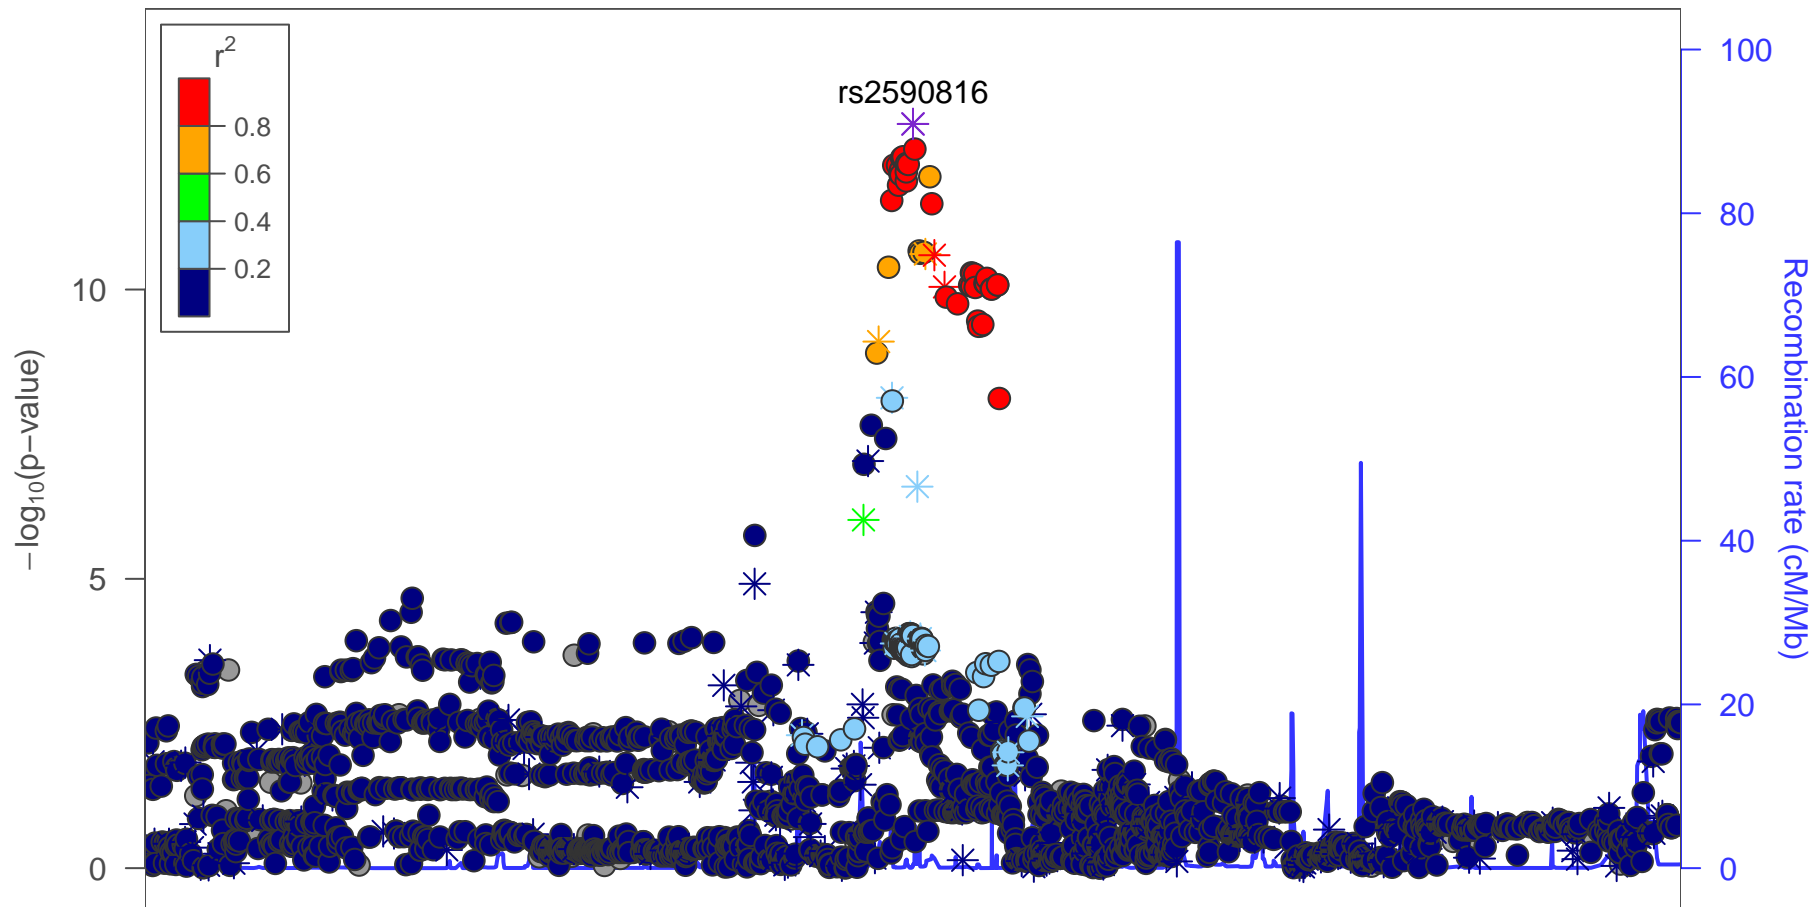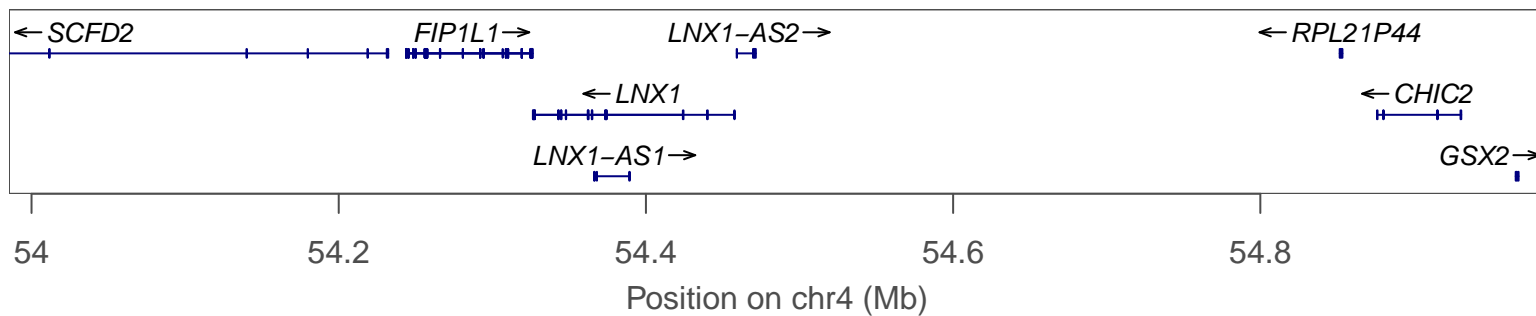

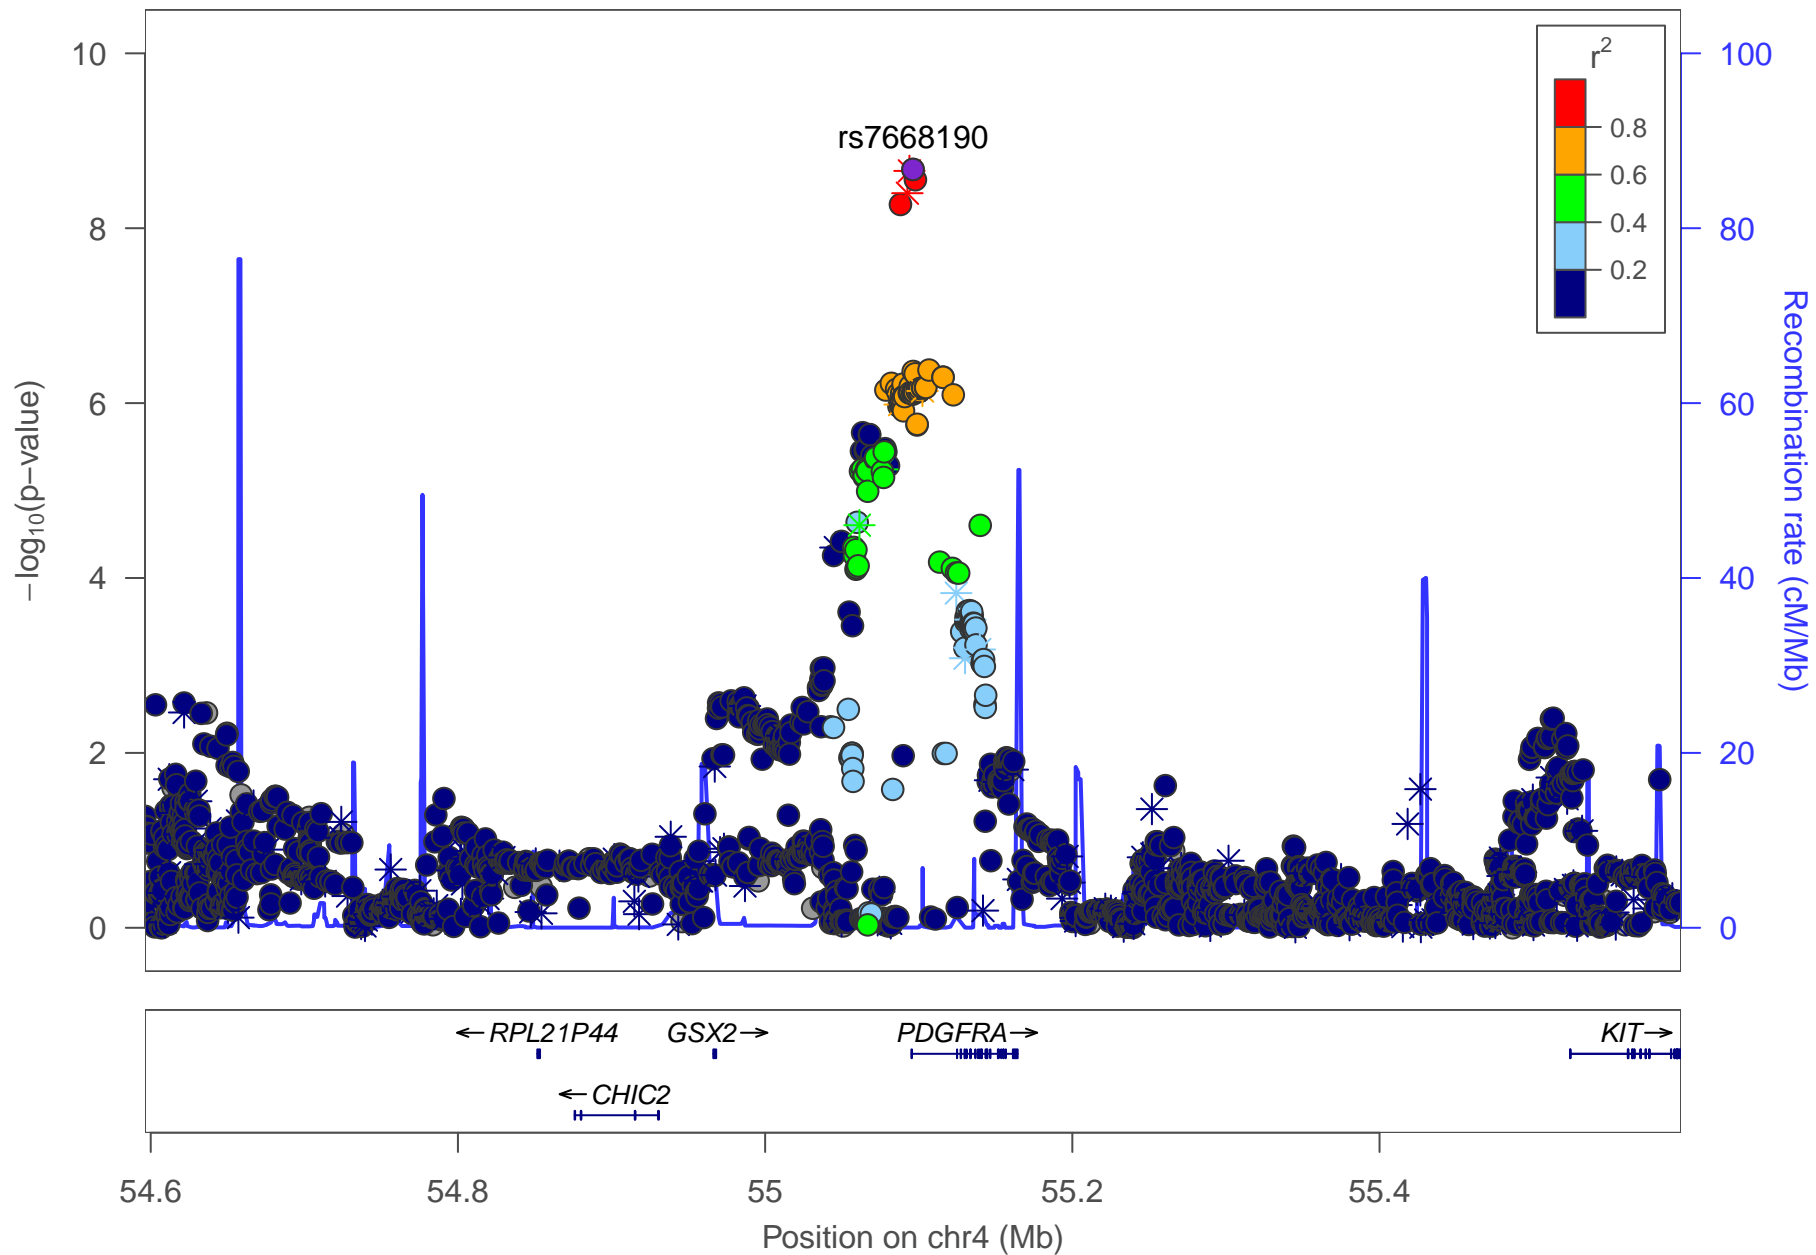

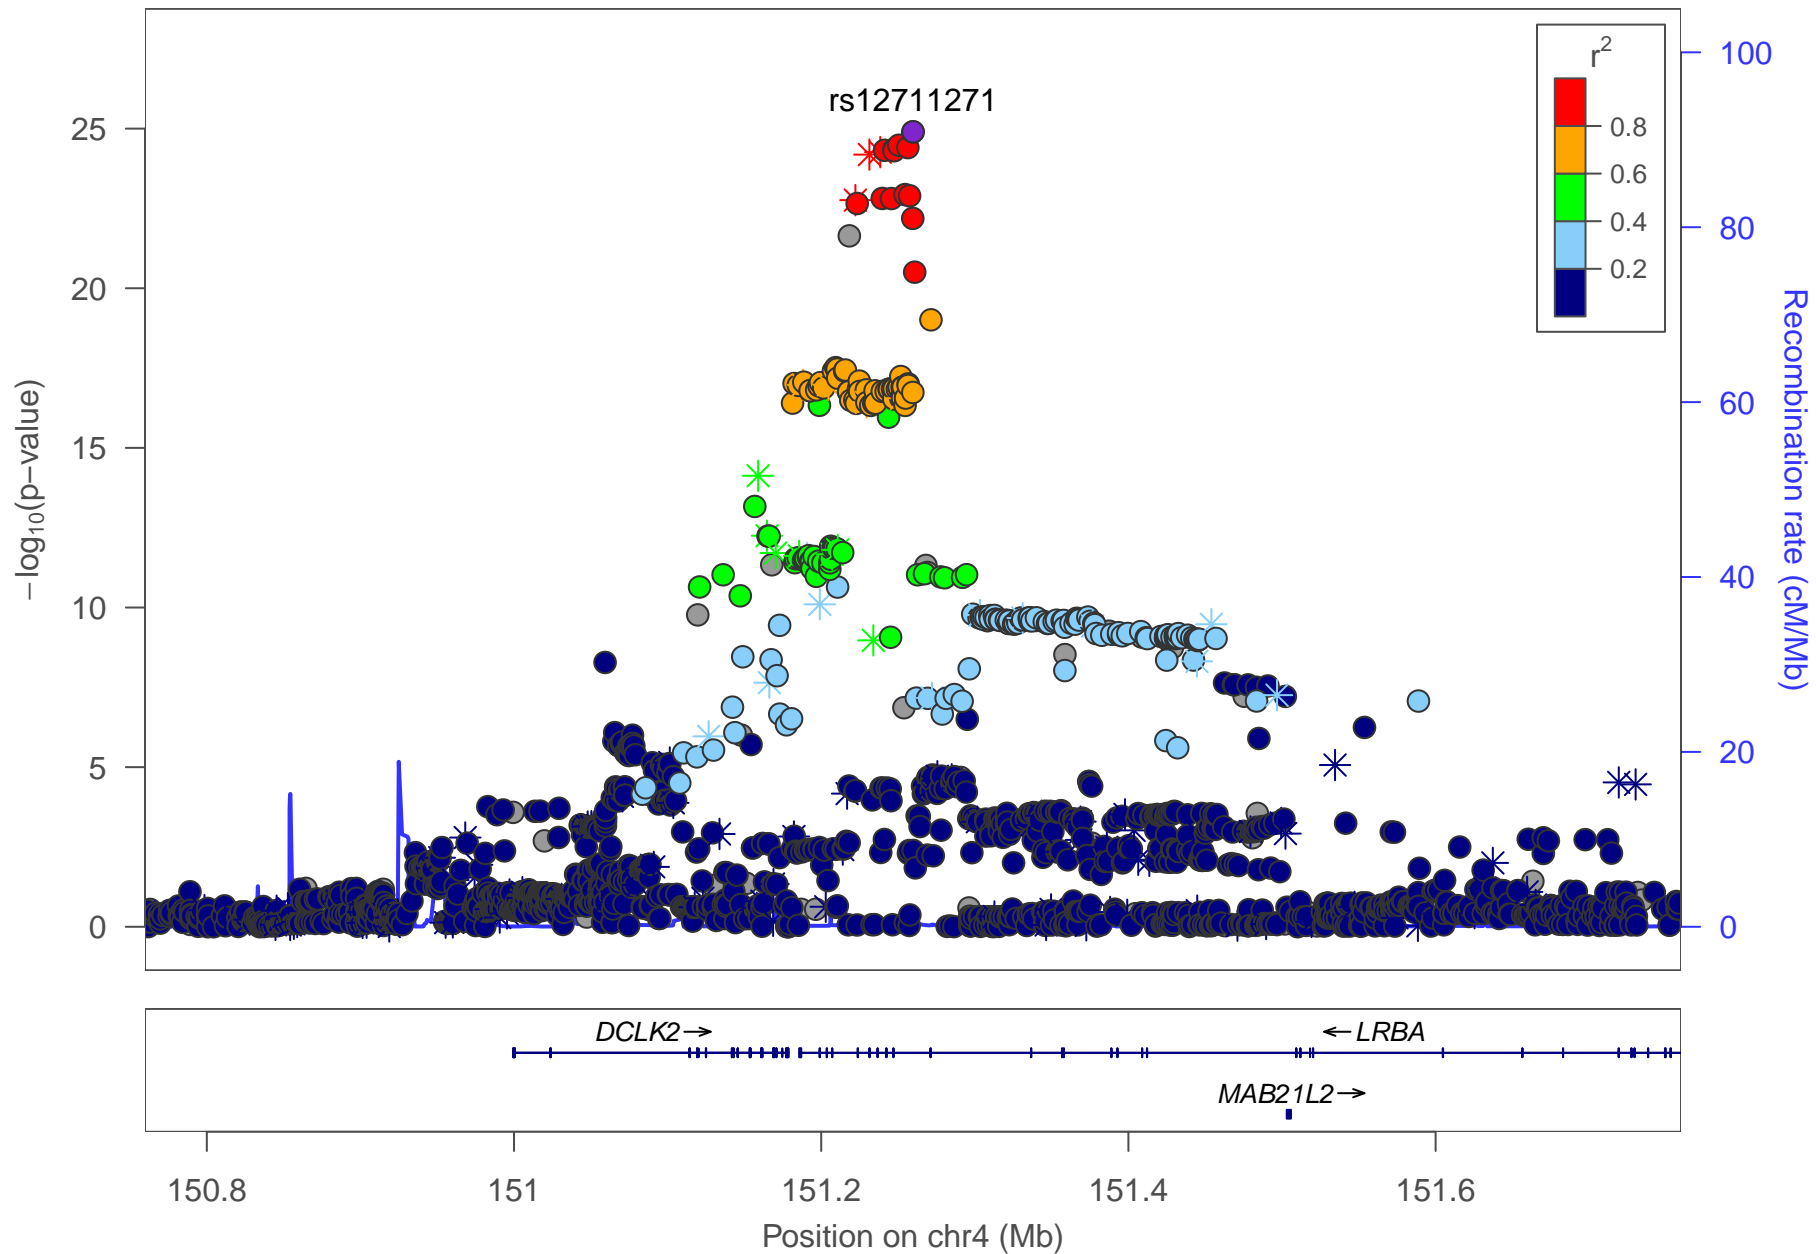

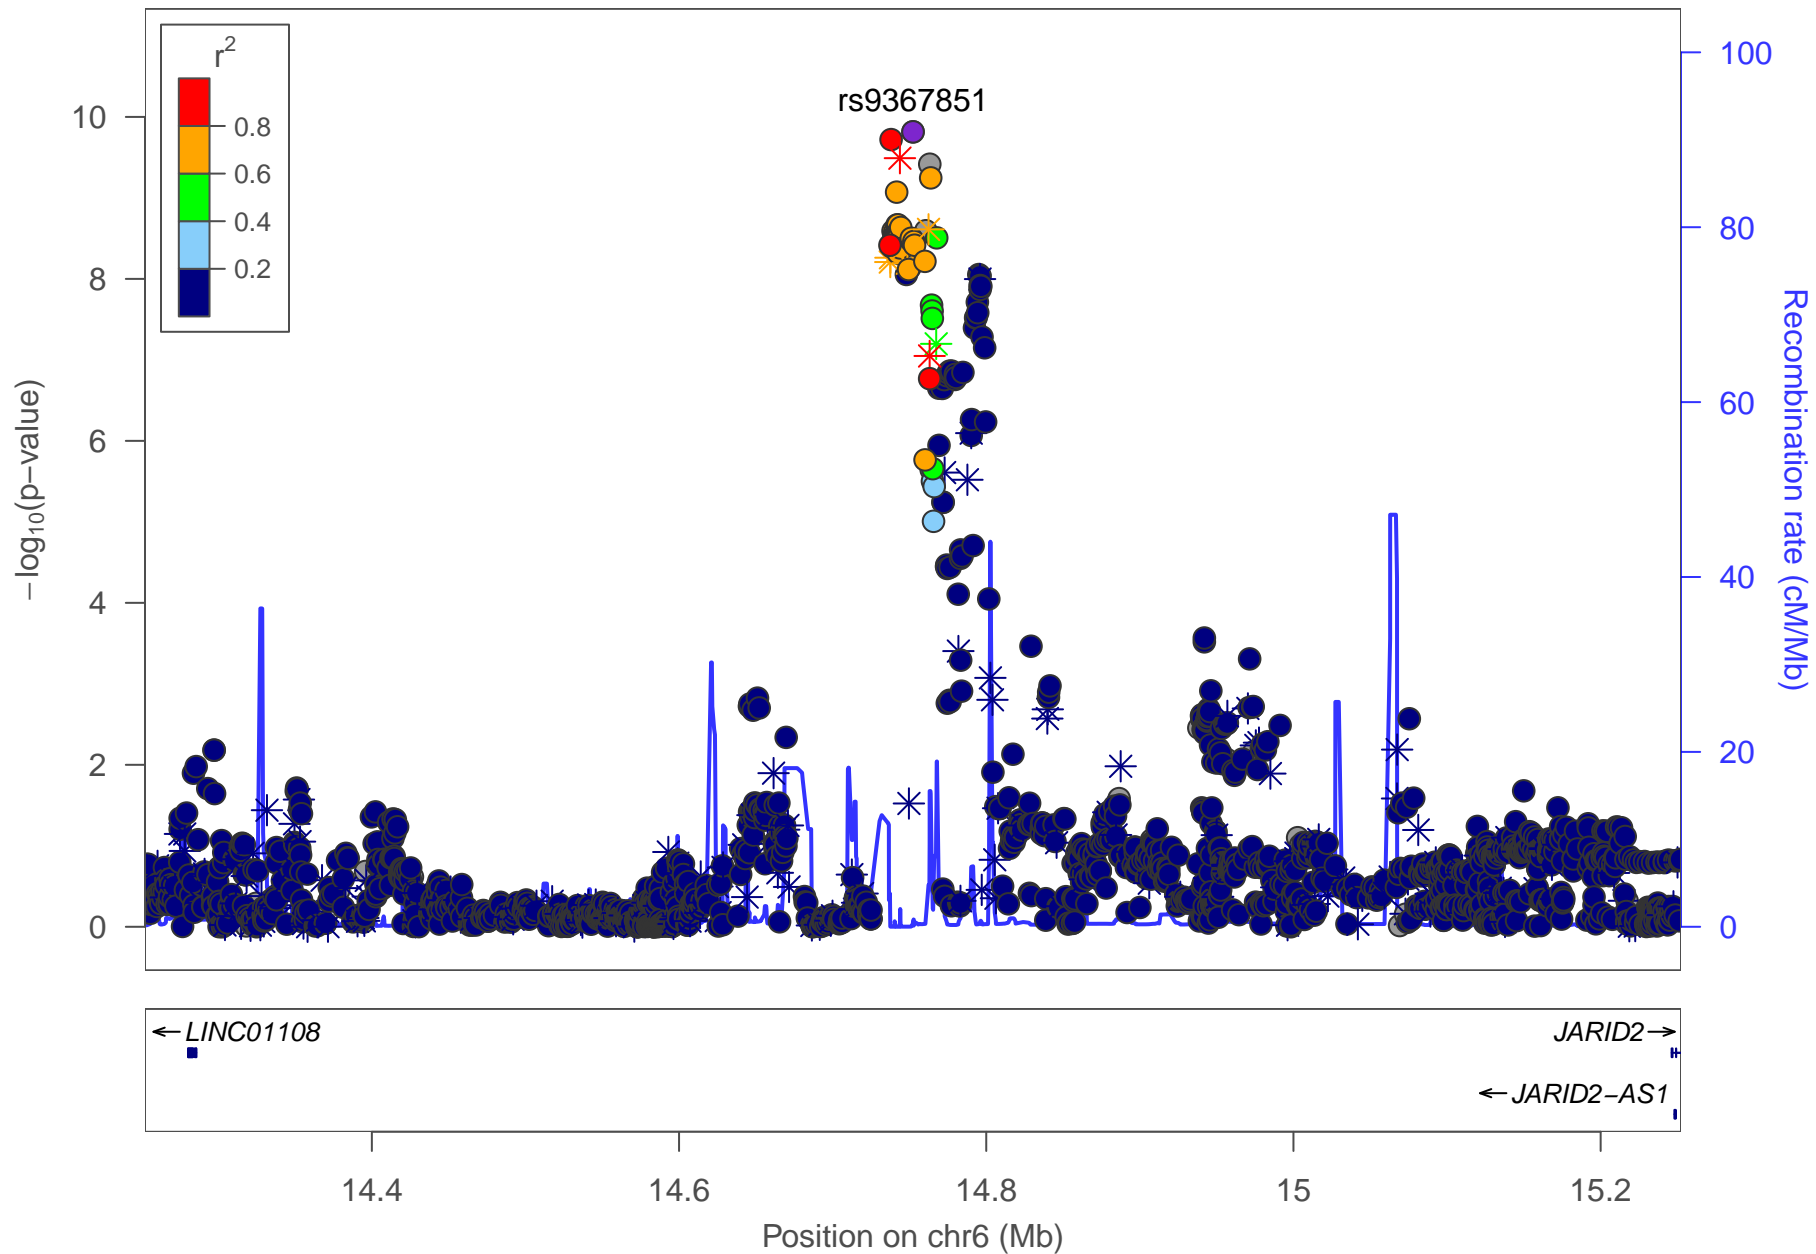



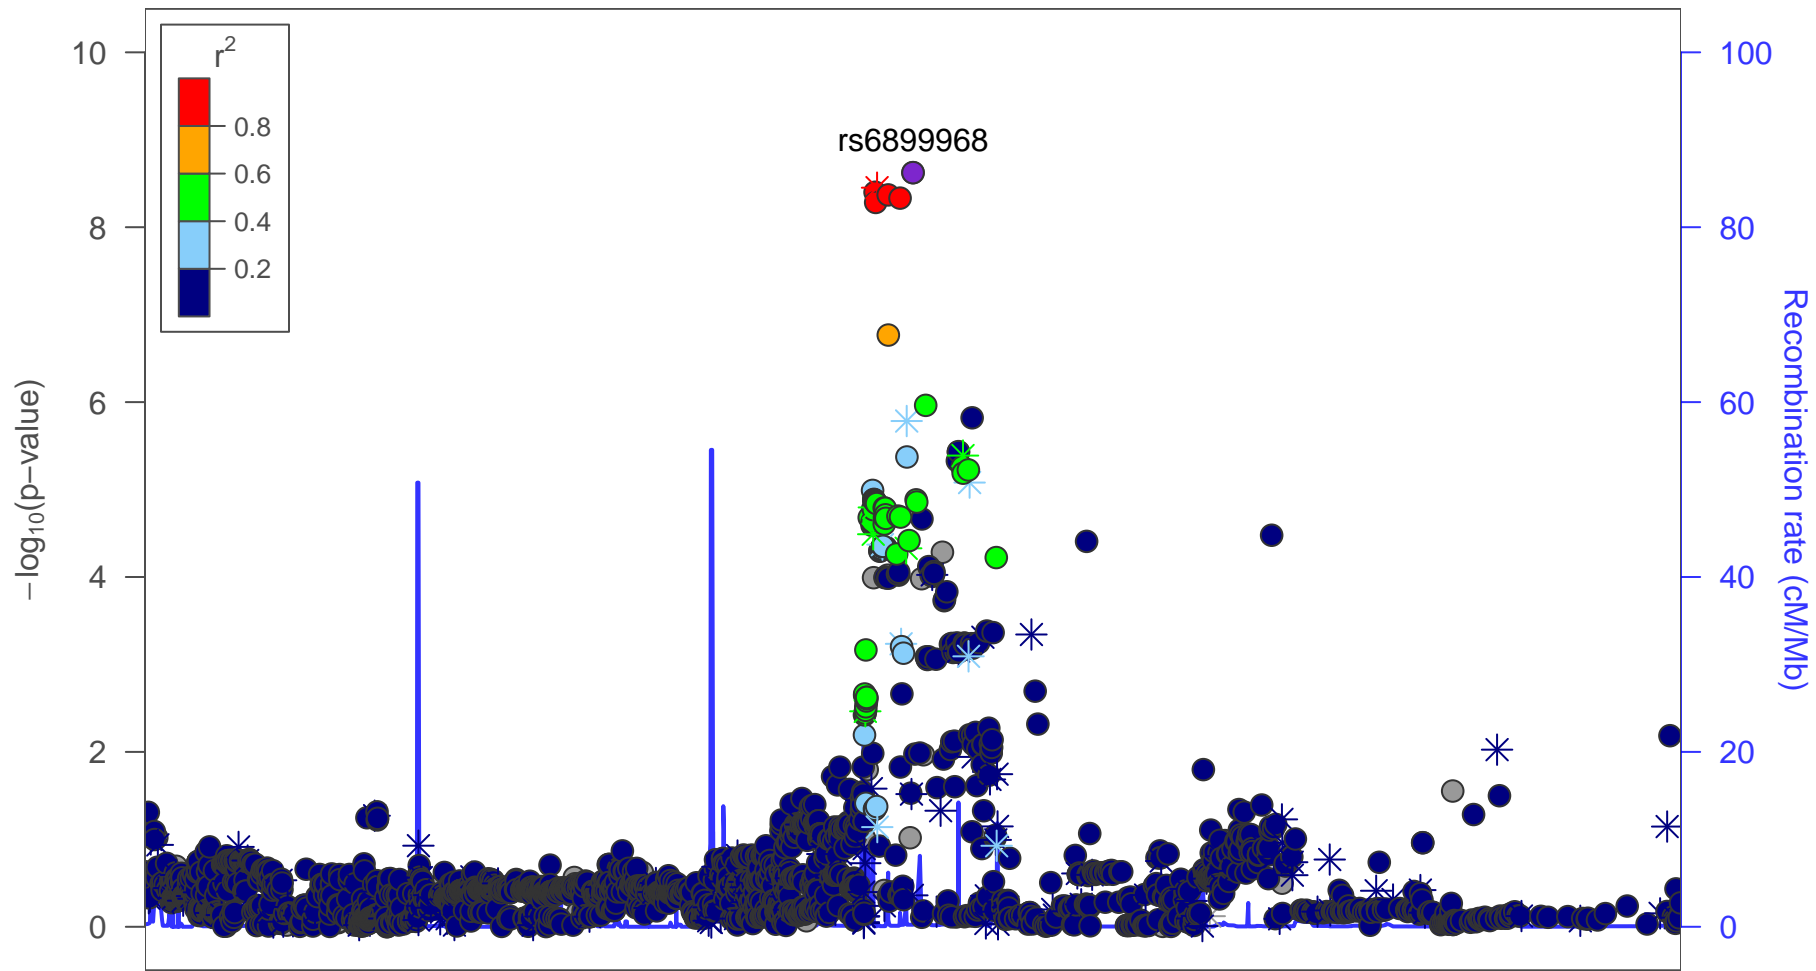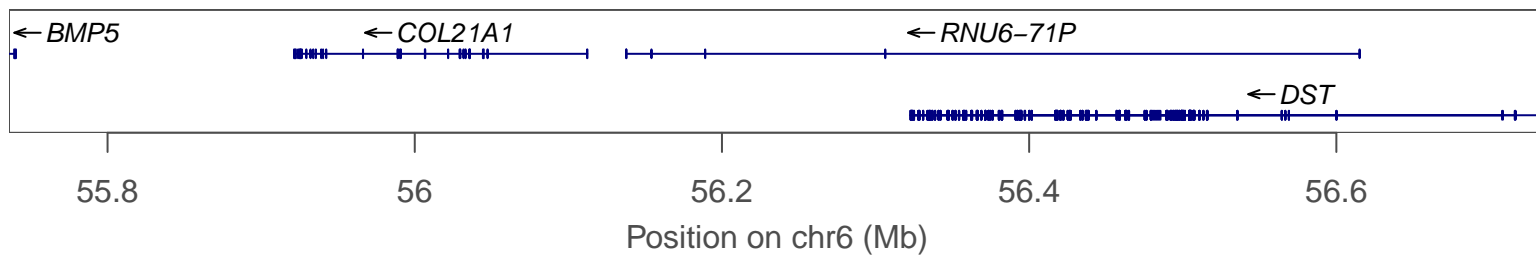

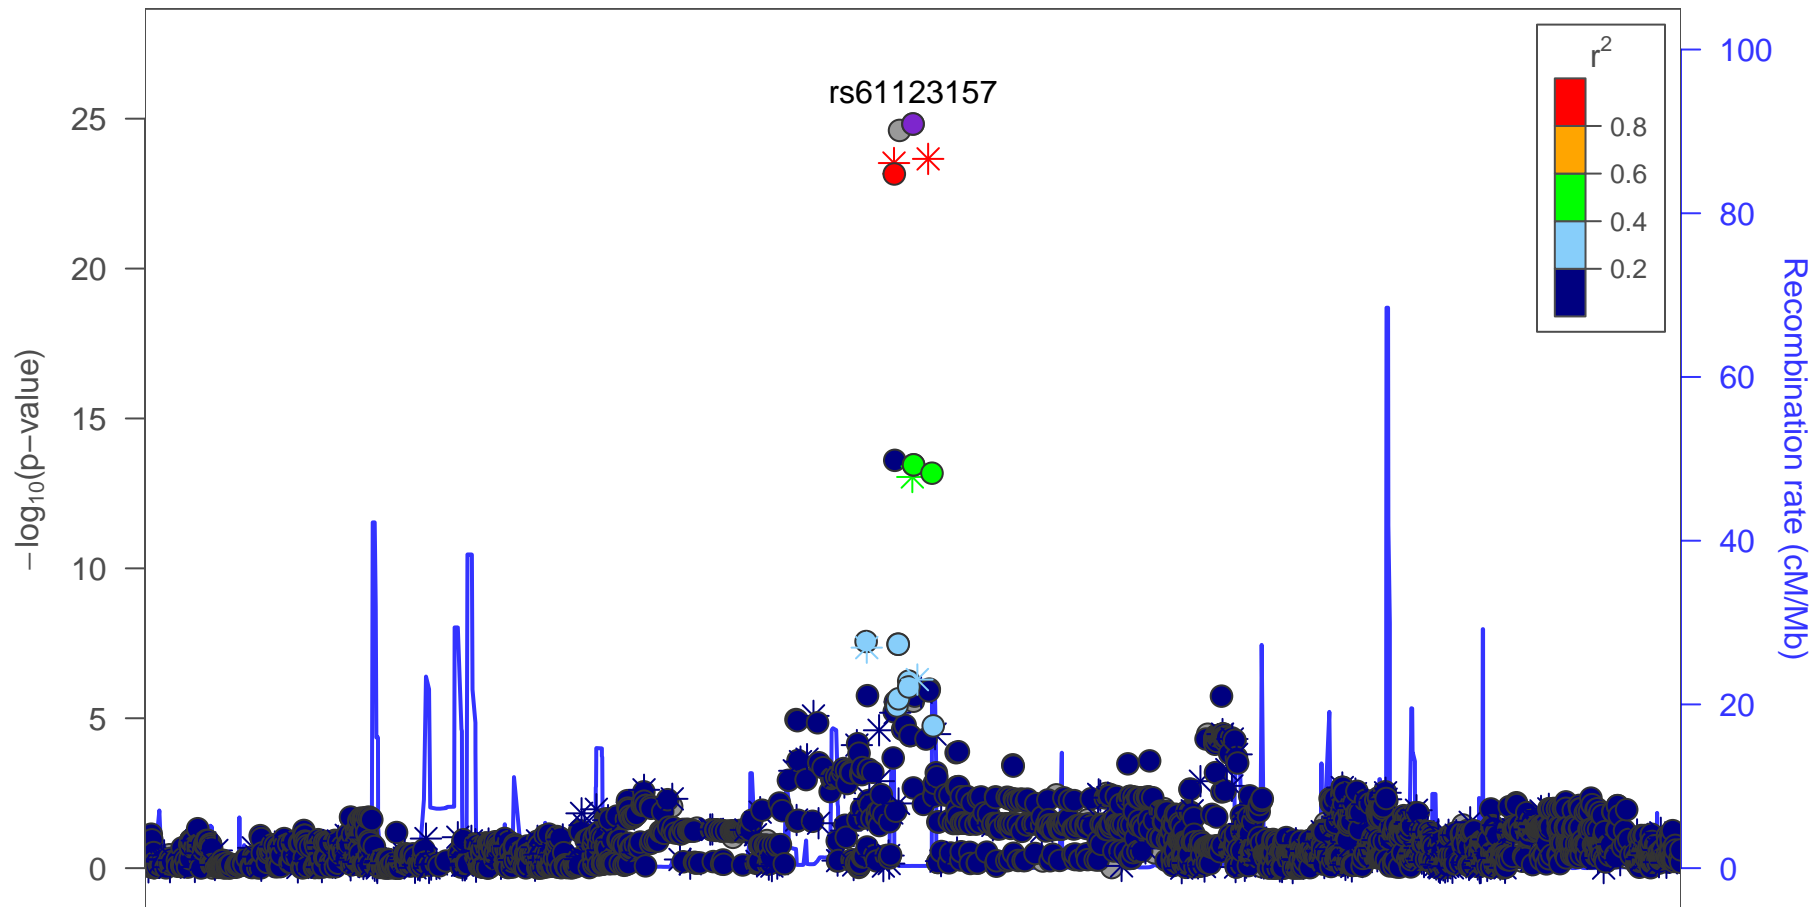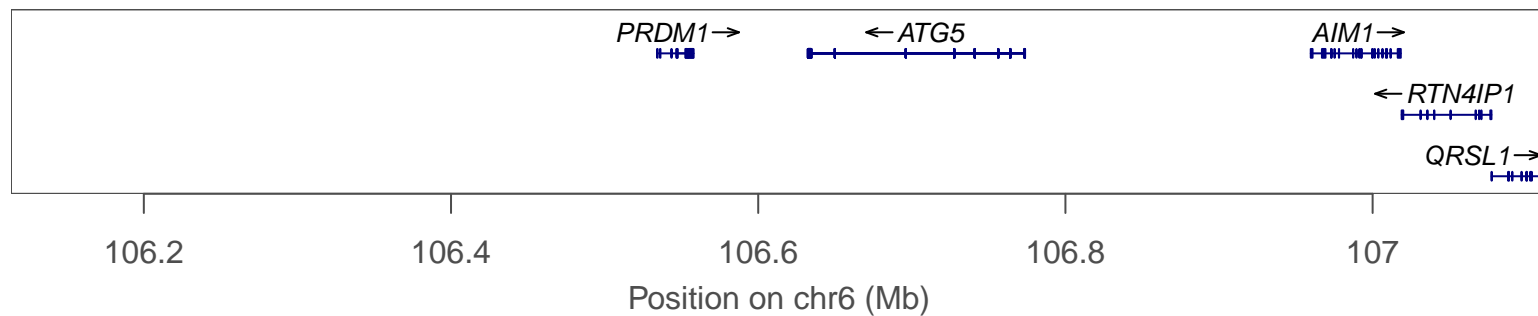

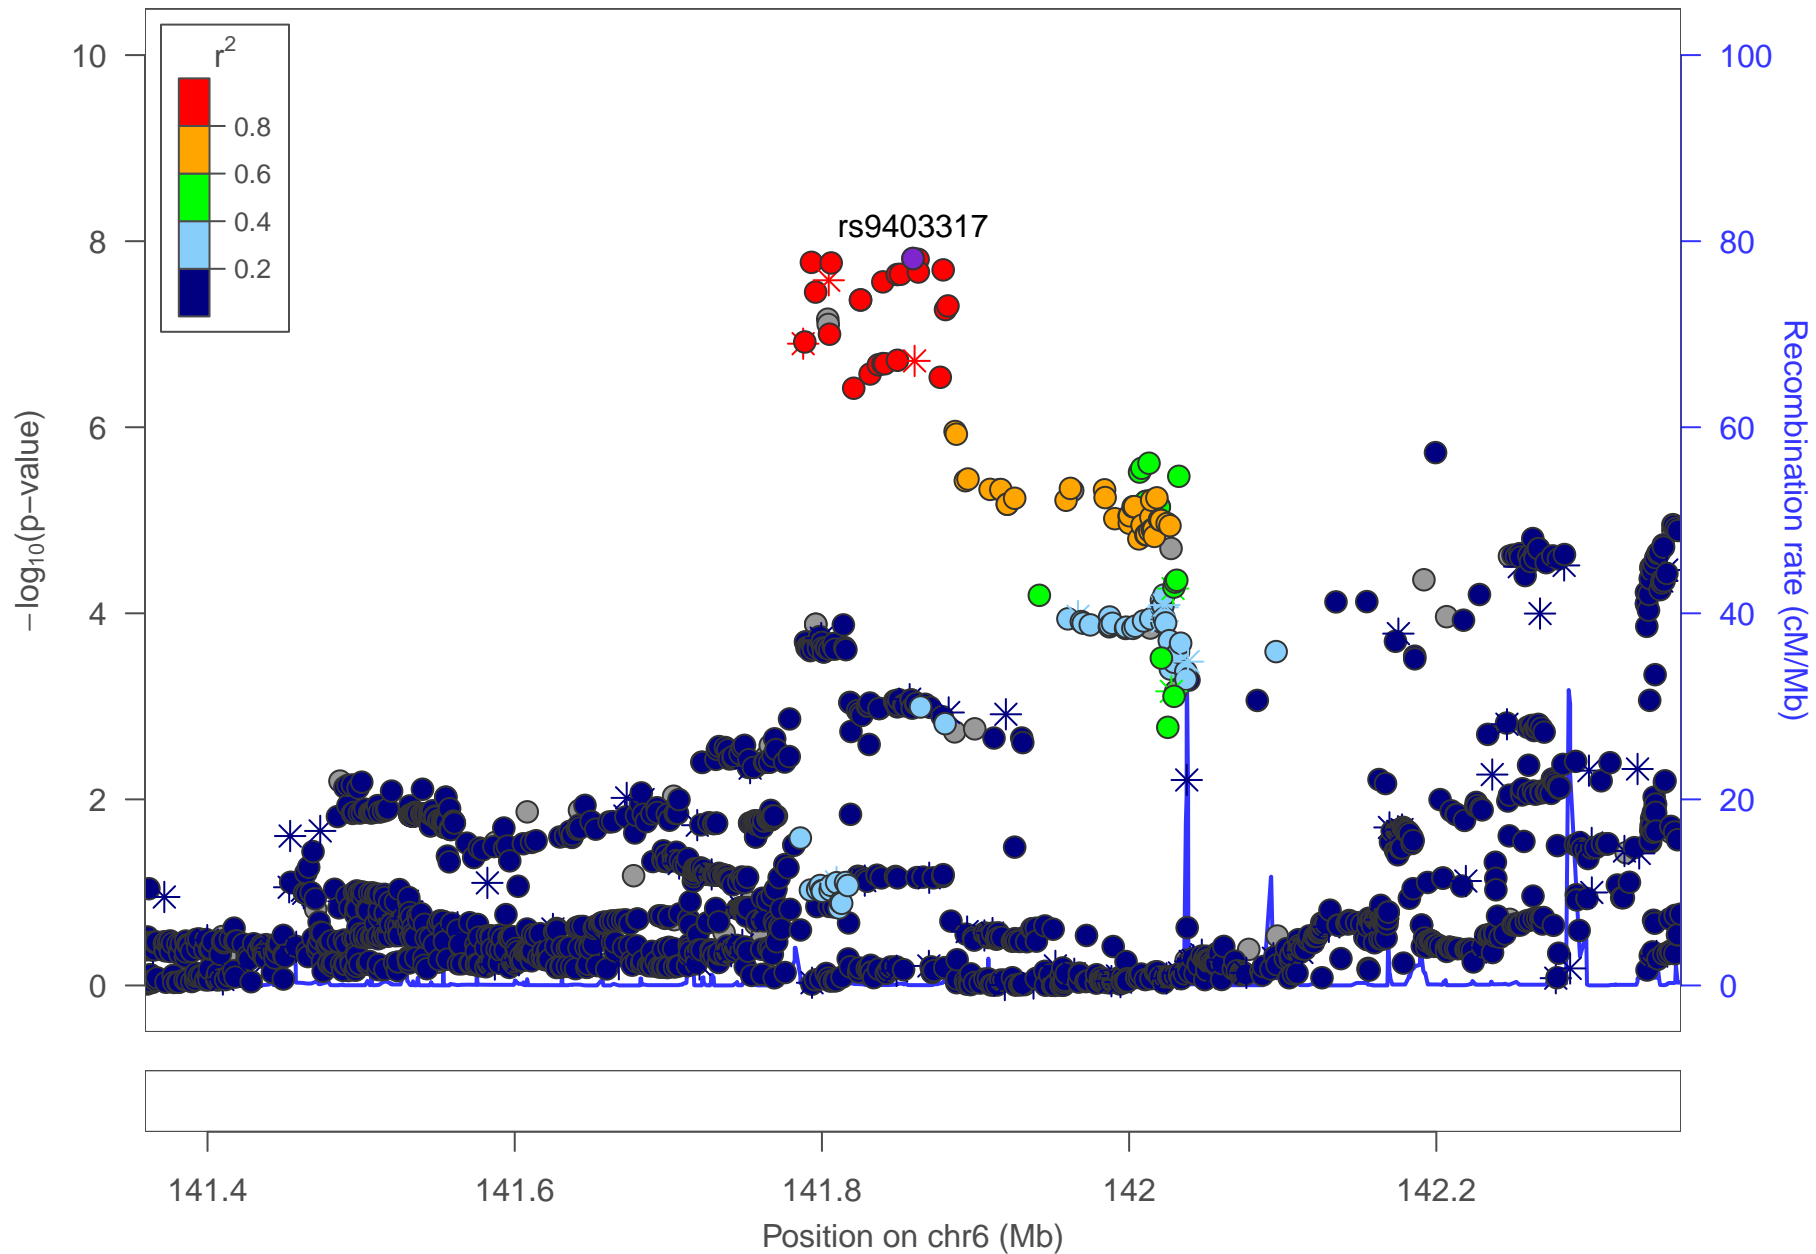

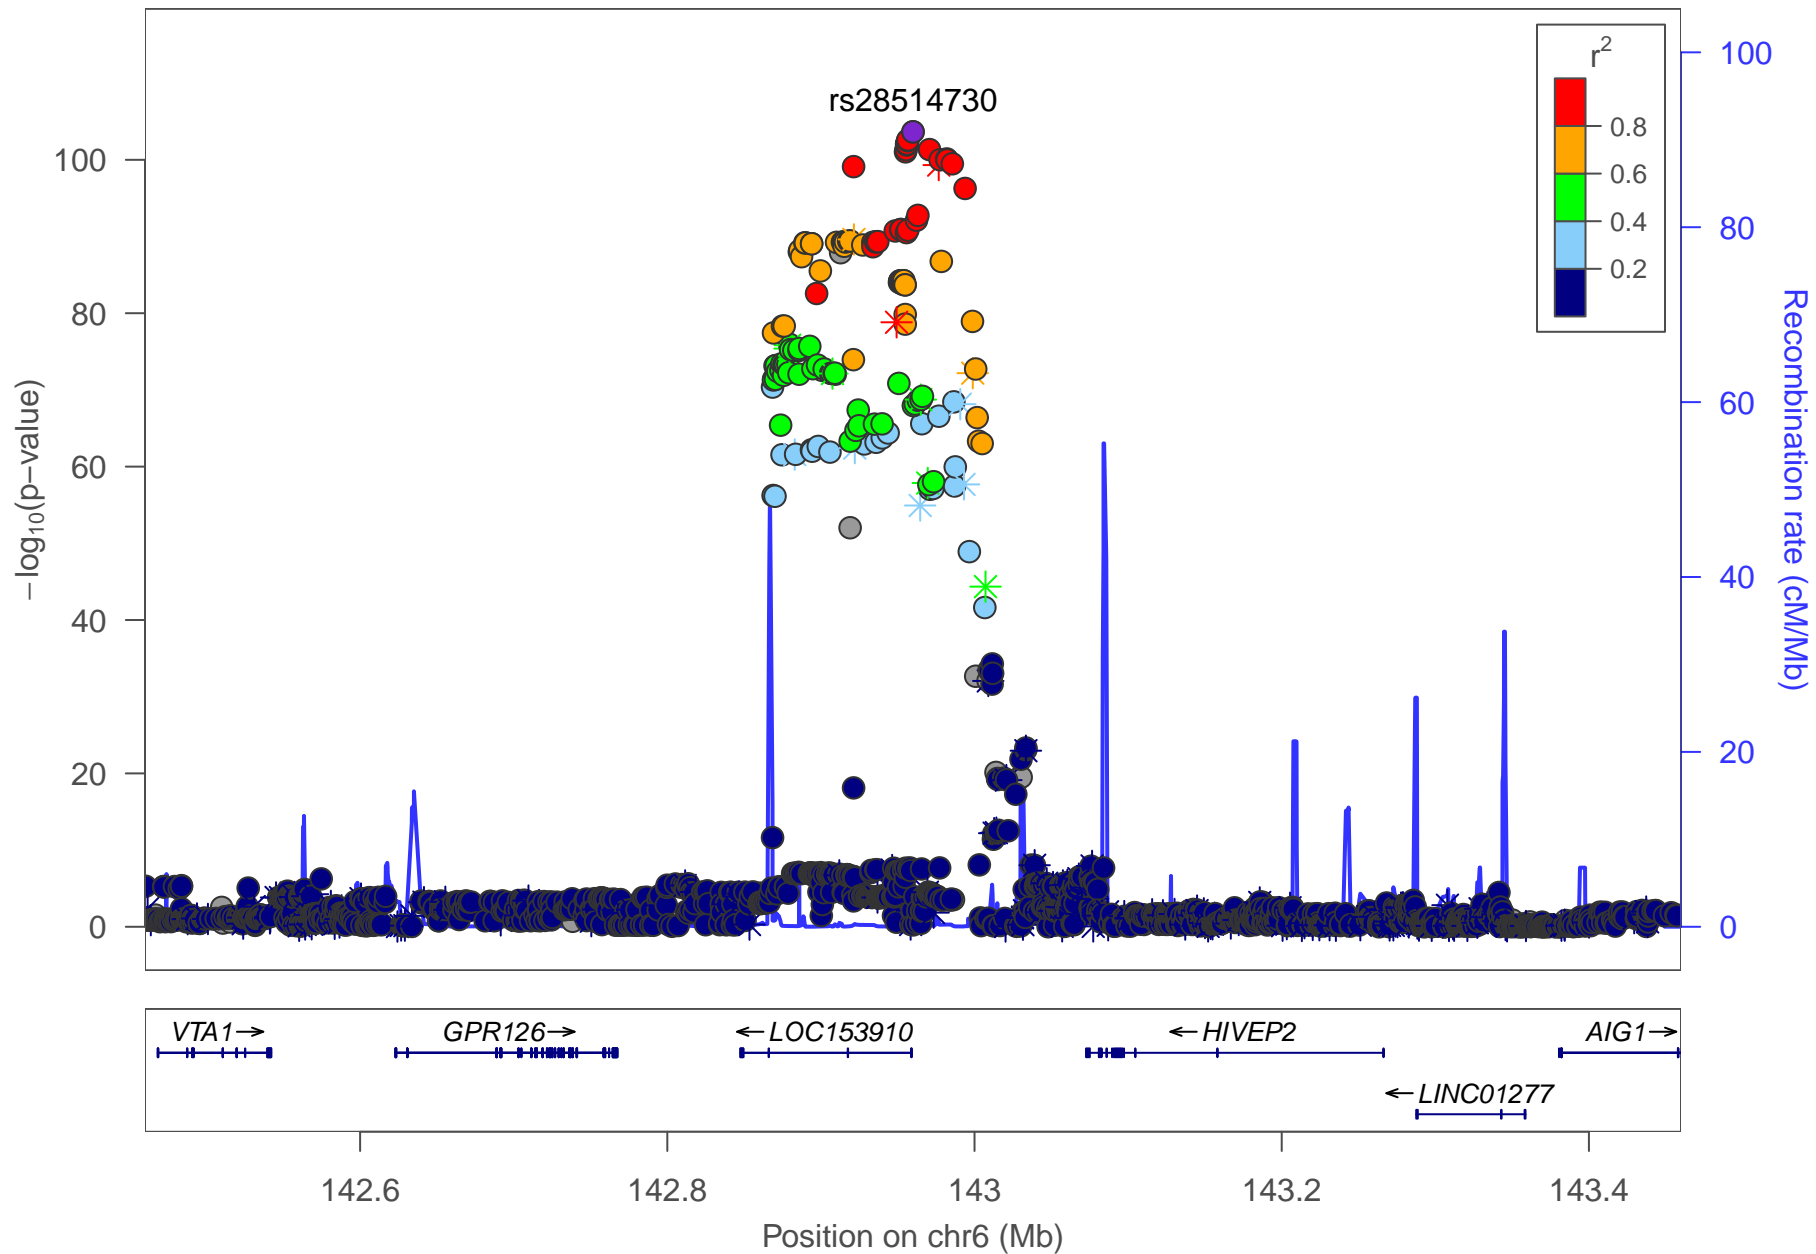

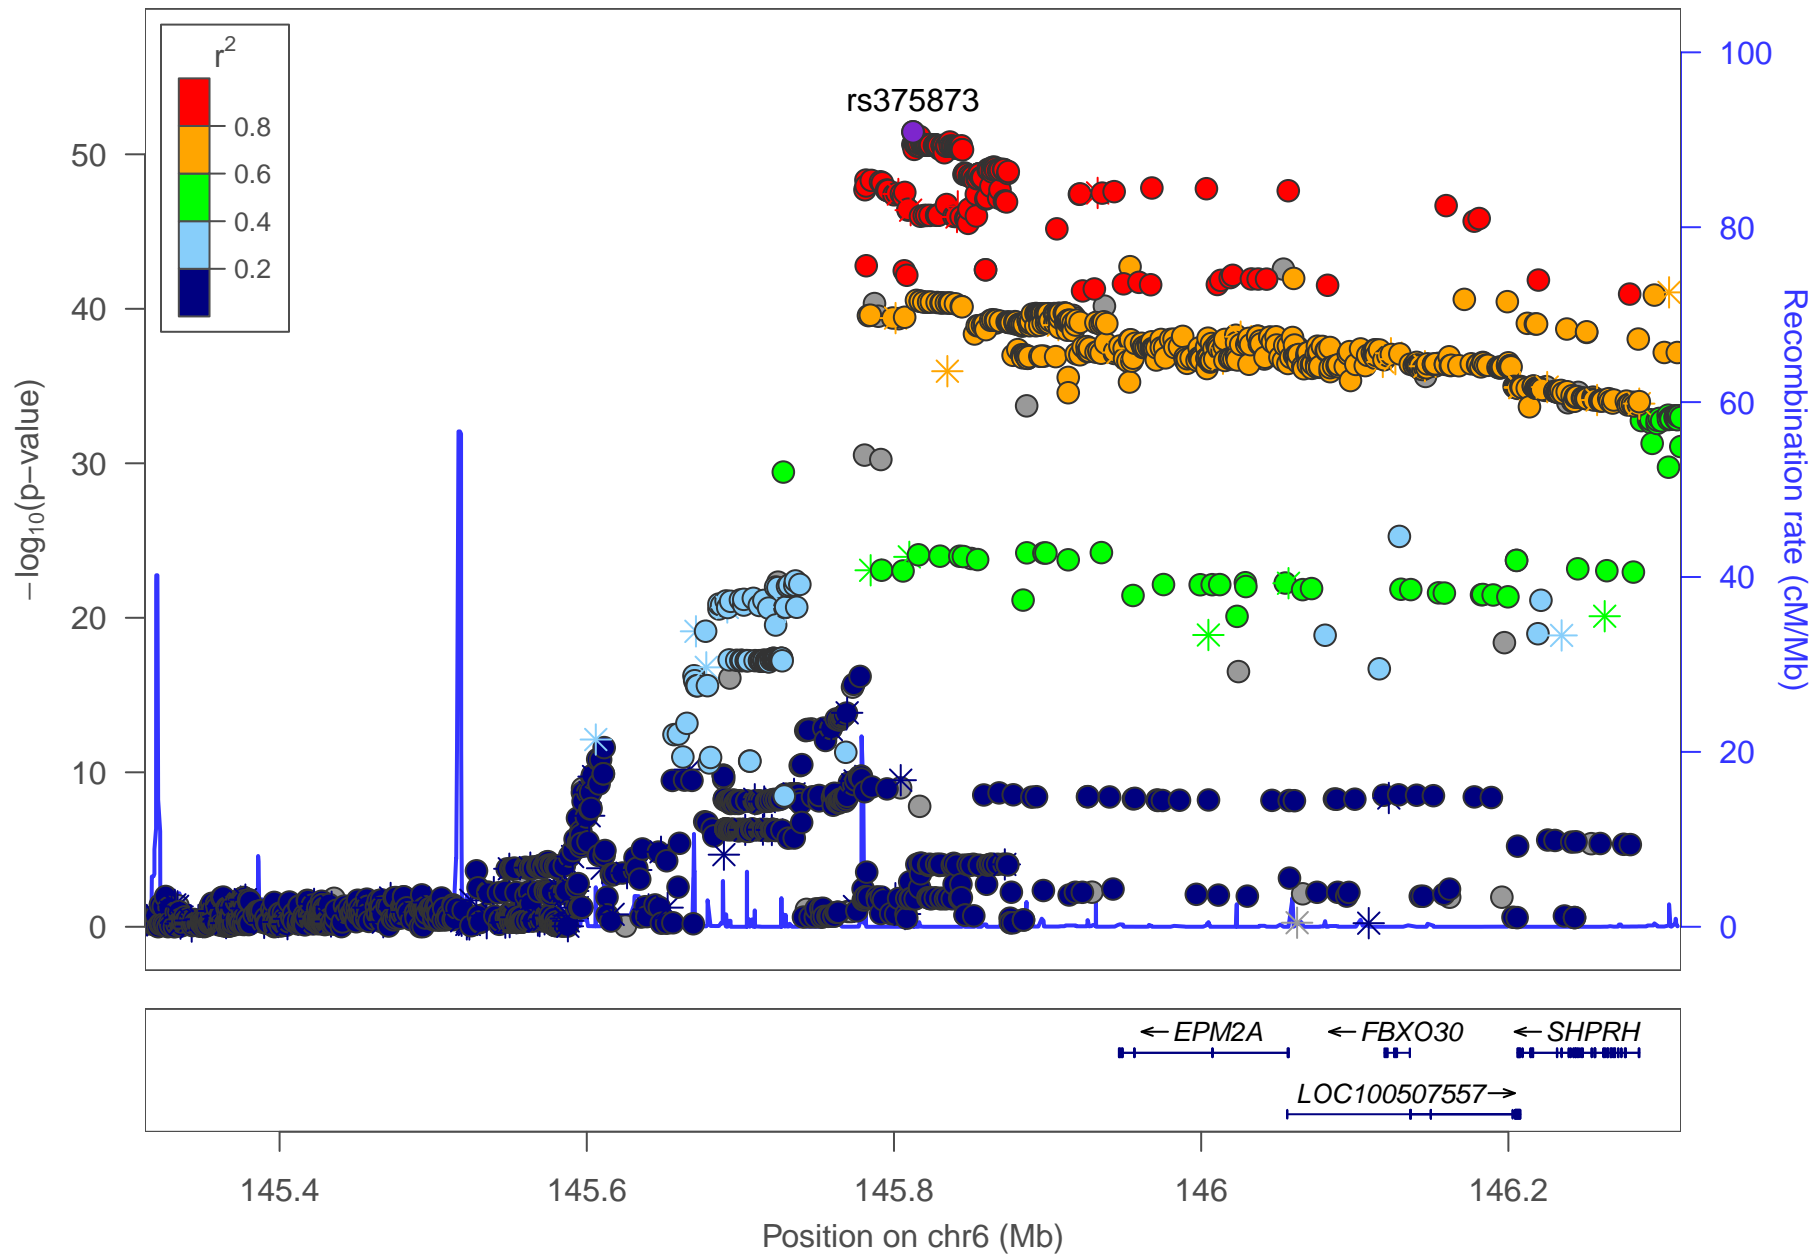

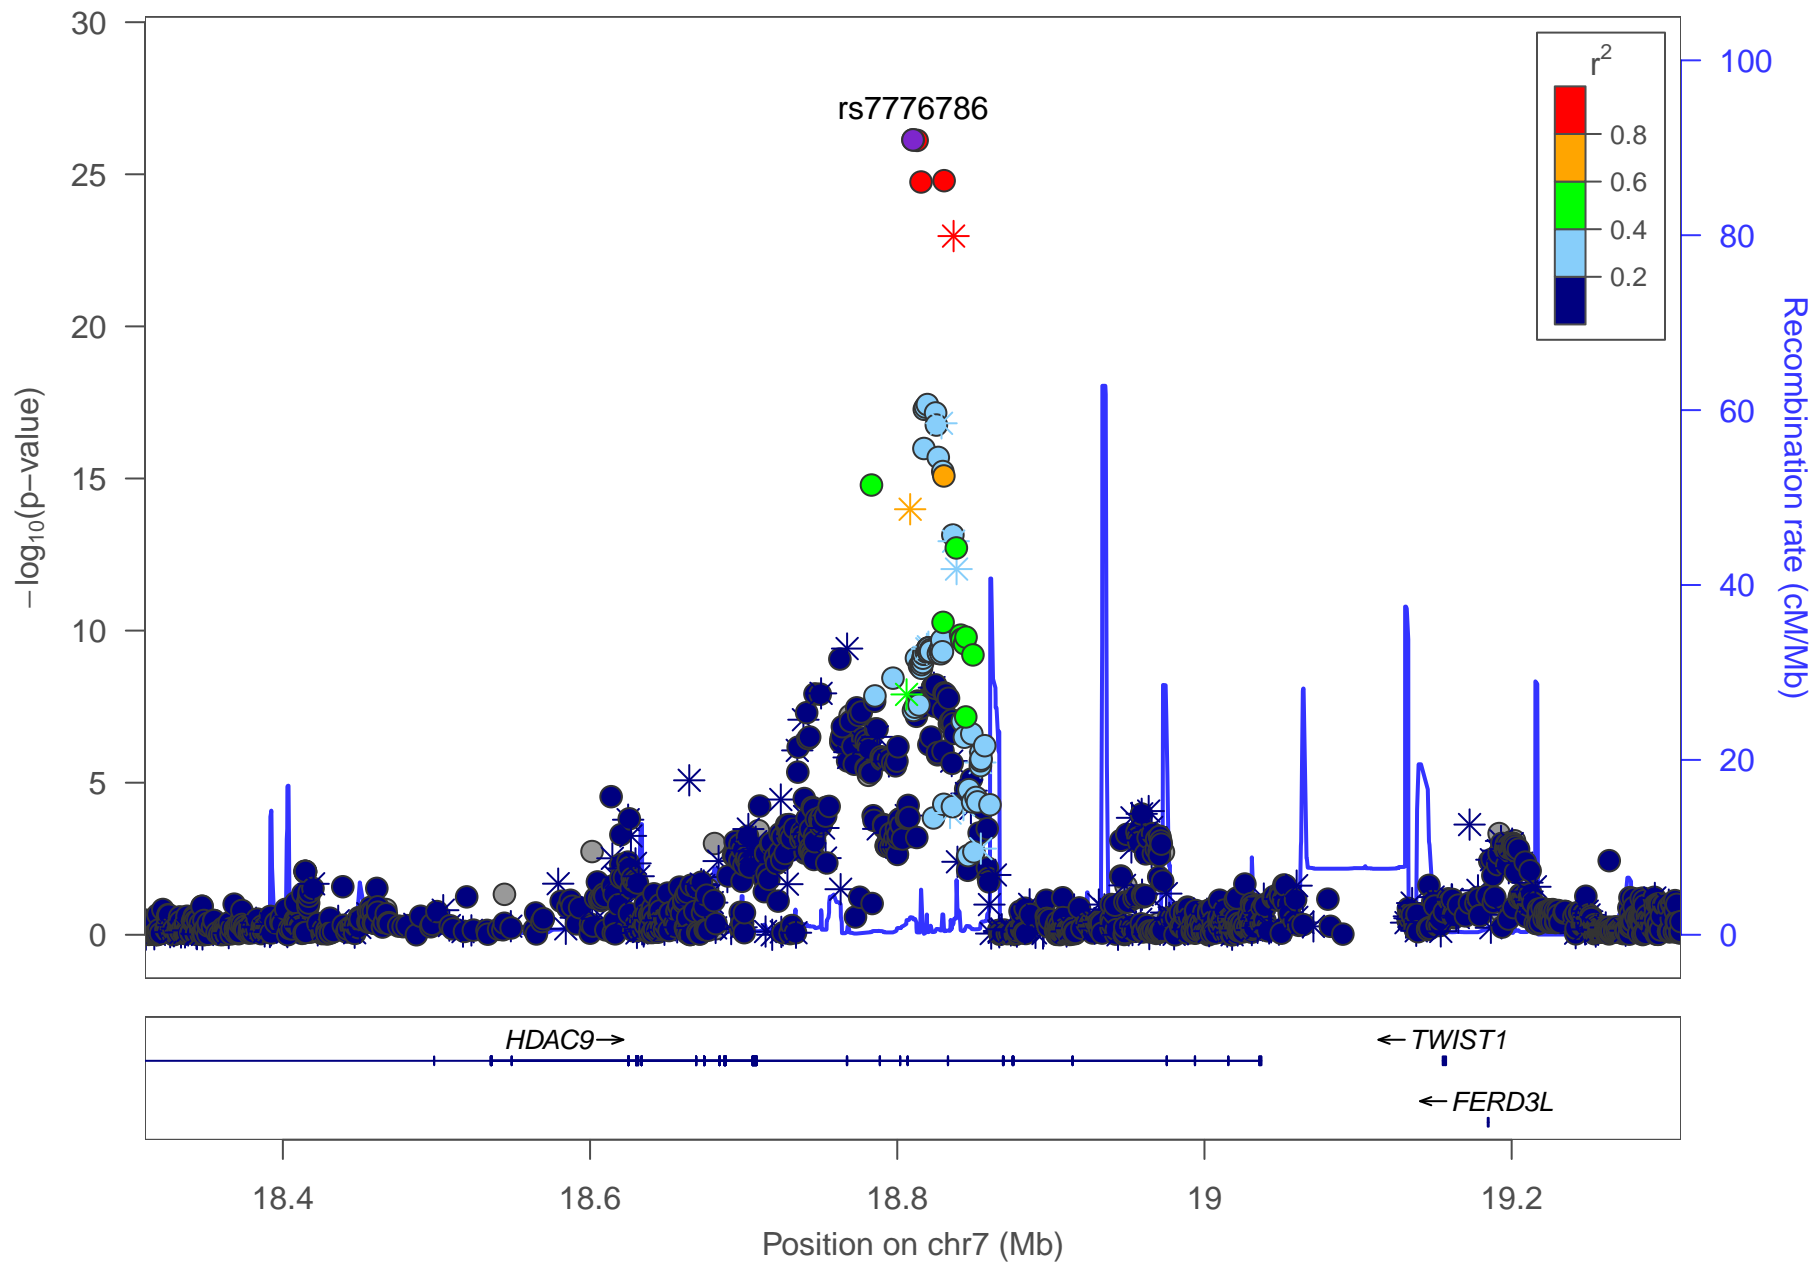

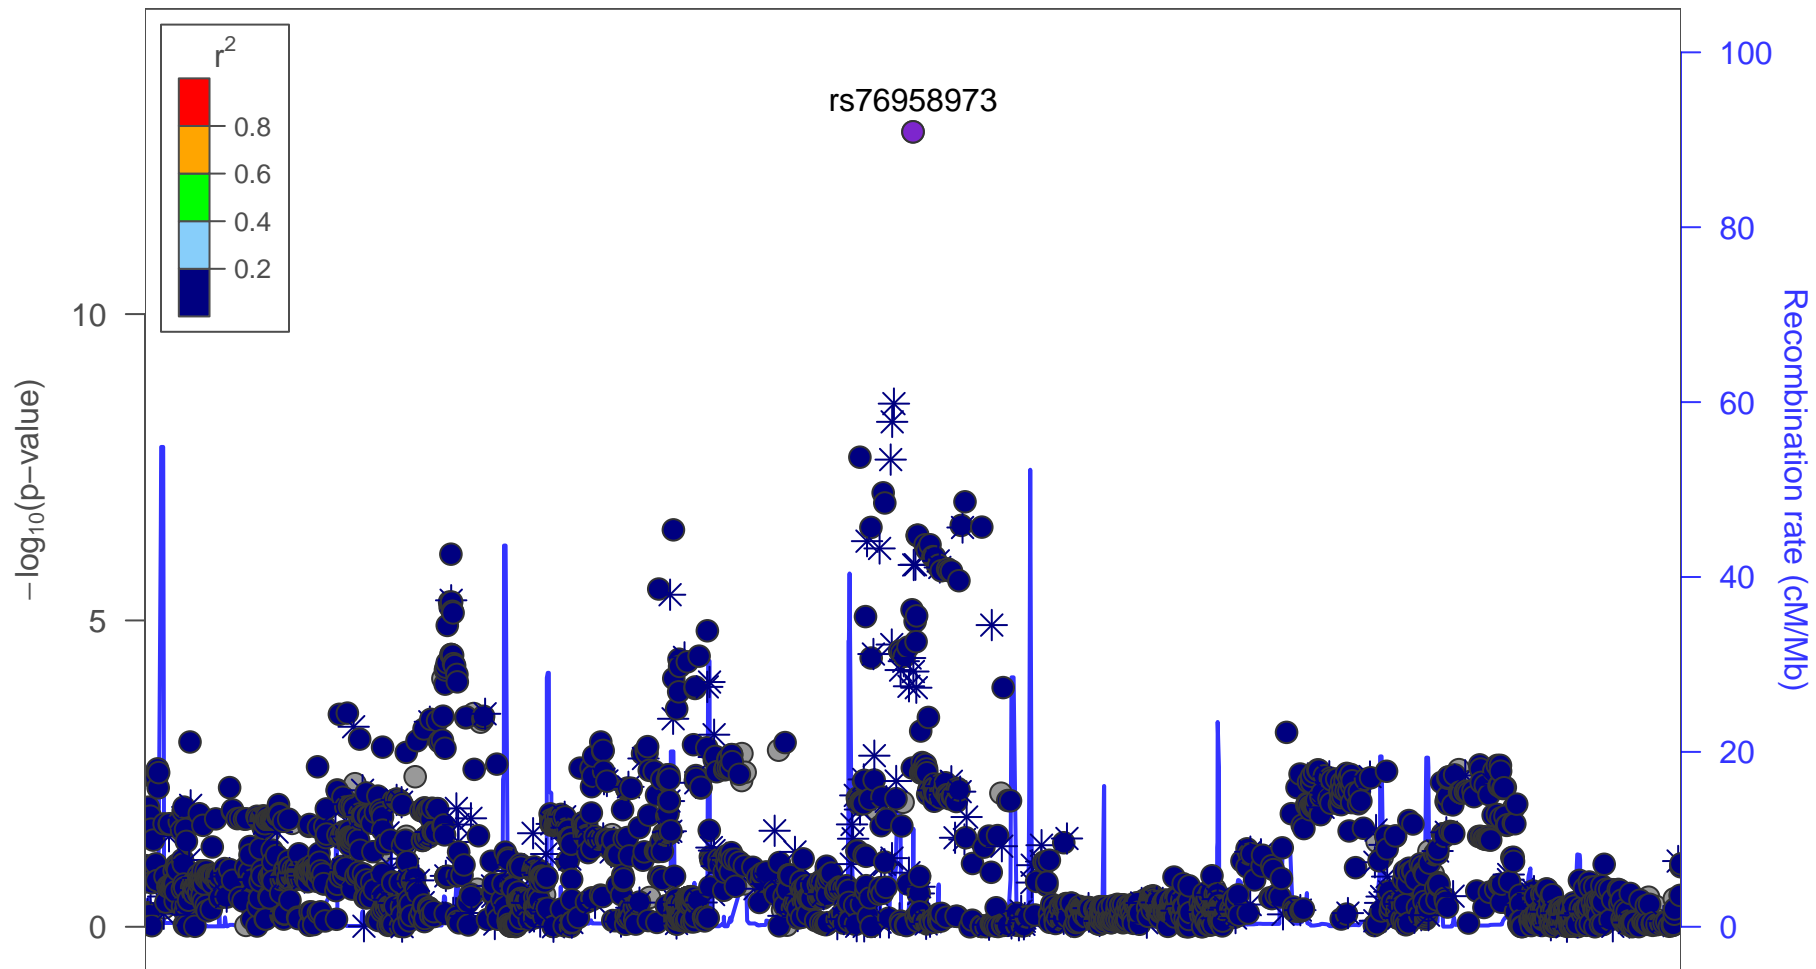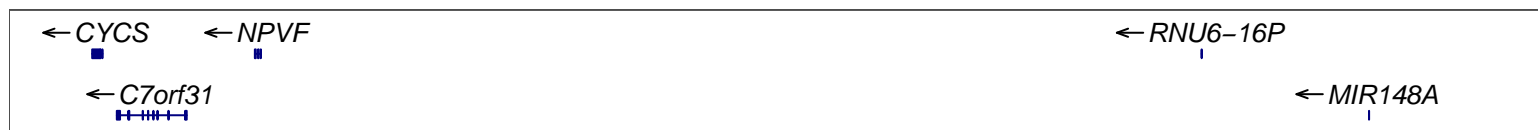

25.2

25.4

25.6

25.8

26

Position on chr7 (Mb)

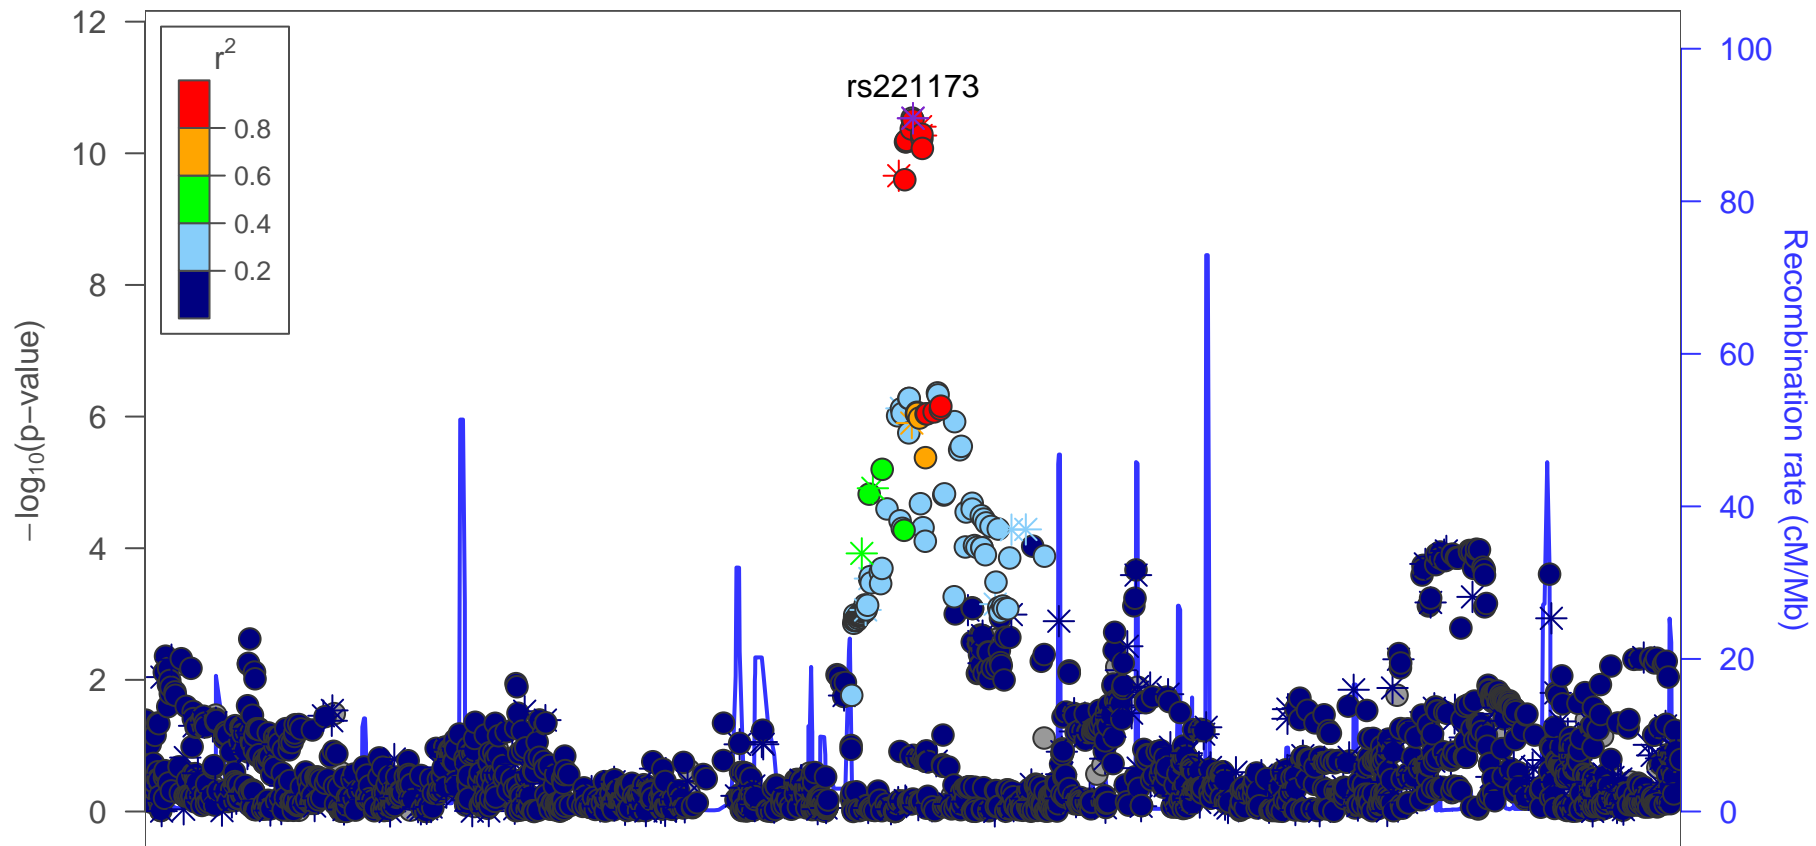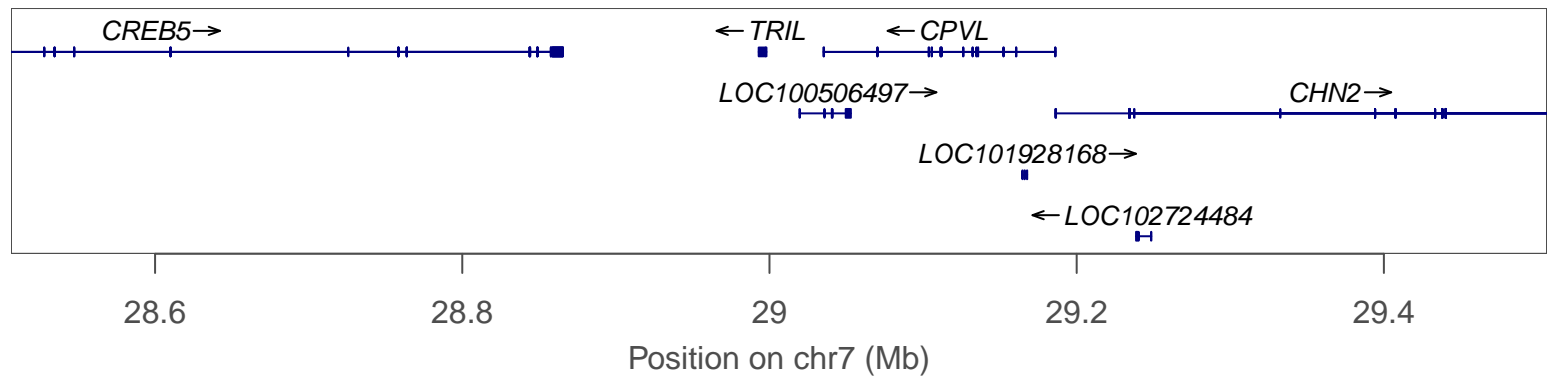



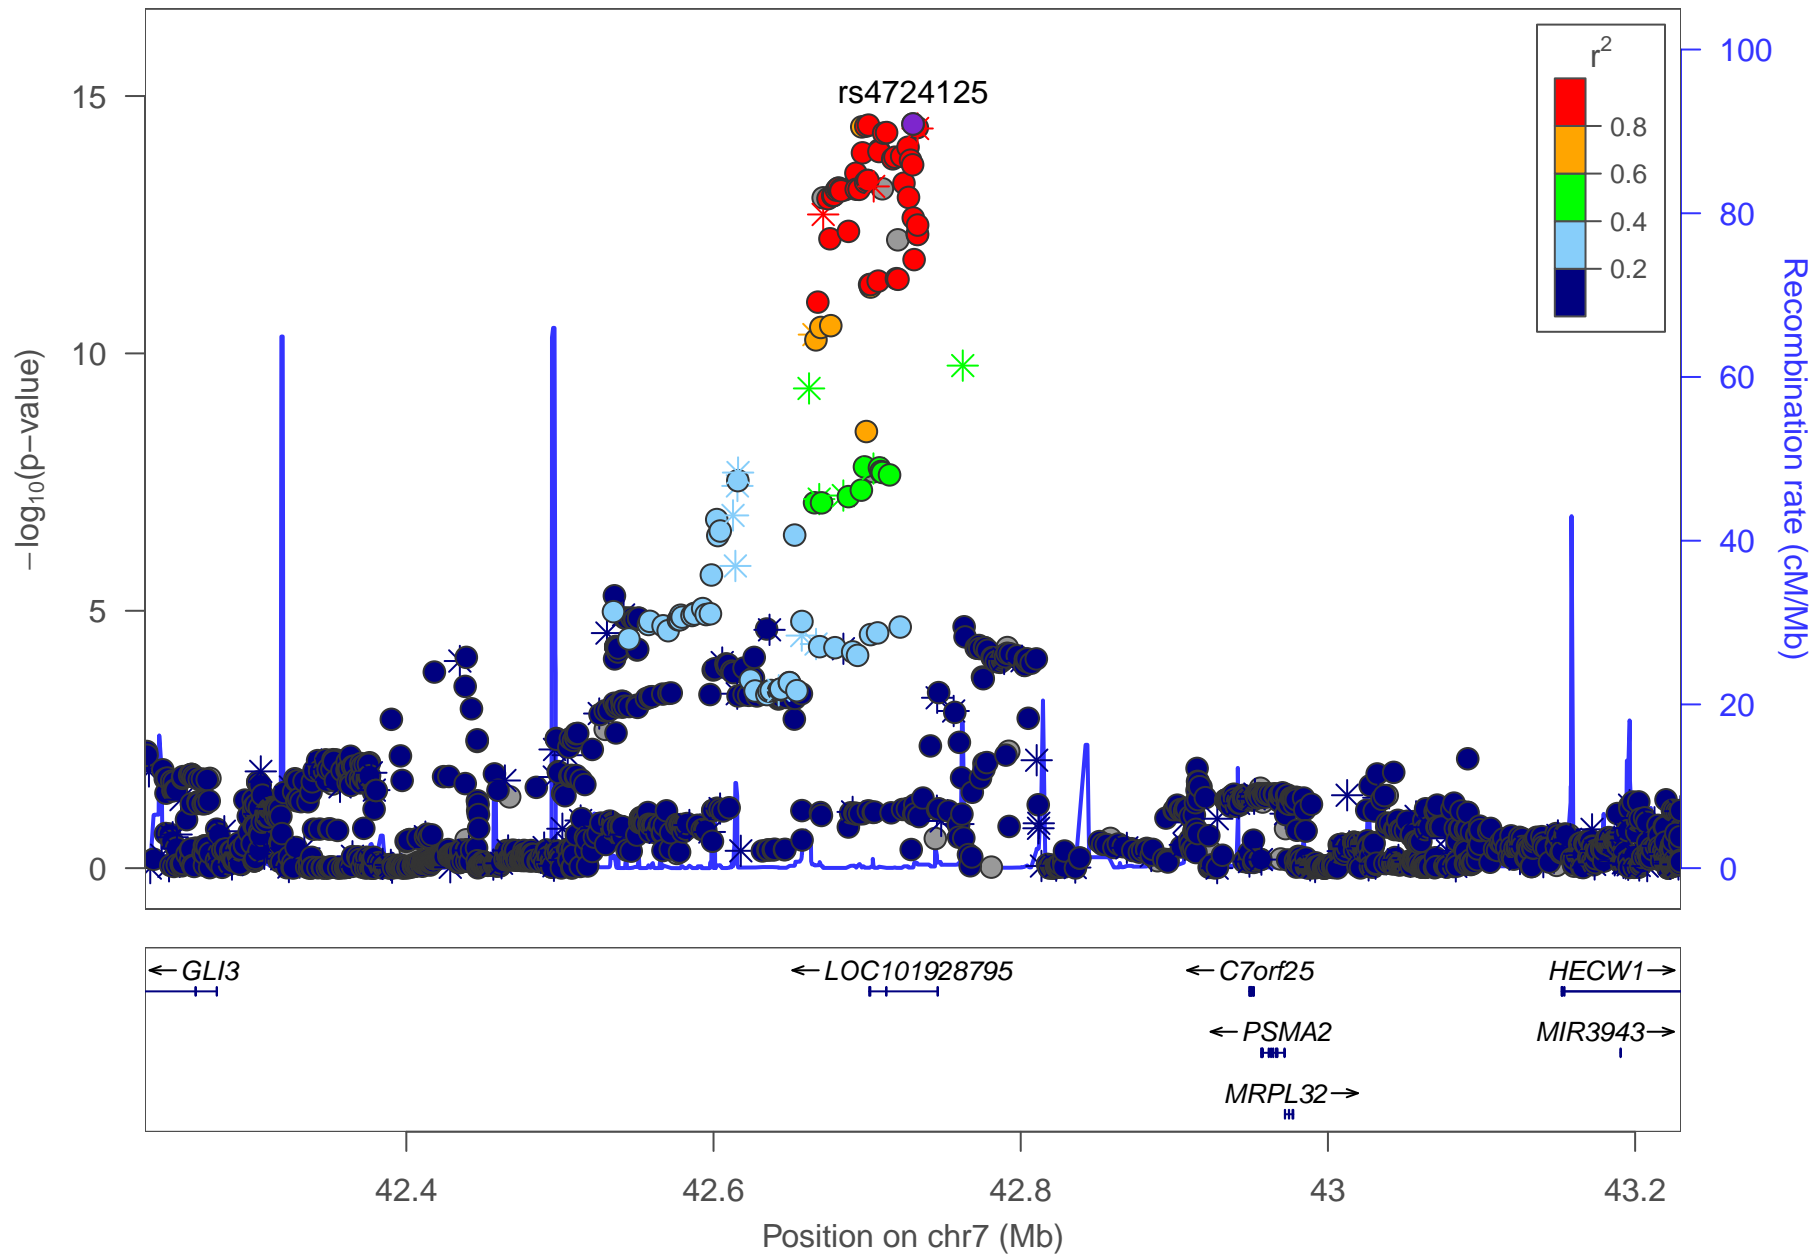

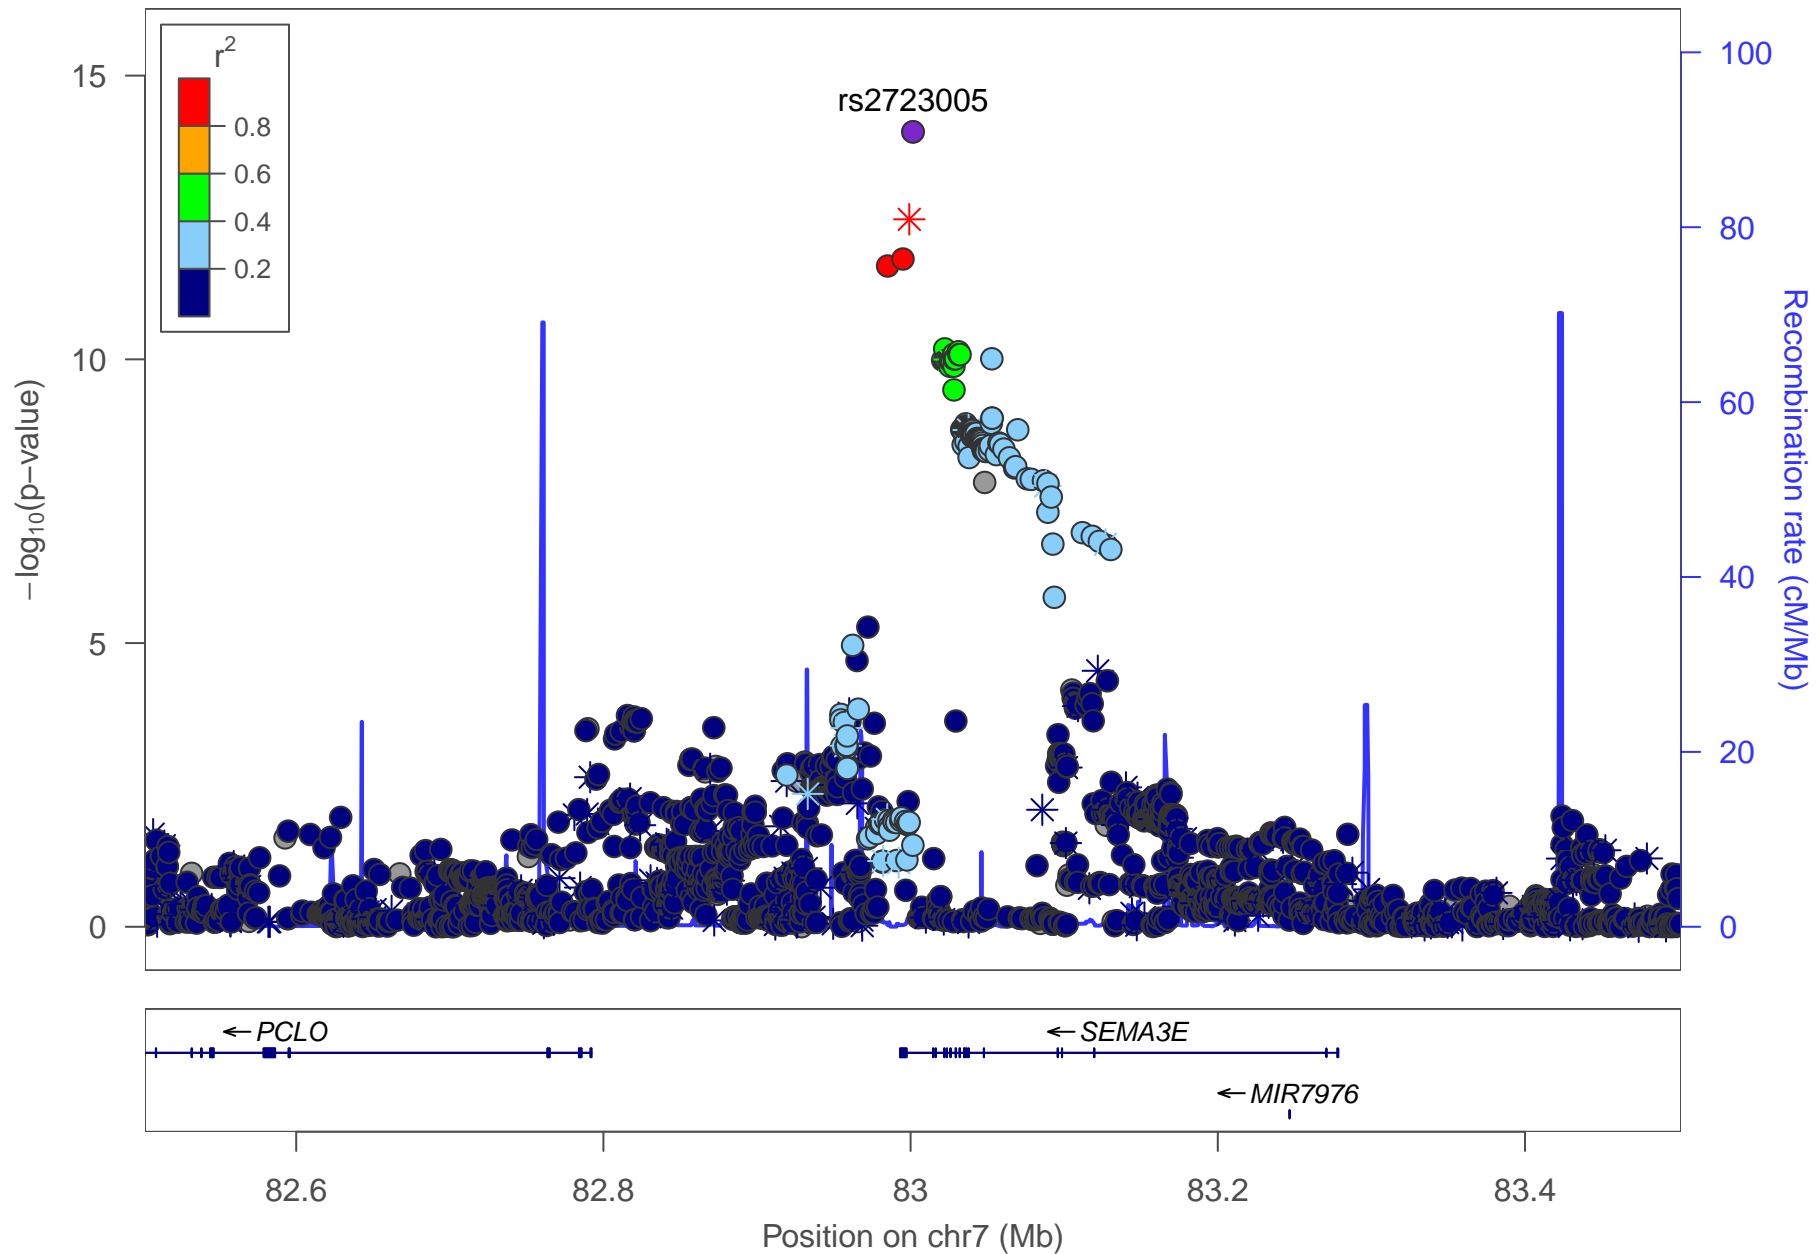

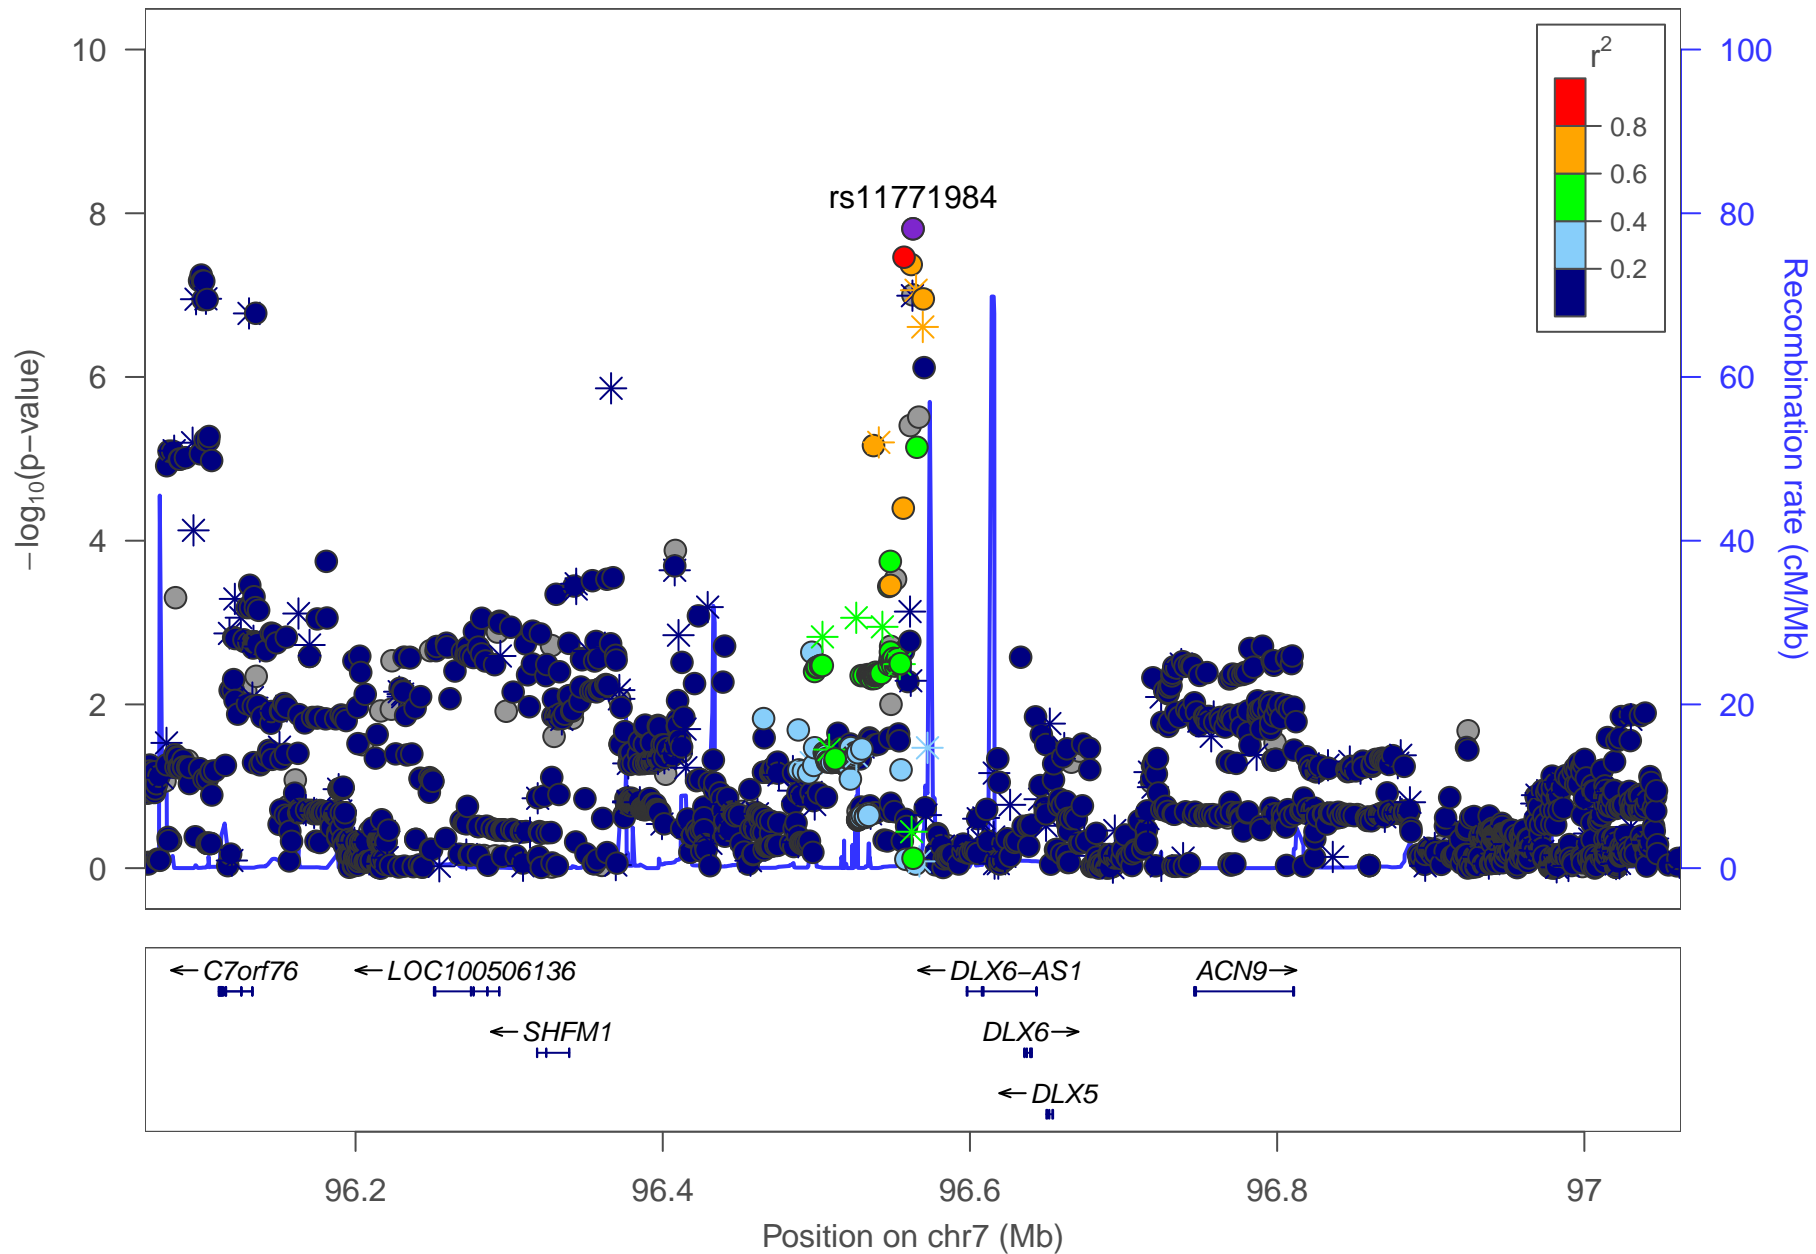

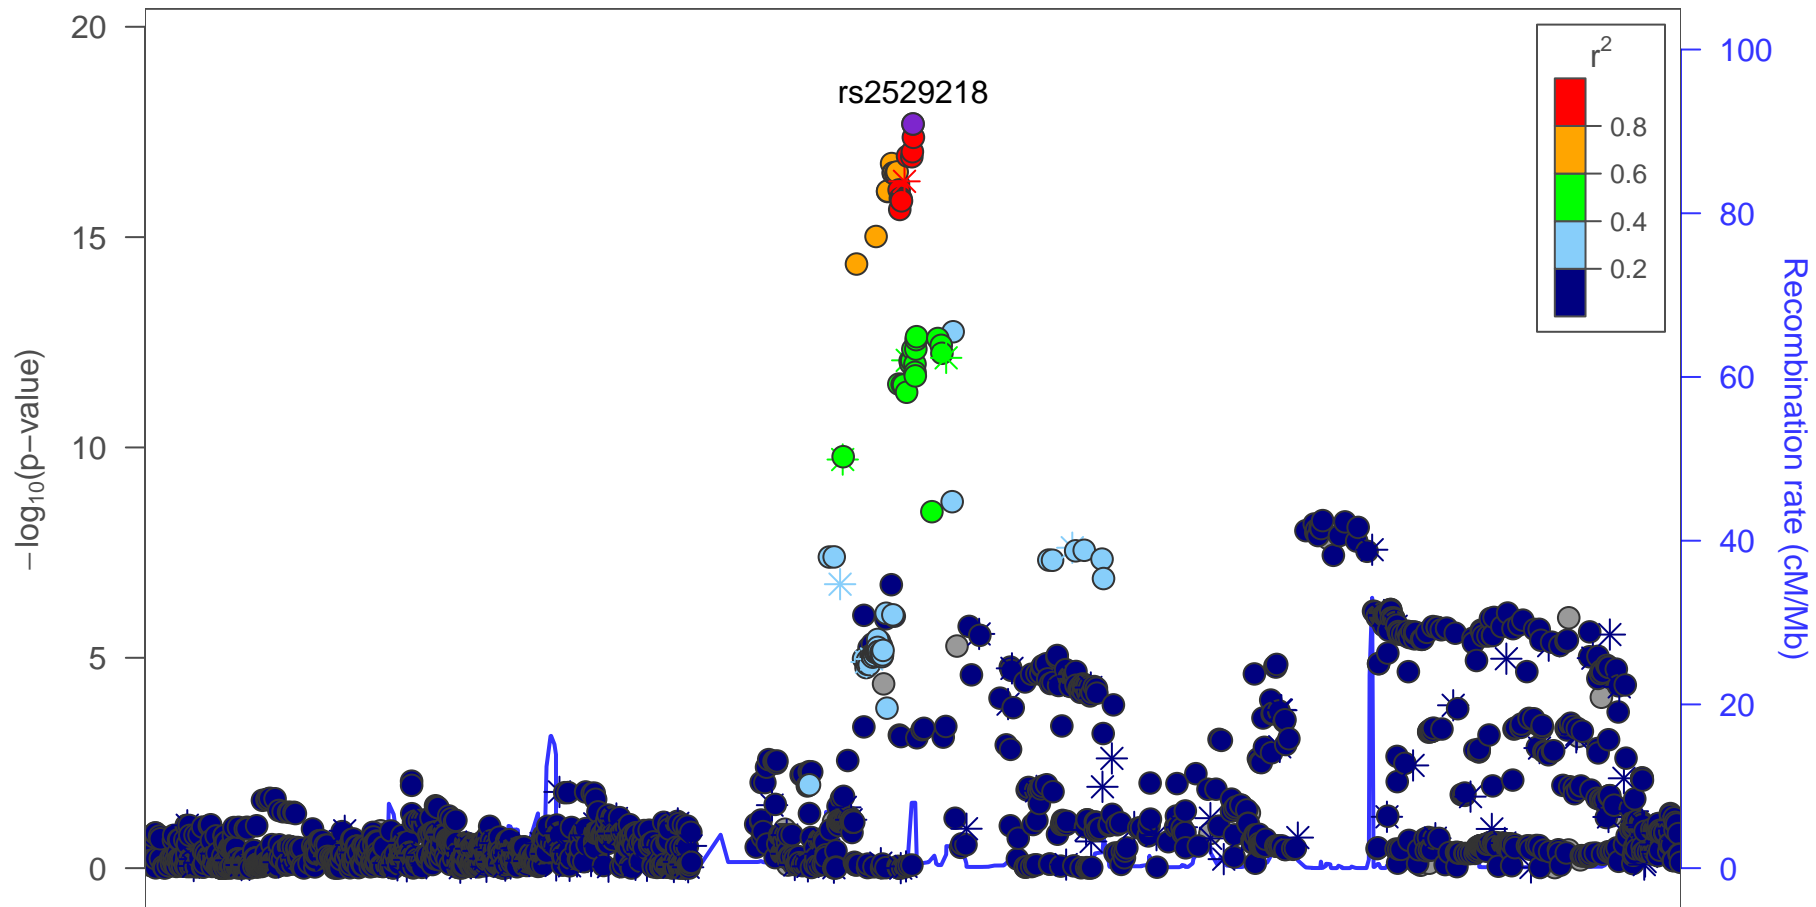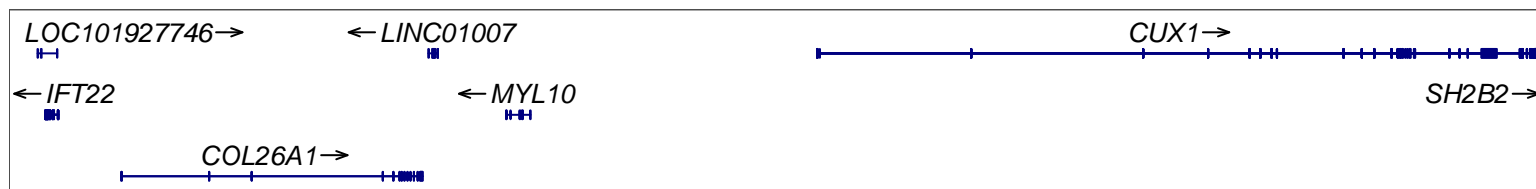

101                      101.2                      101.4                      101.6                      101.8

Position on chr7 (Mb)

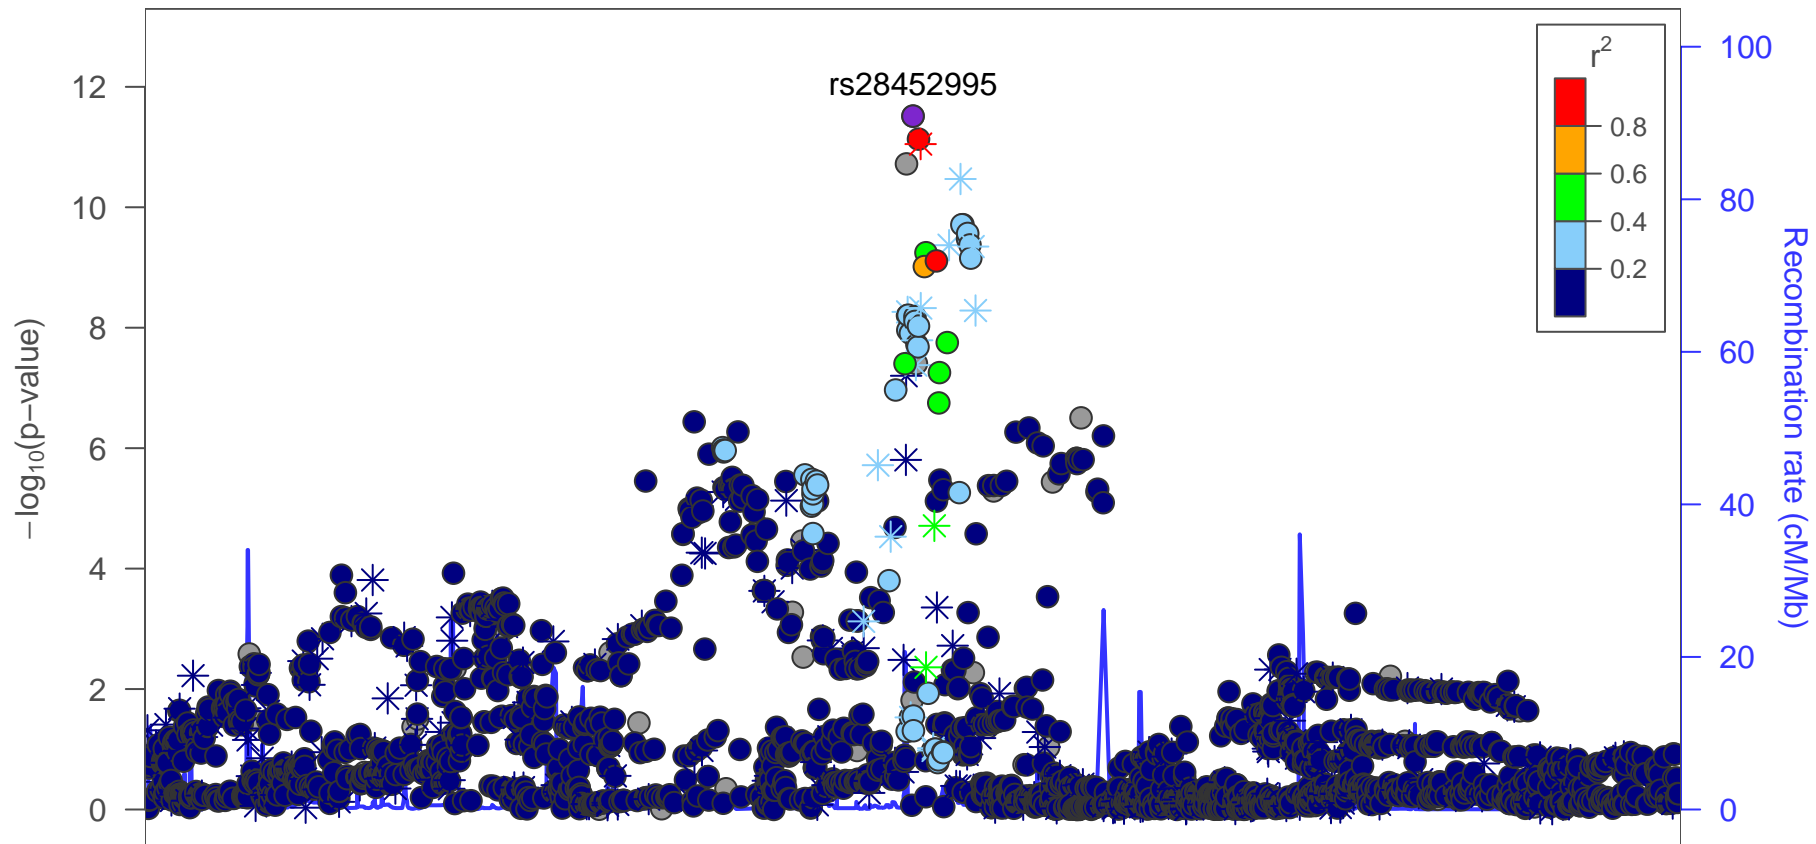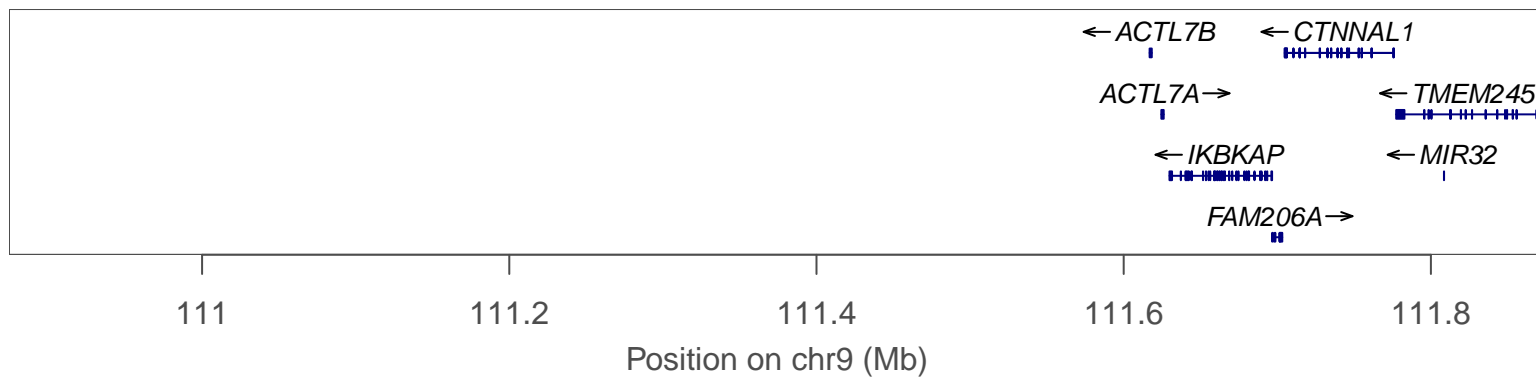

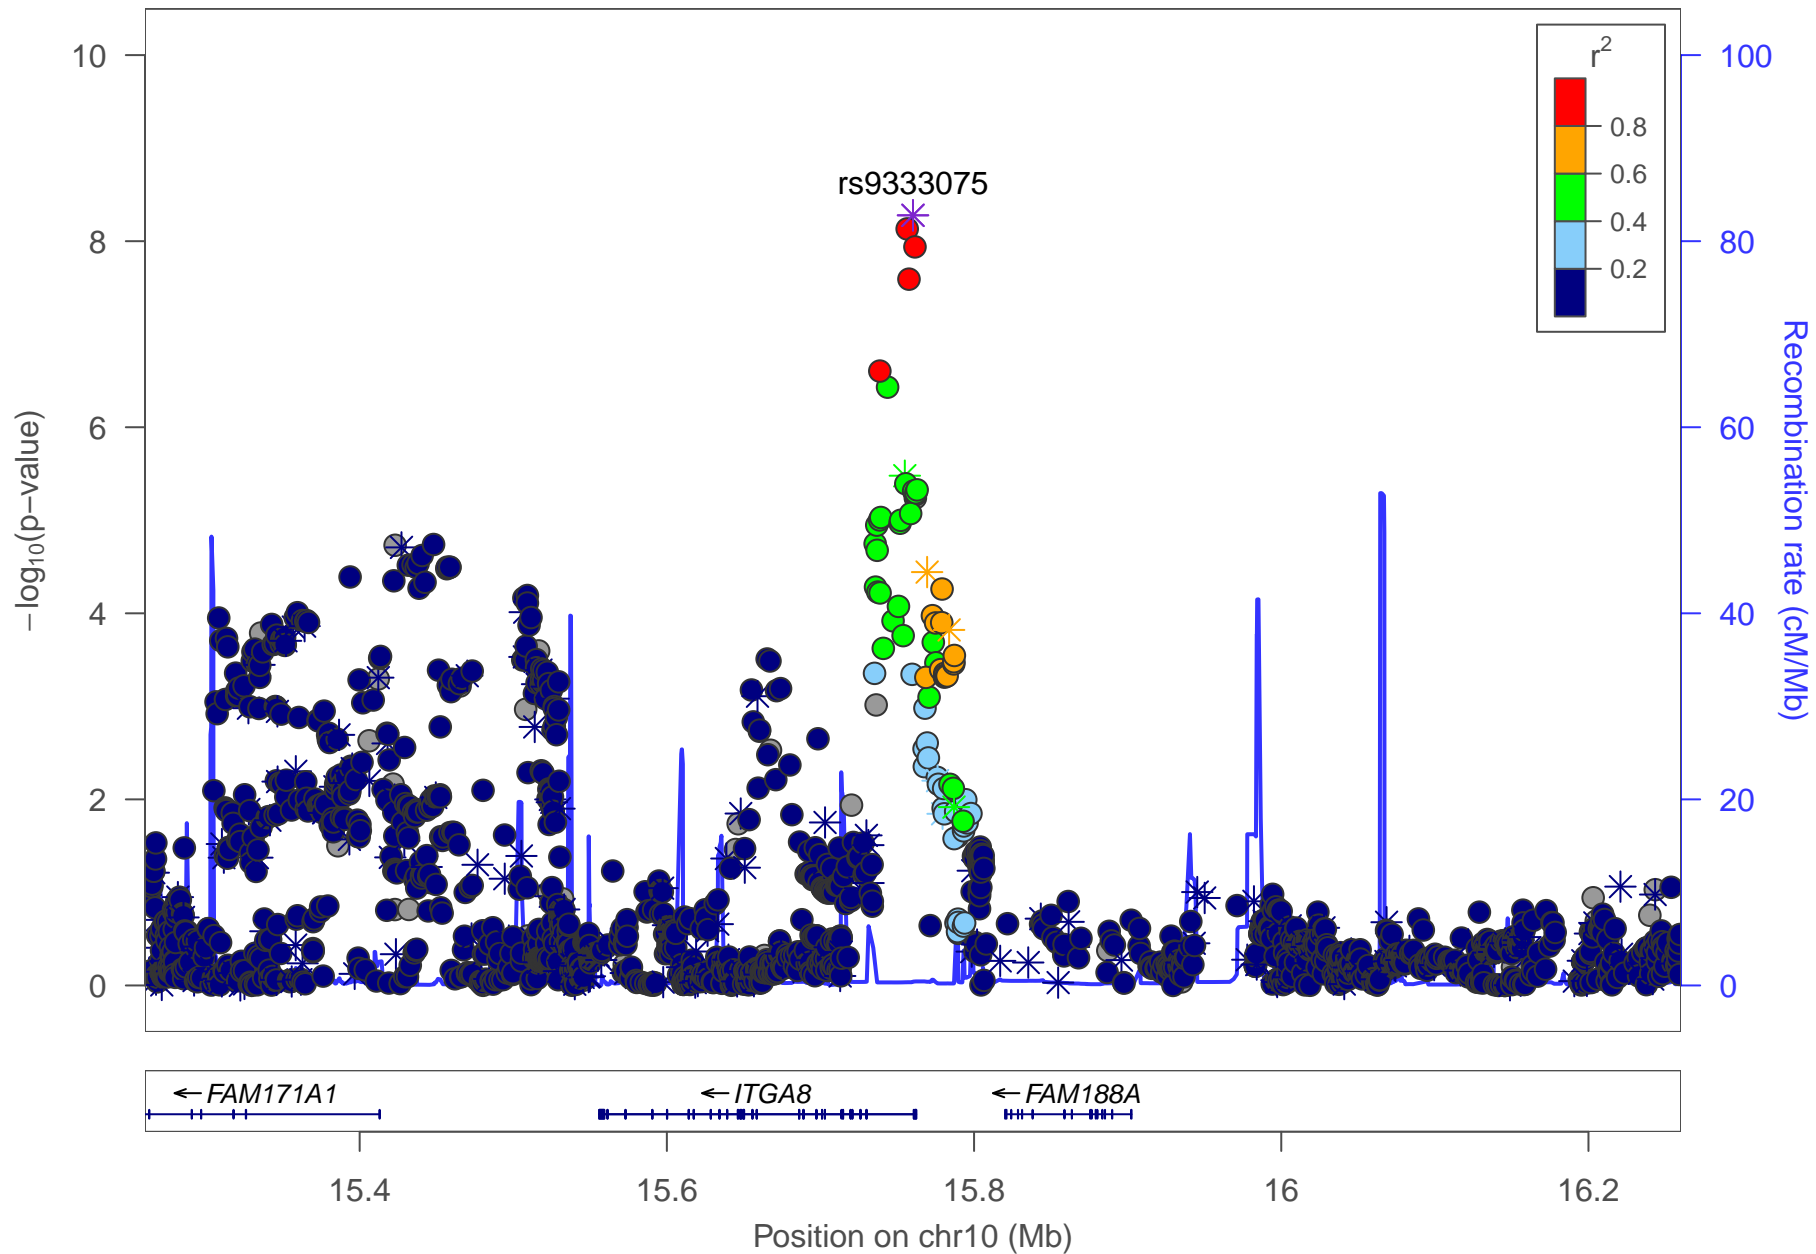

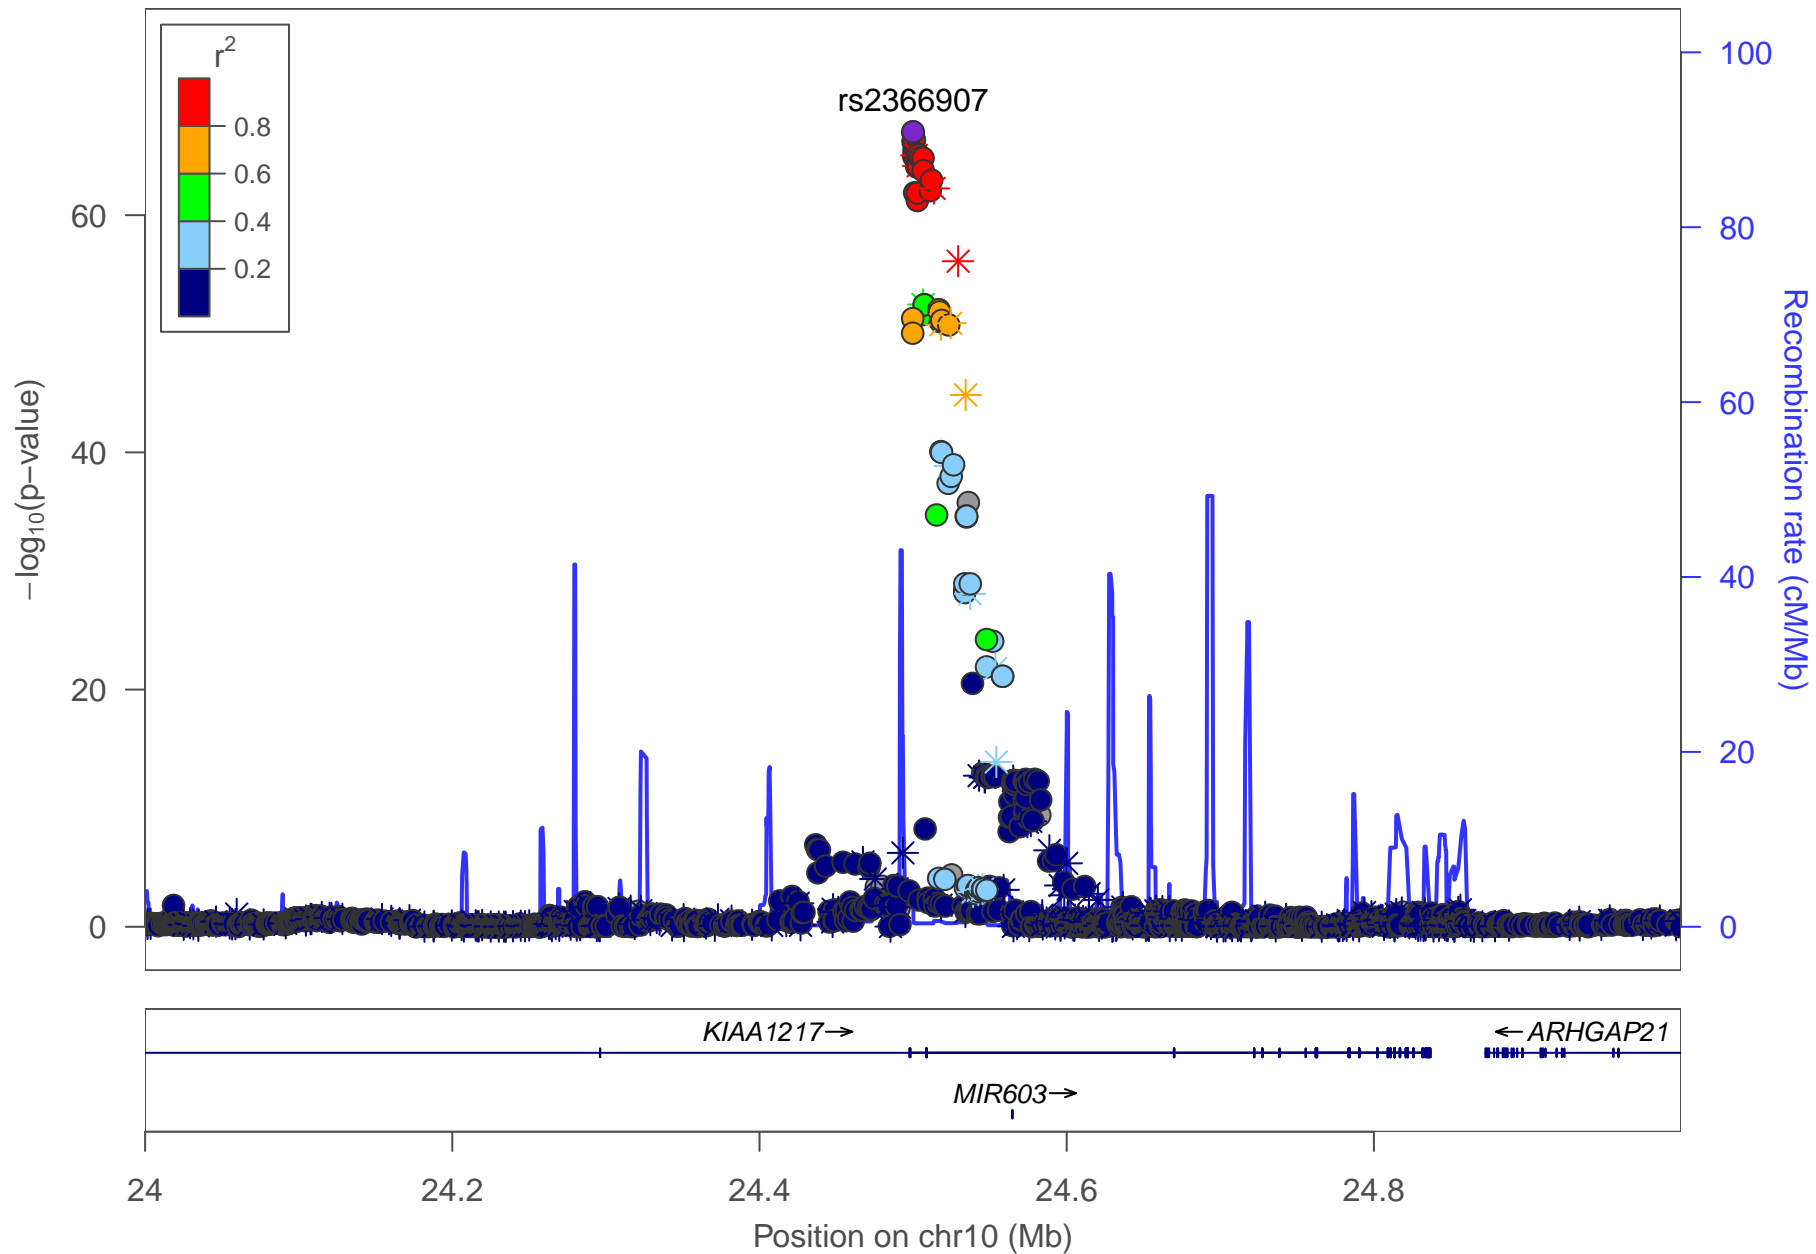

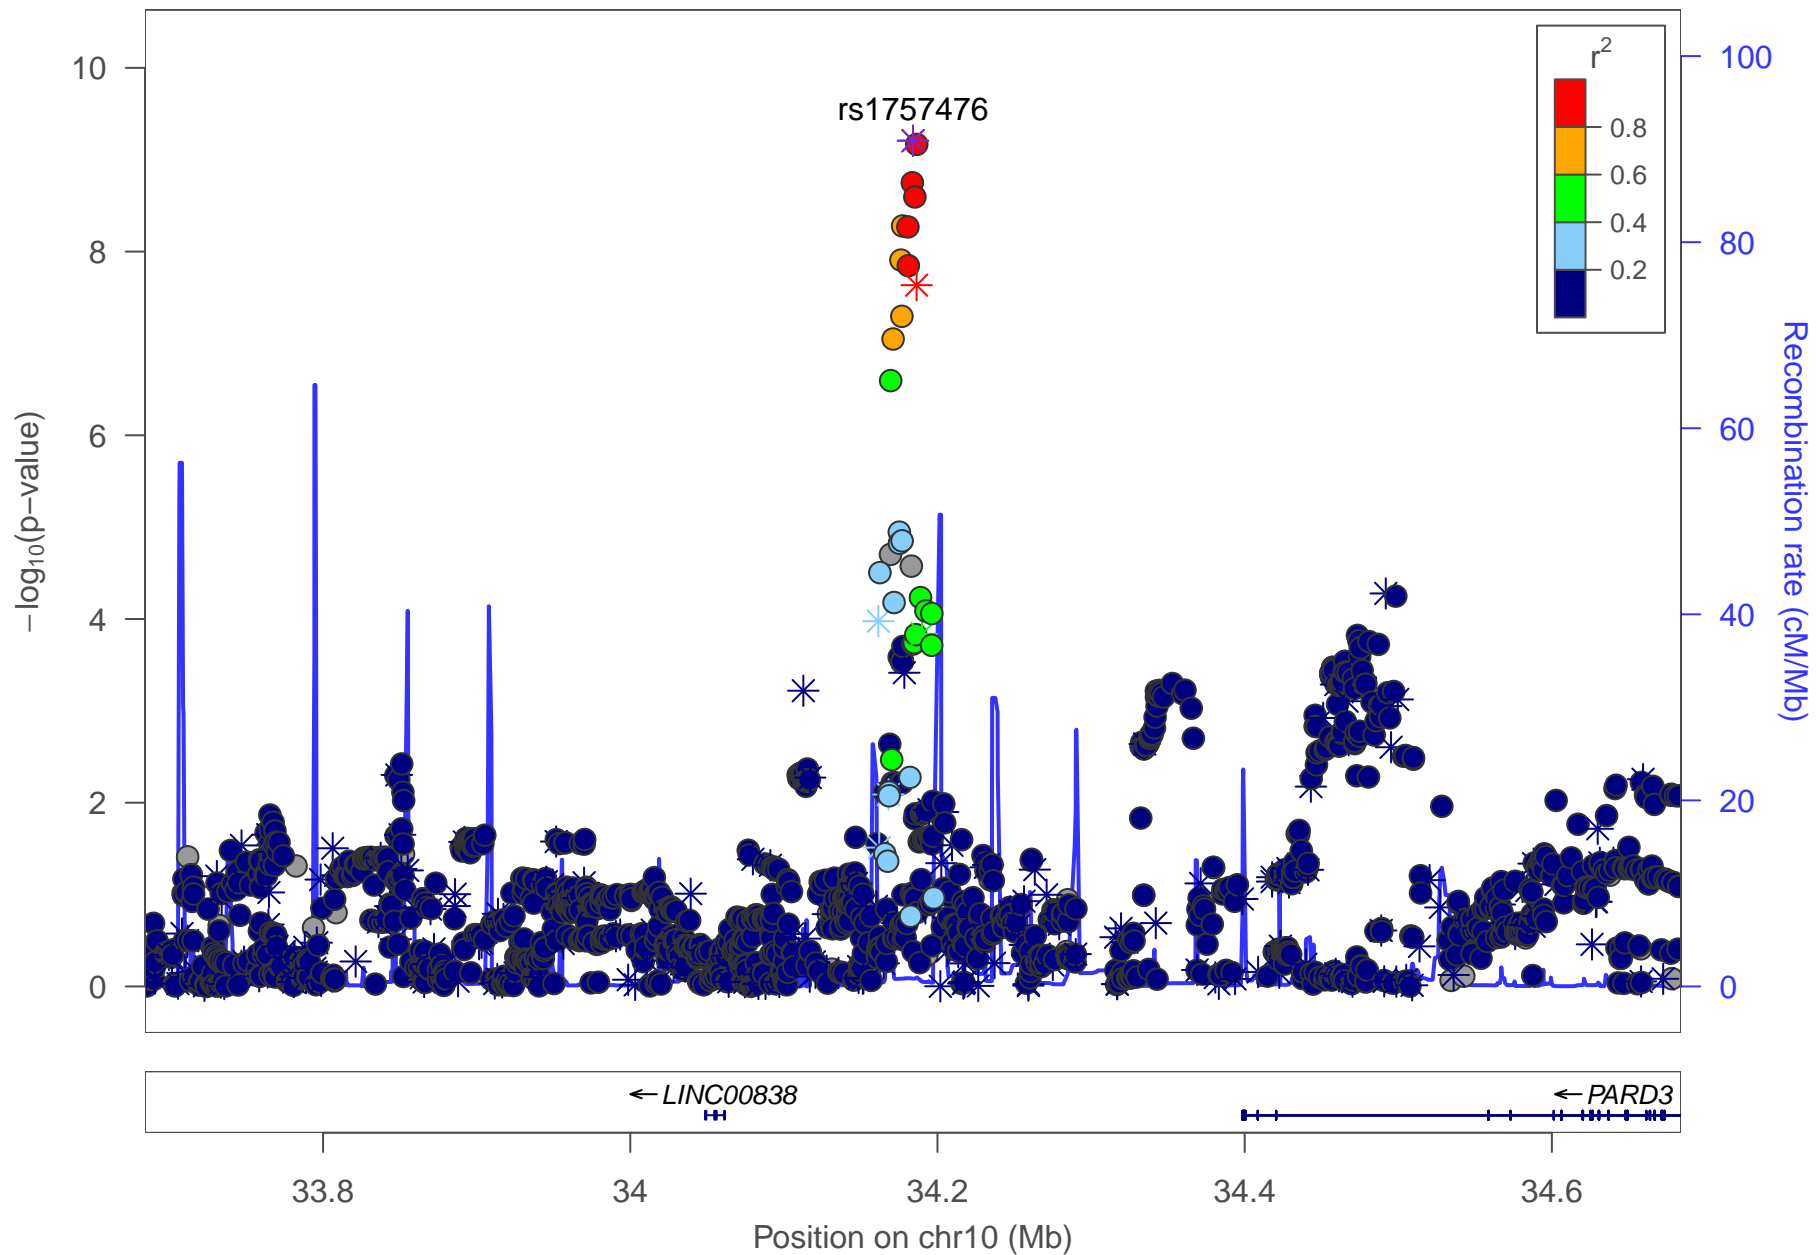



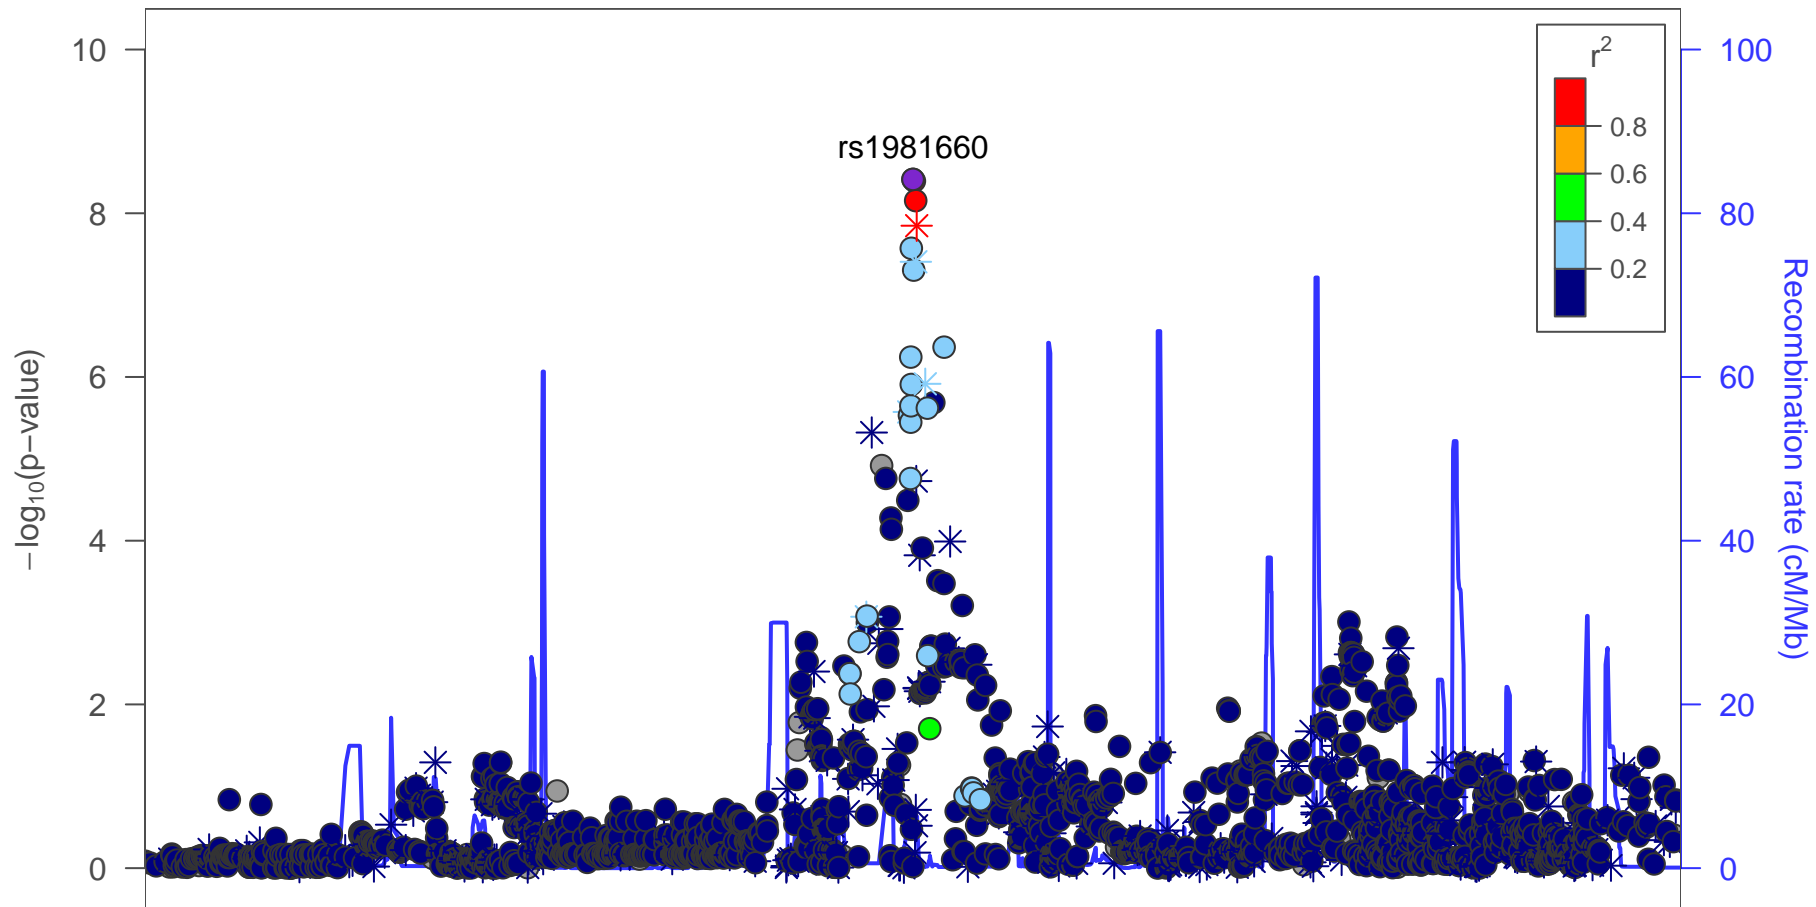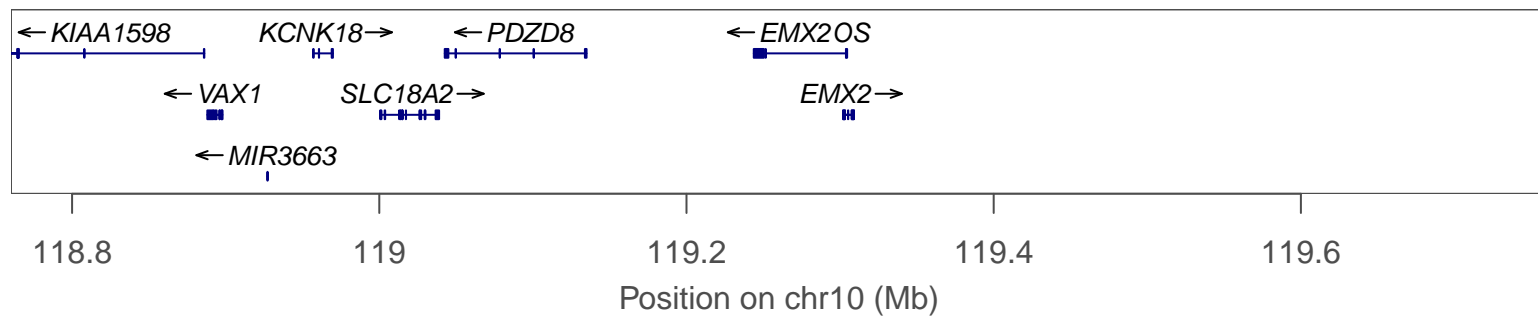

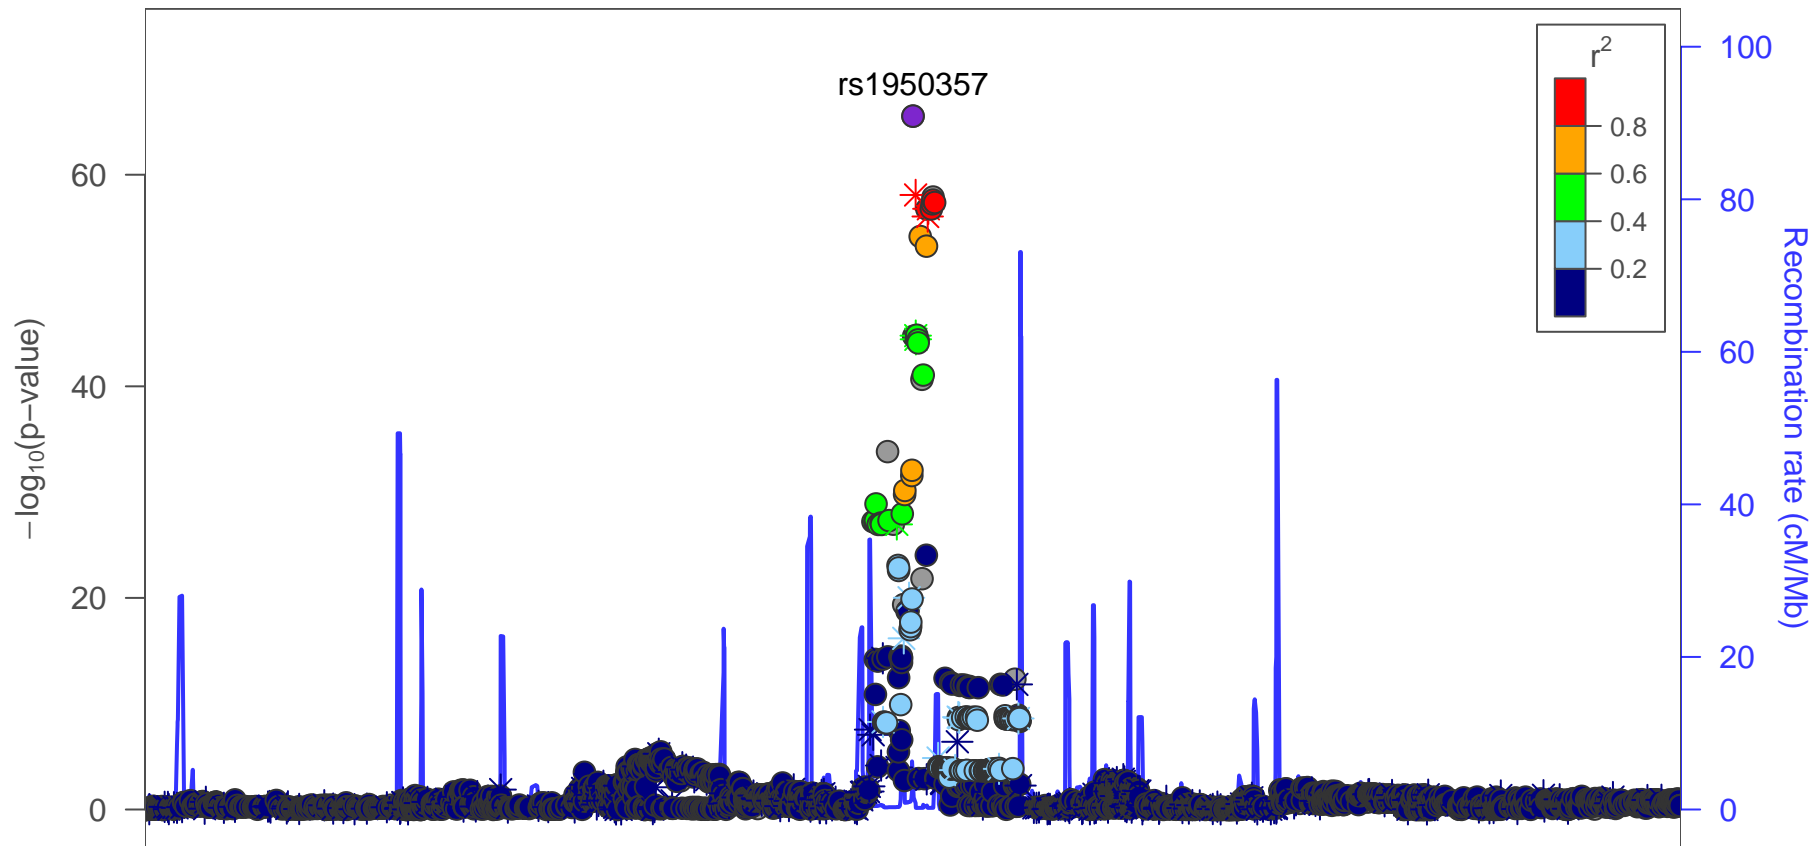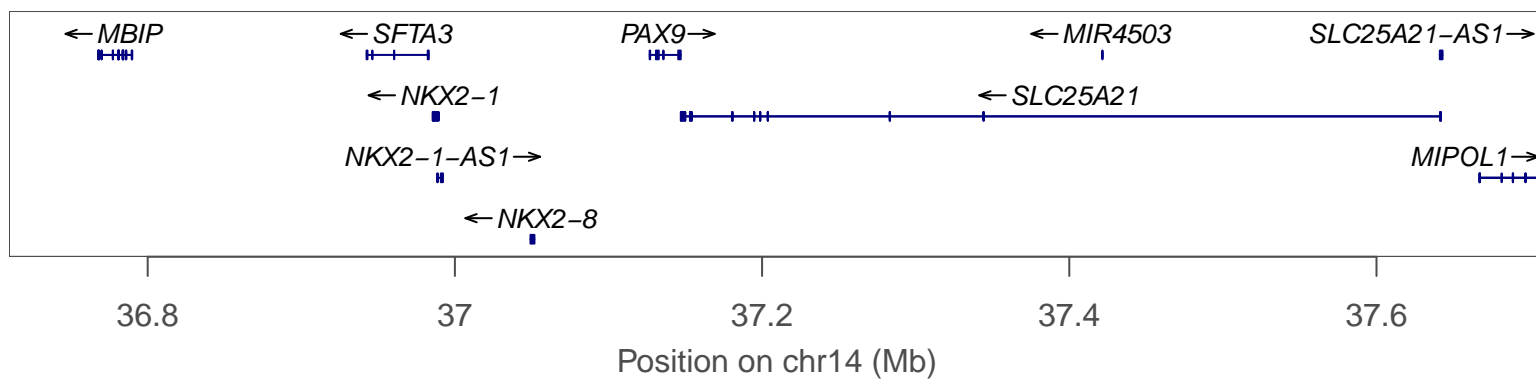

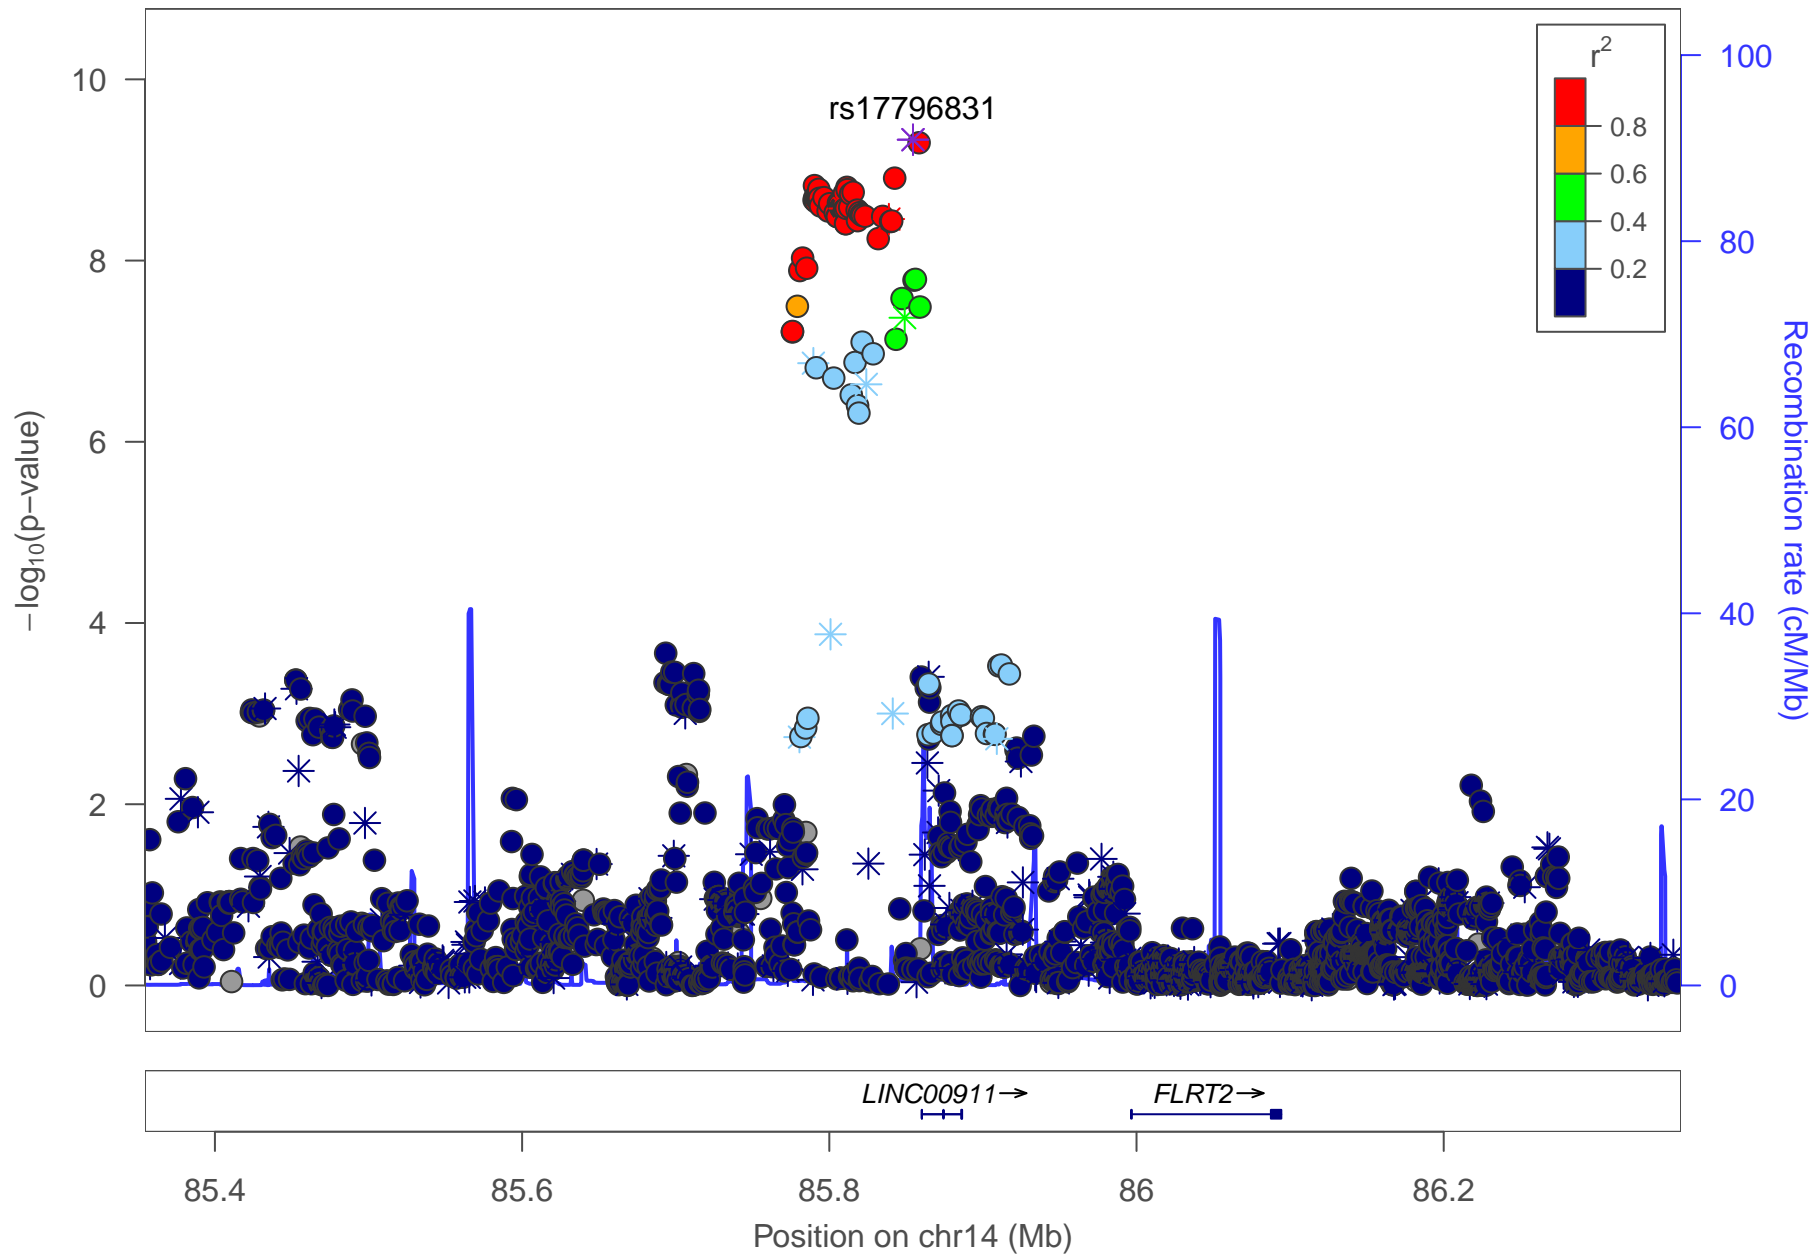

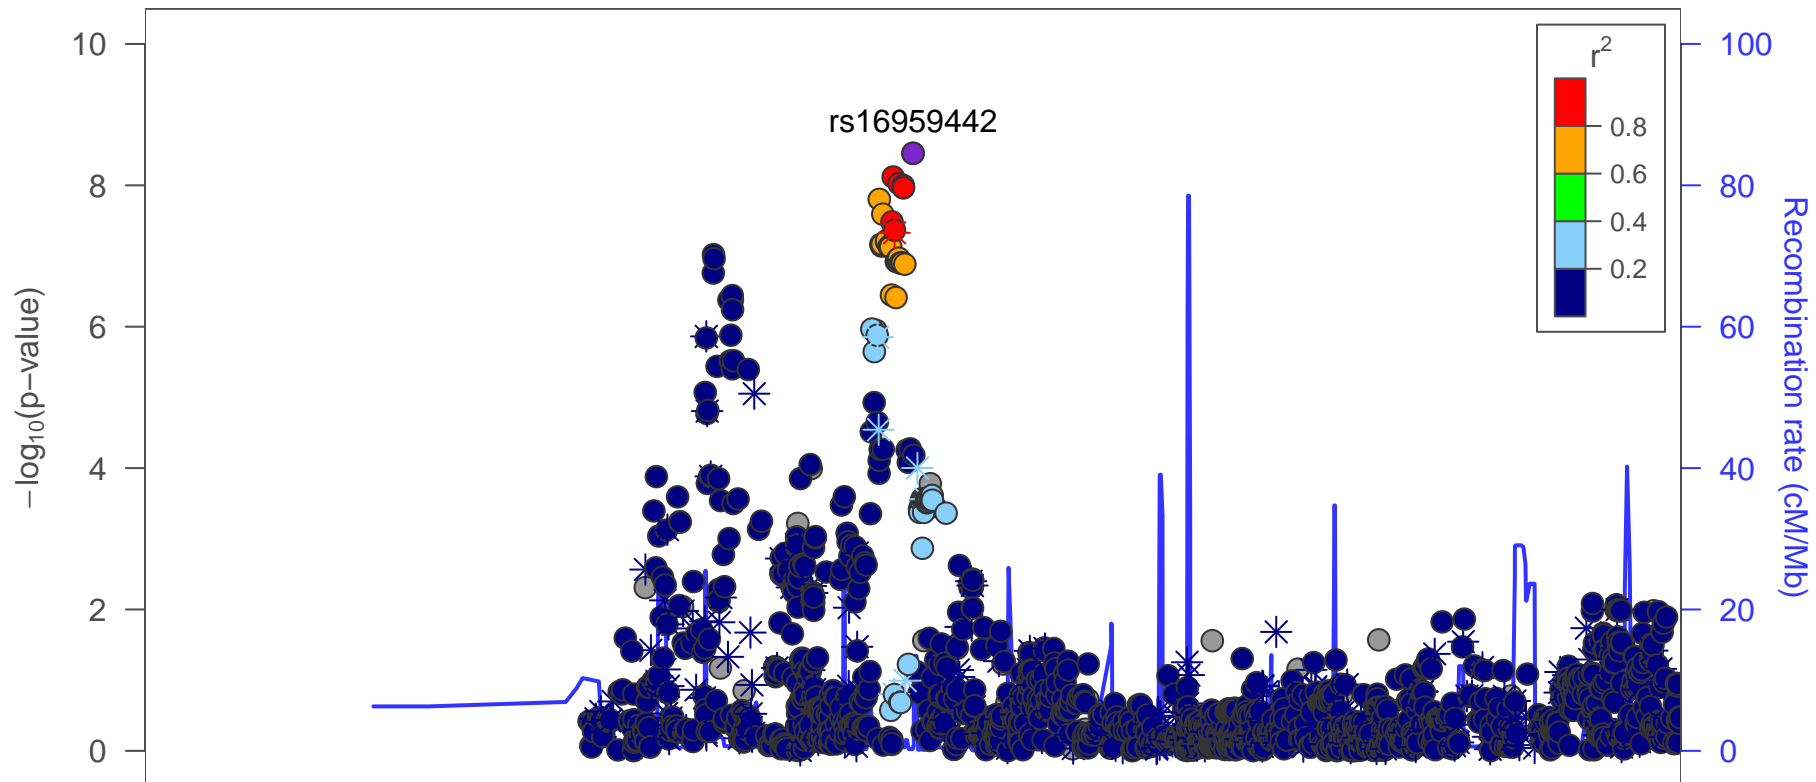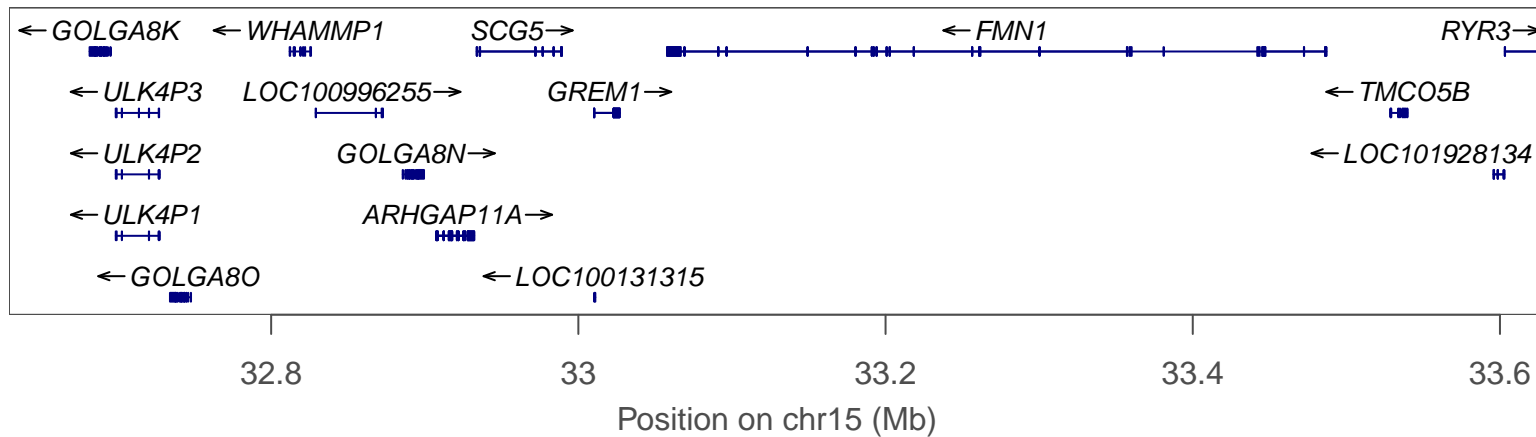

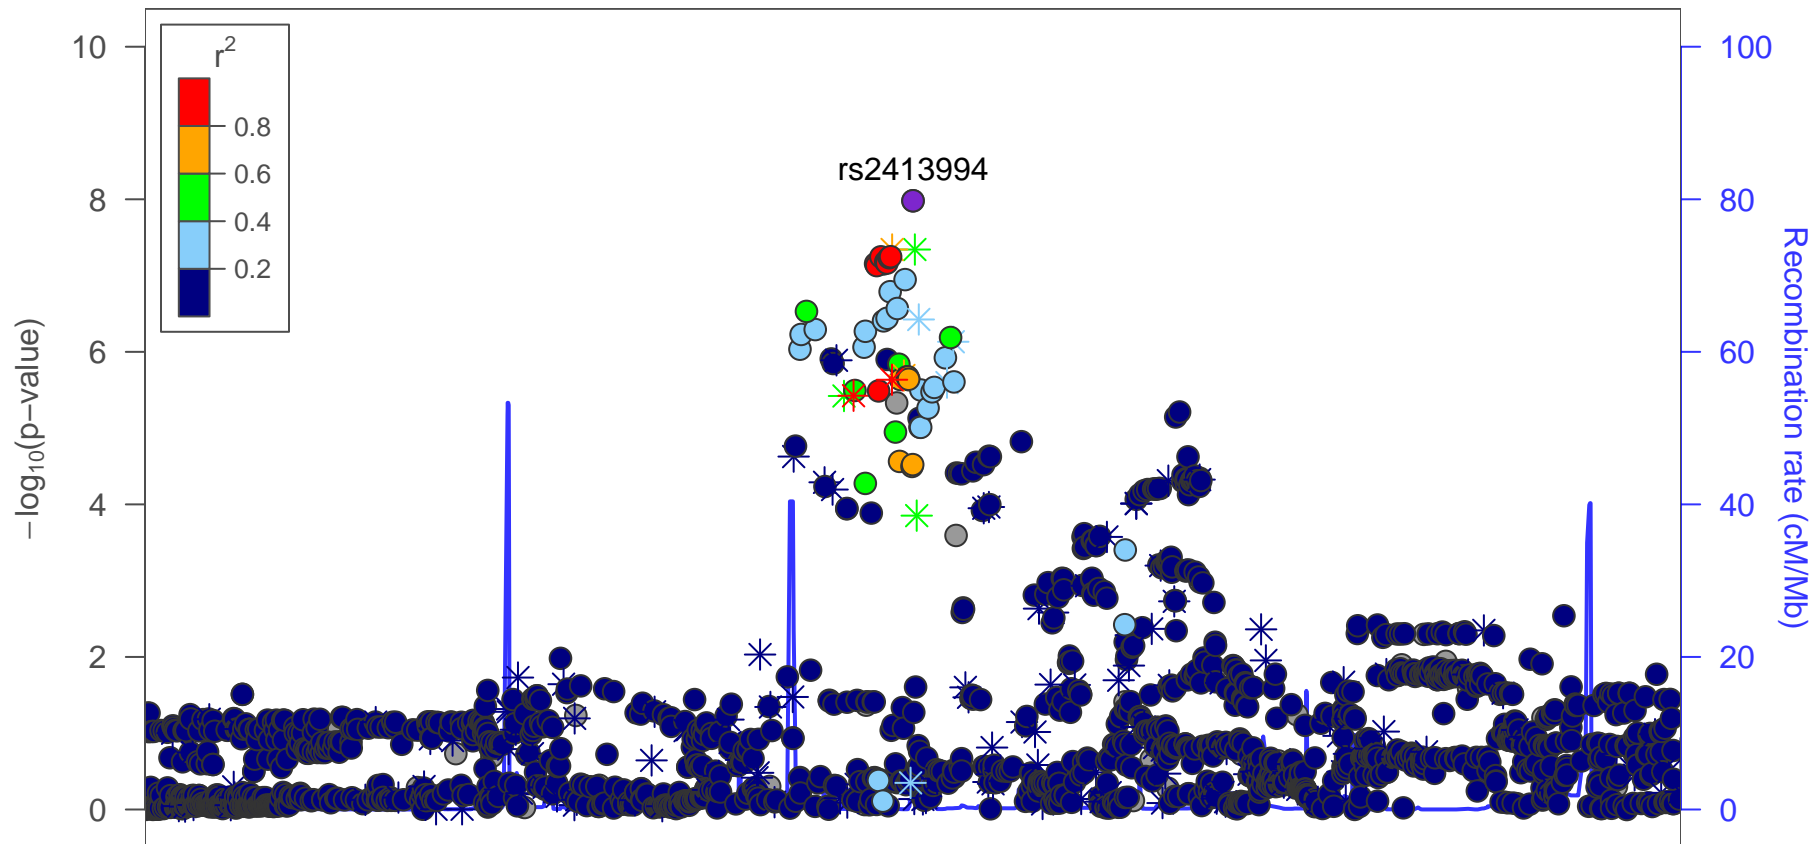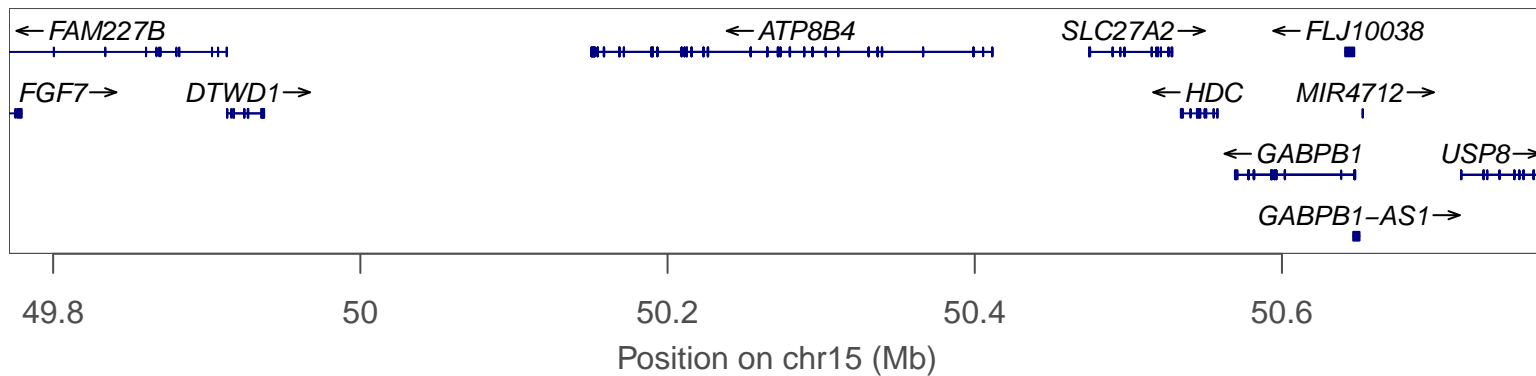

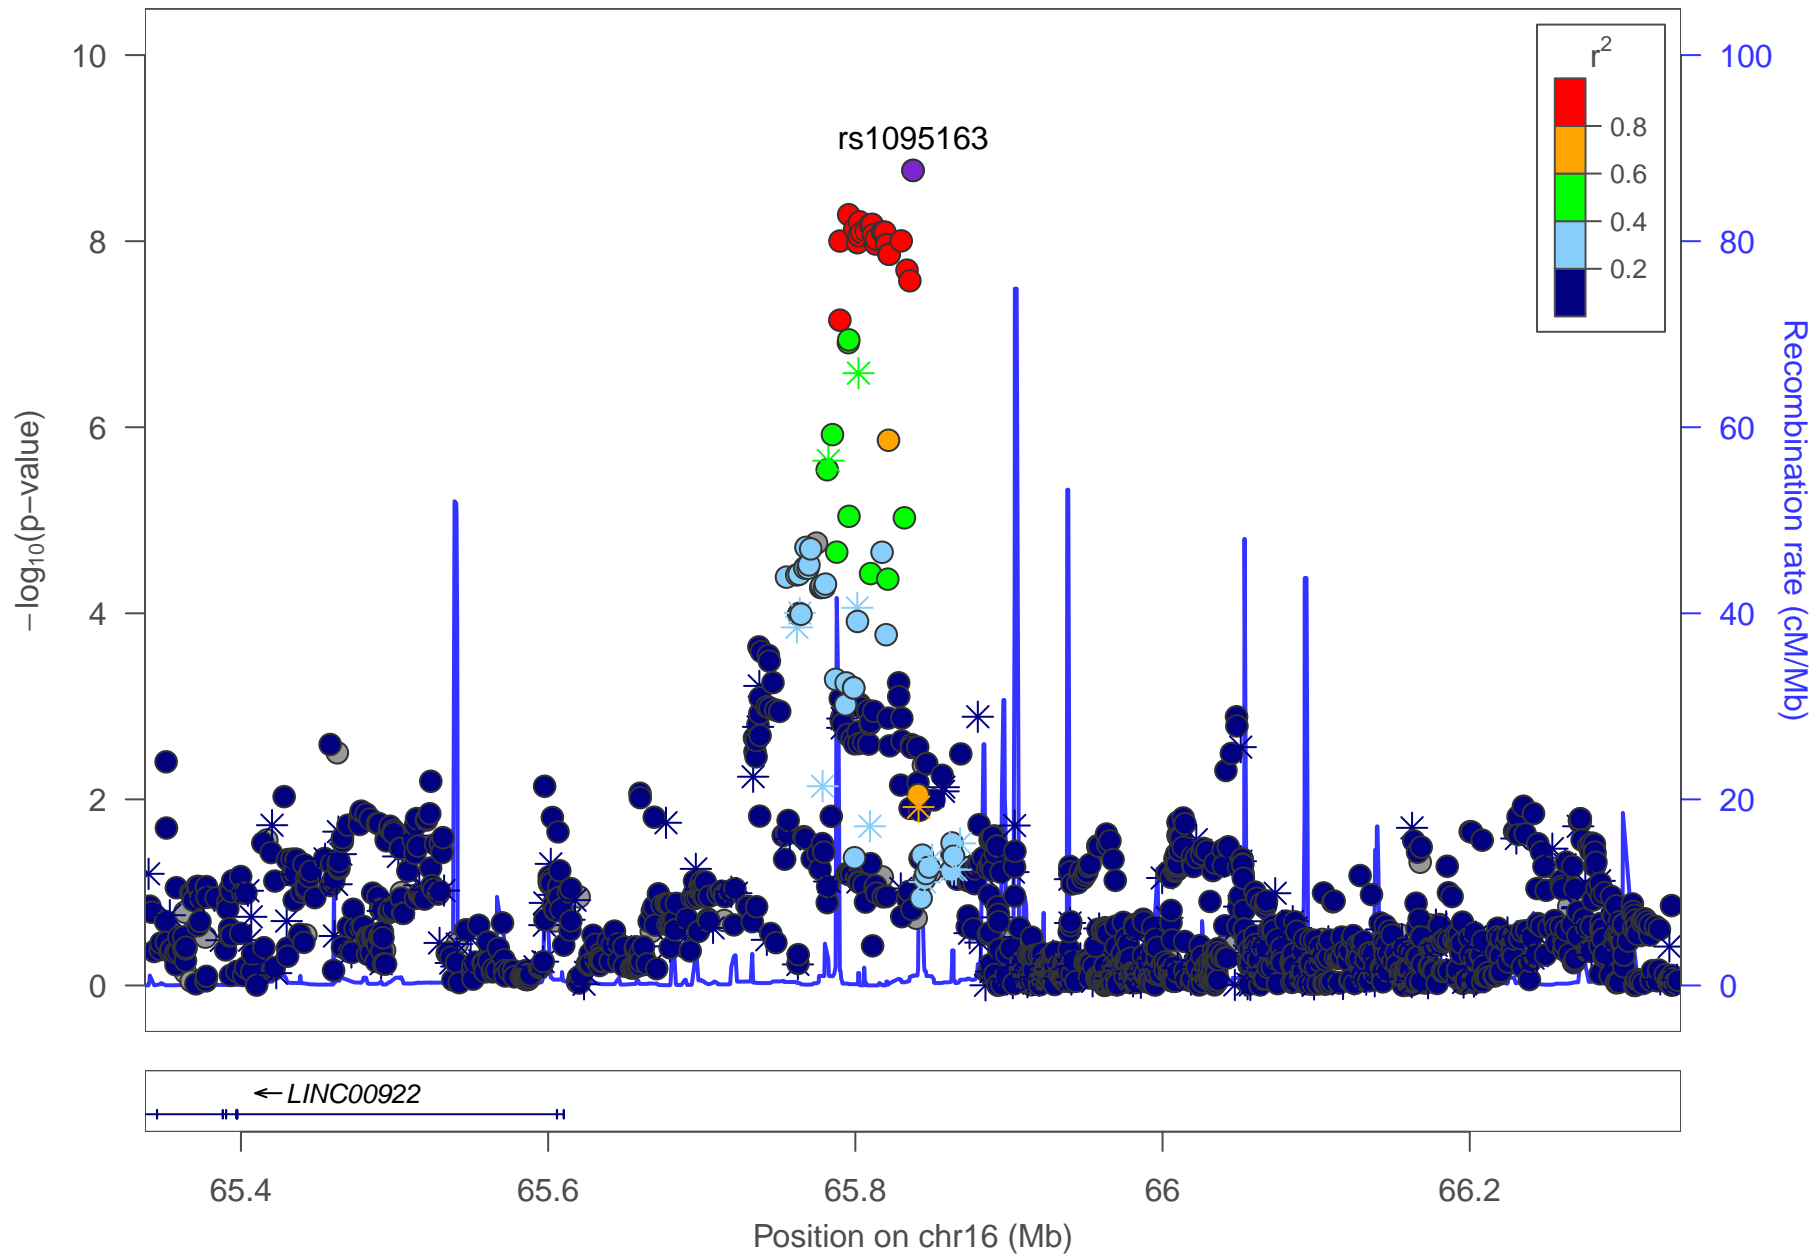

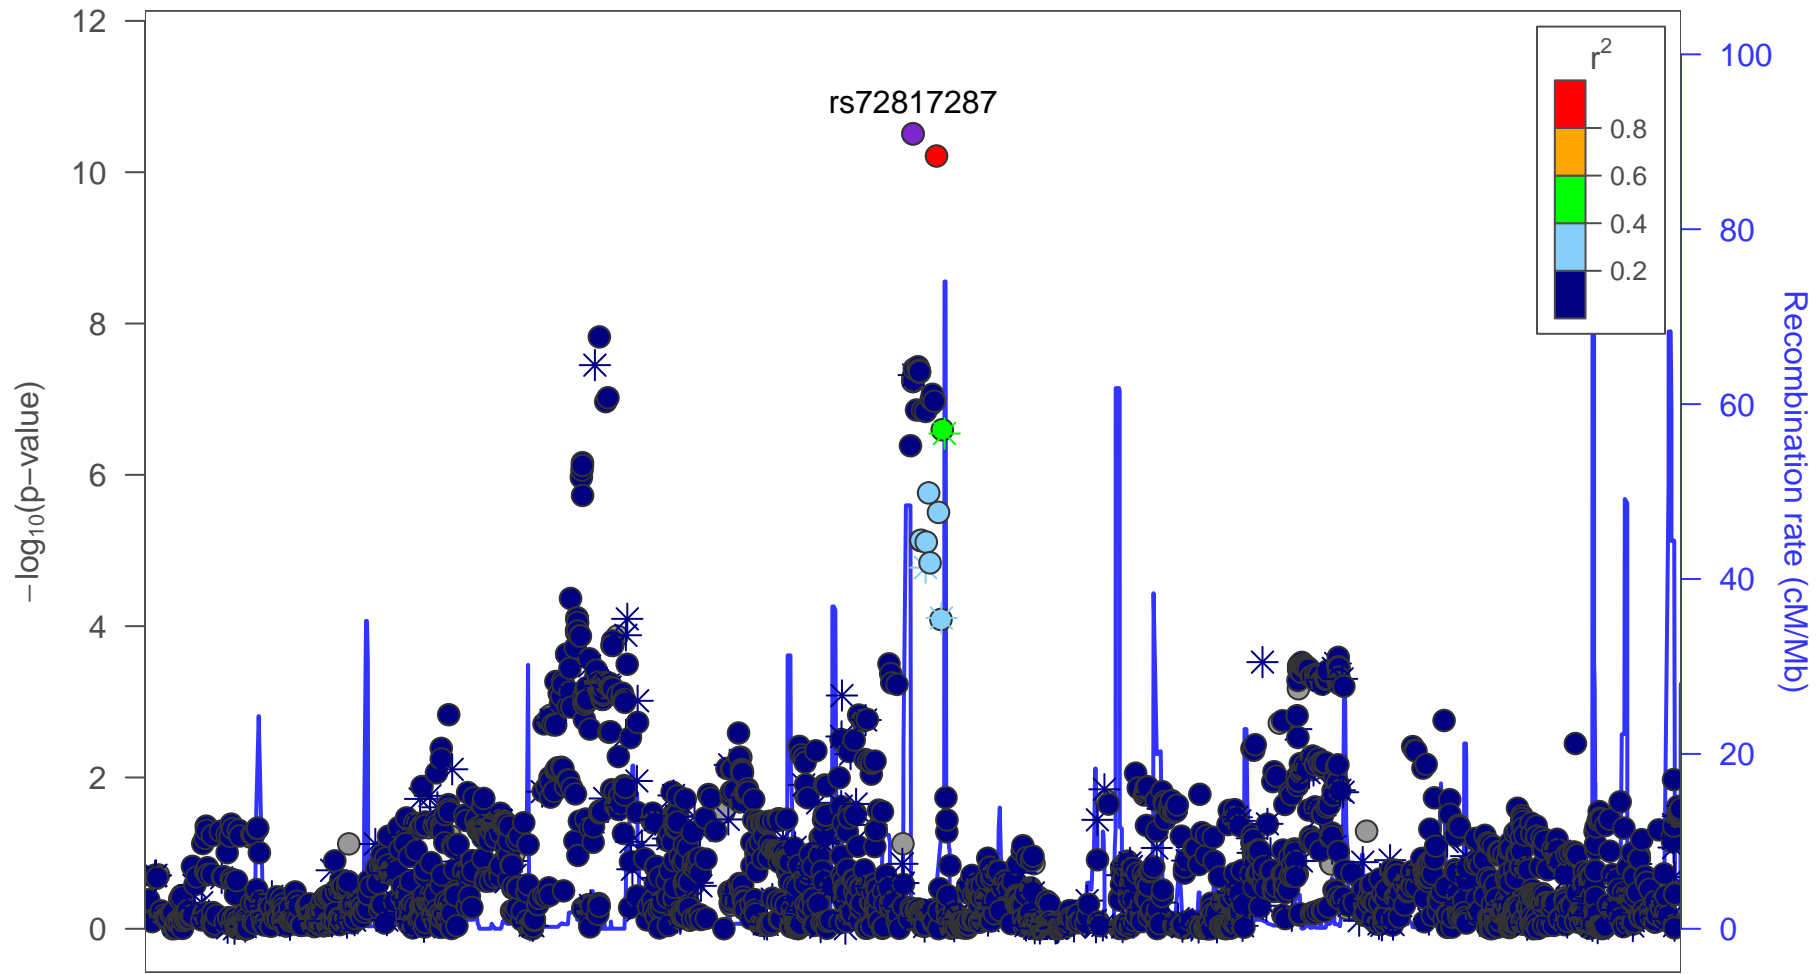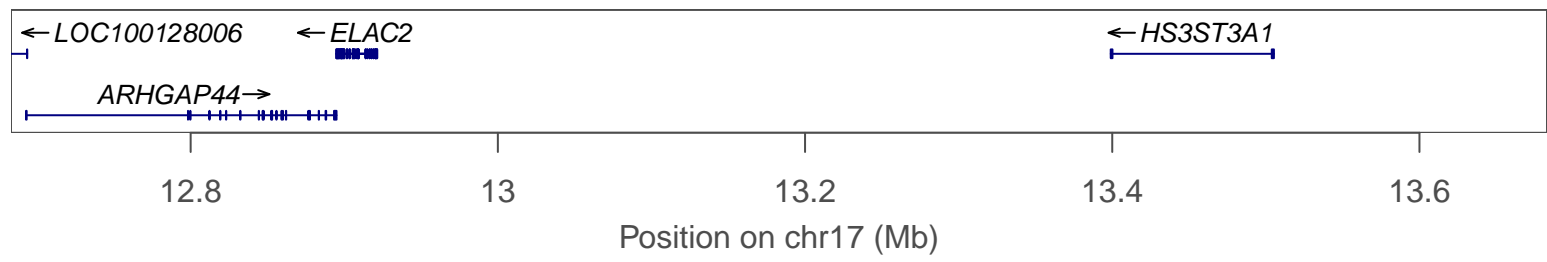

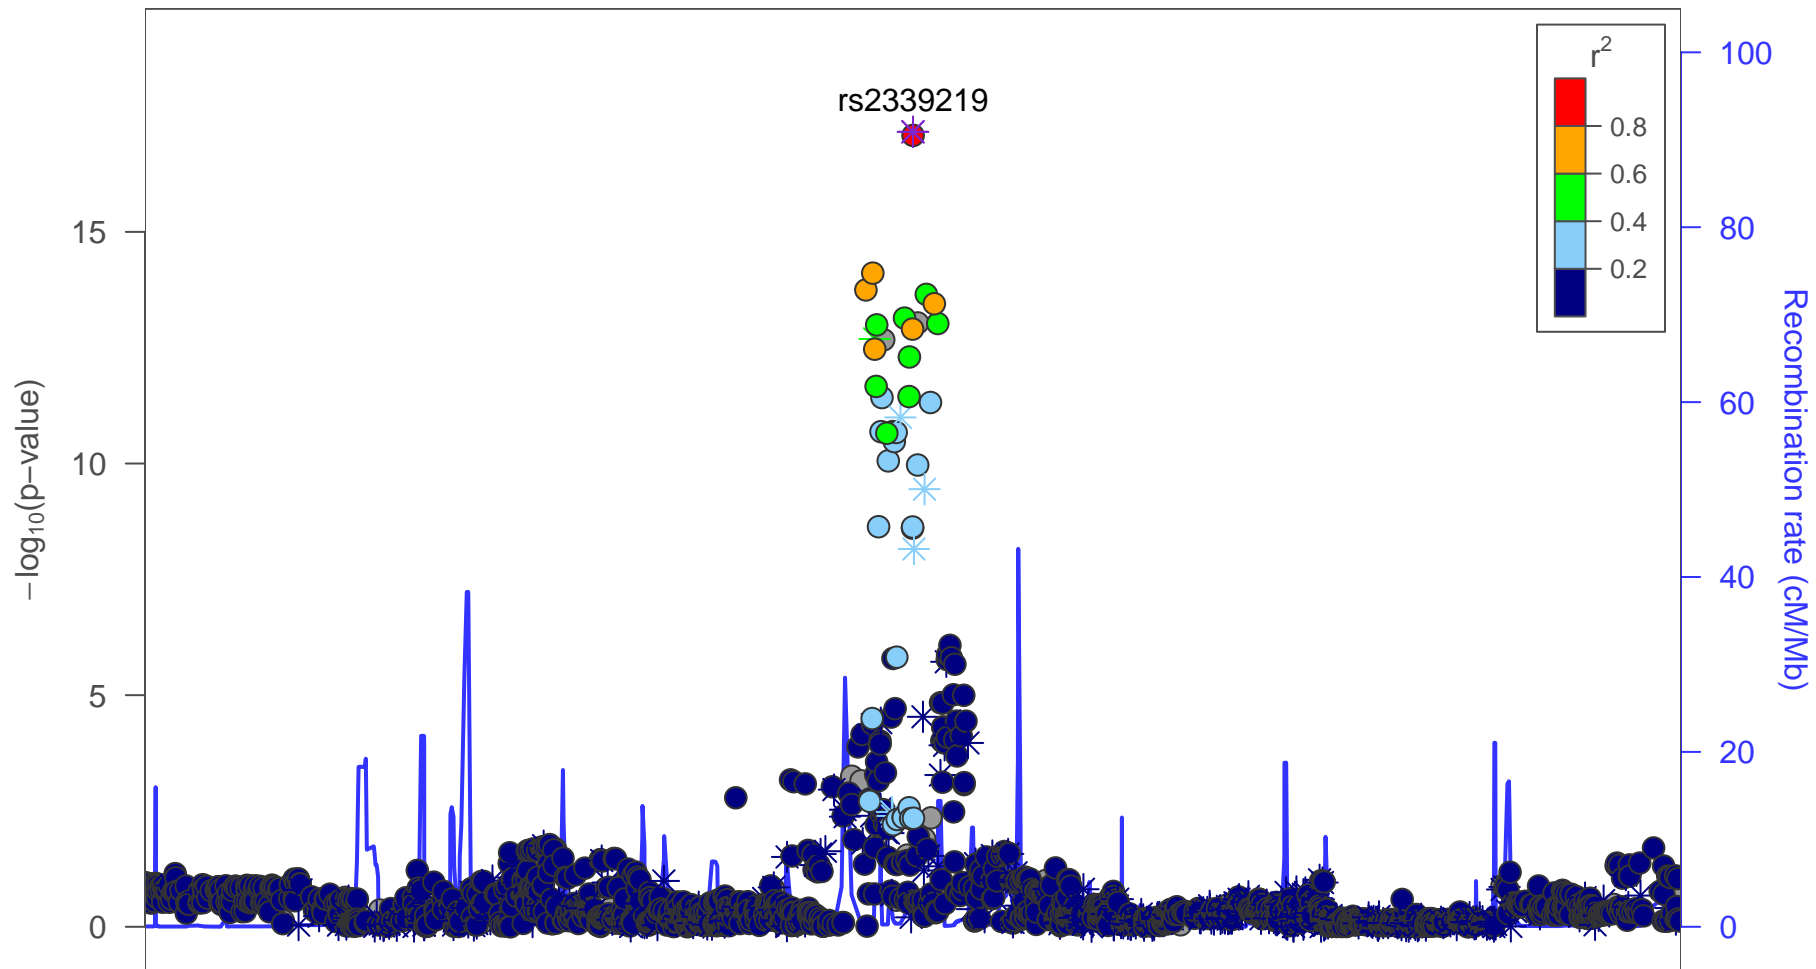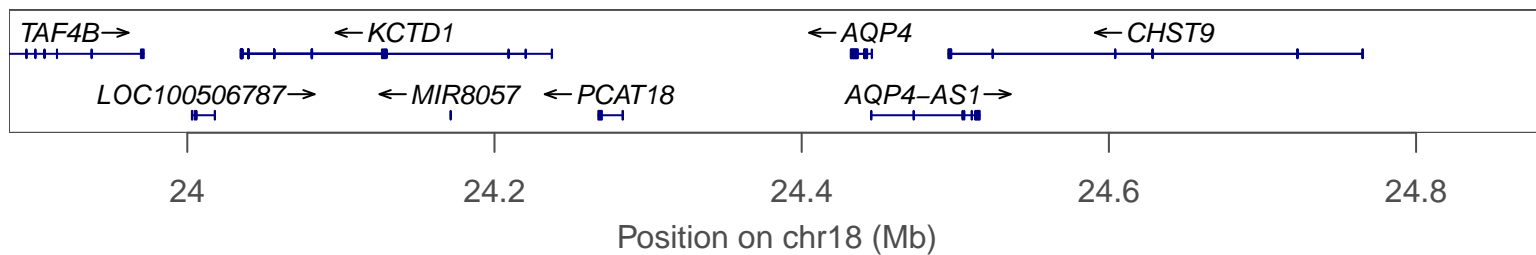



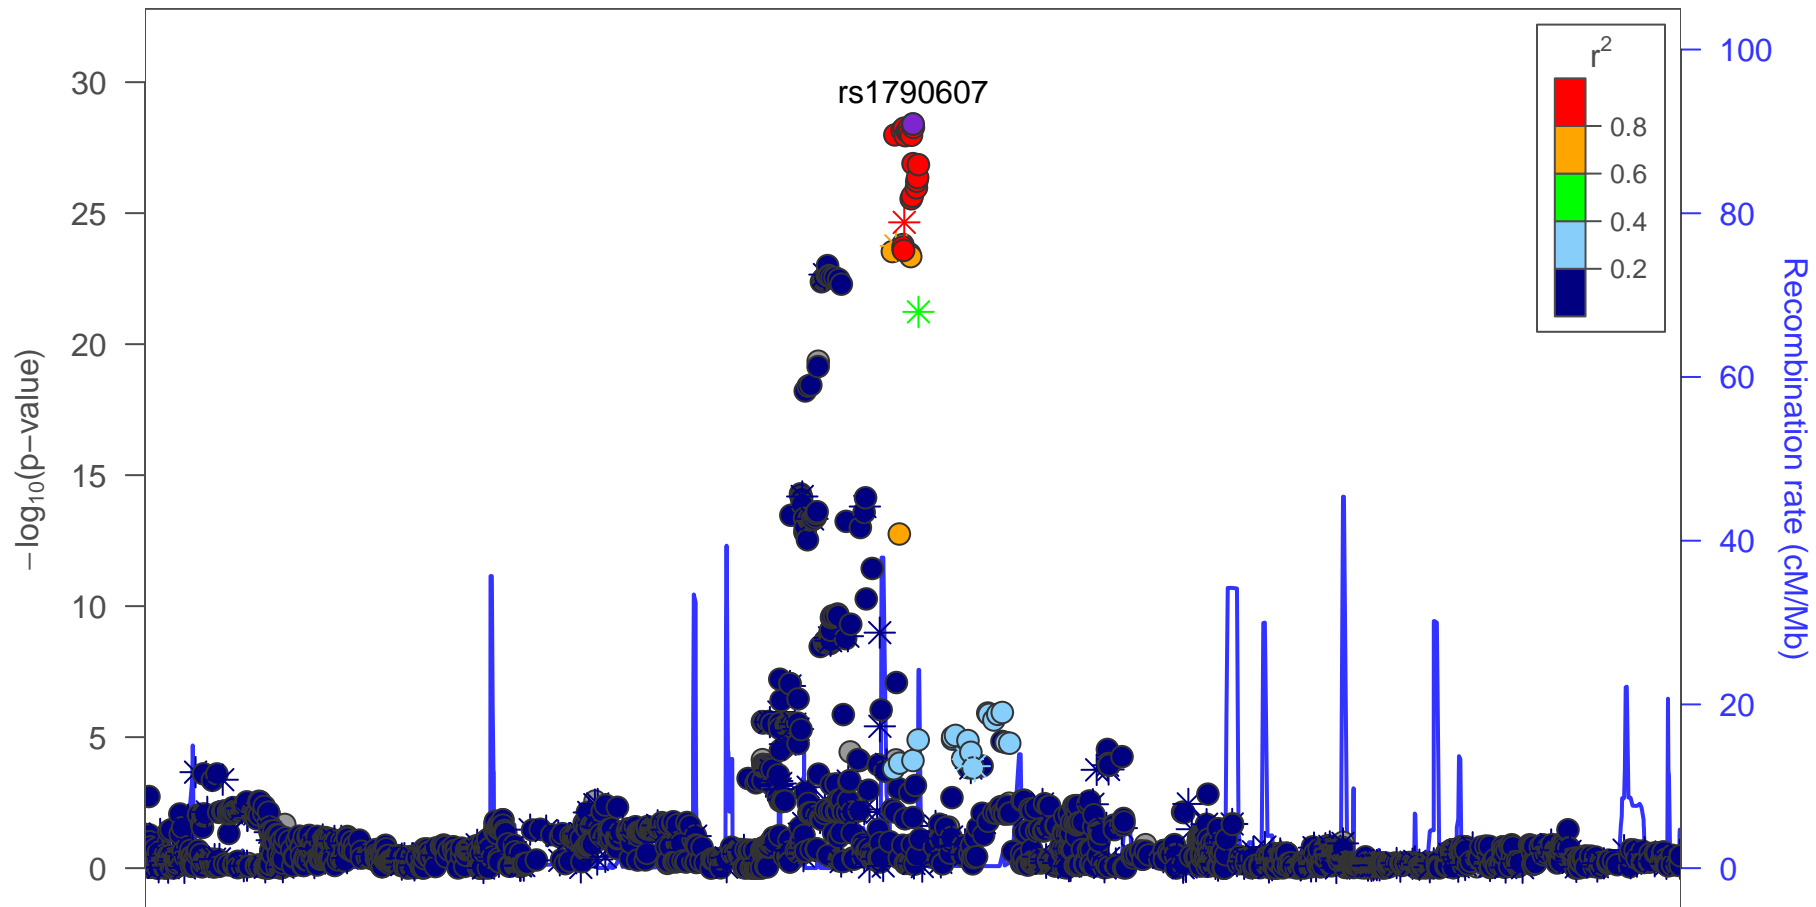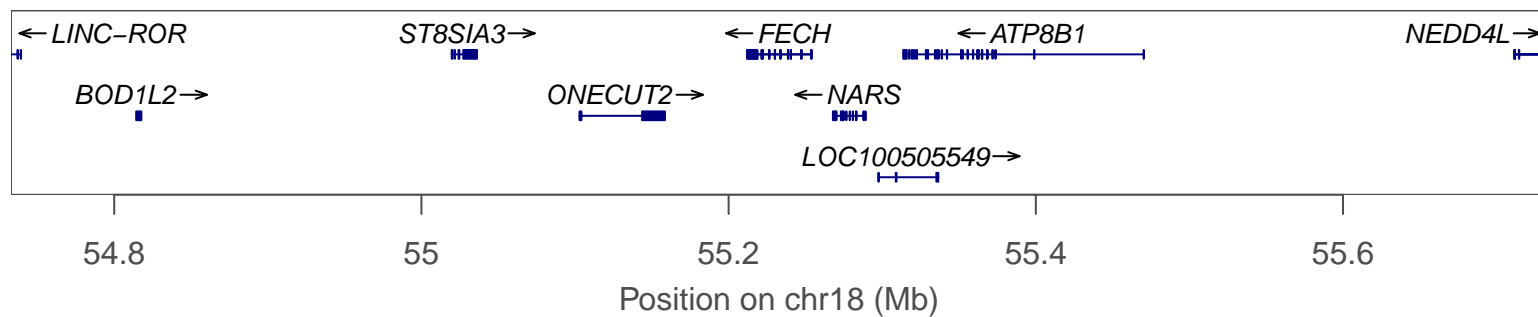

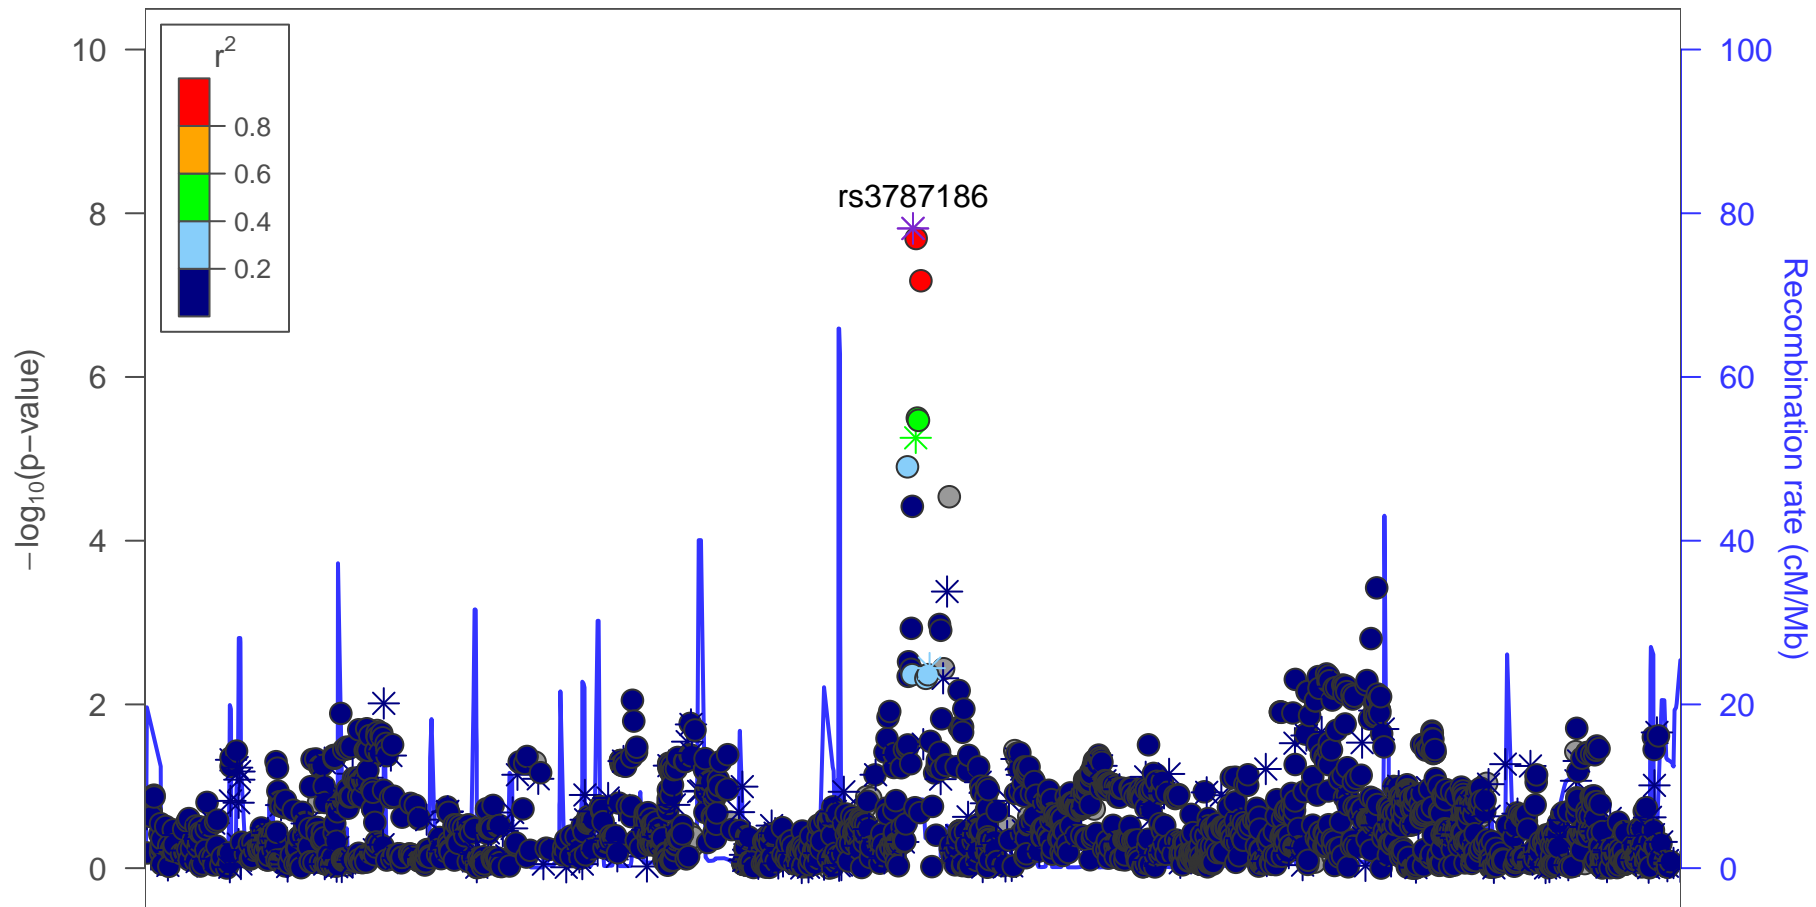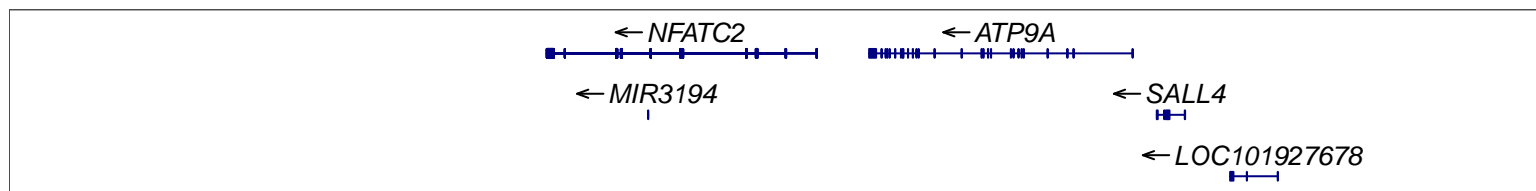

49.8

50

50.2

50.4

50.6

Position on chr20 (Mb)

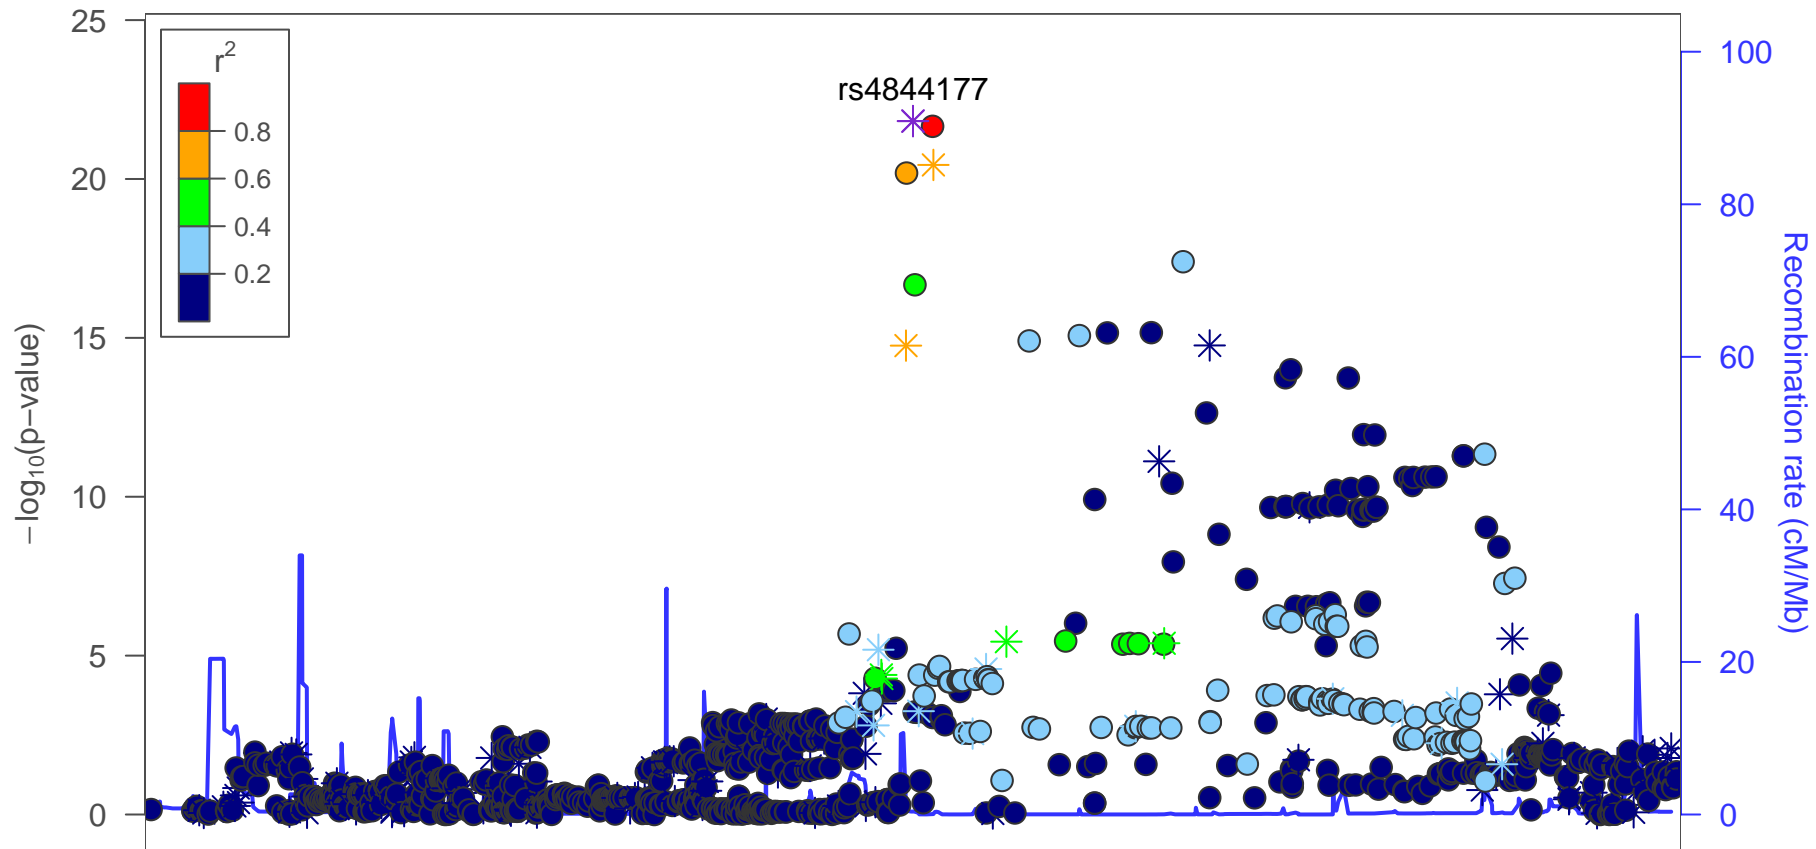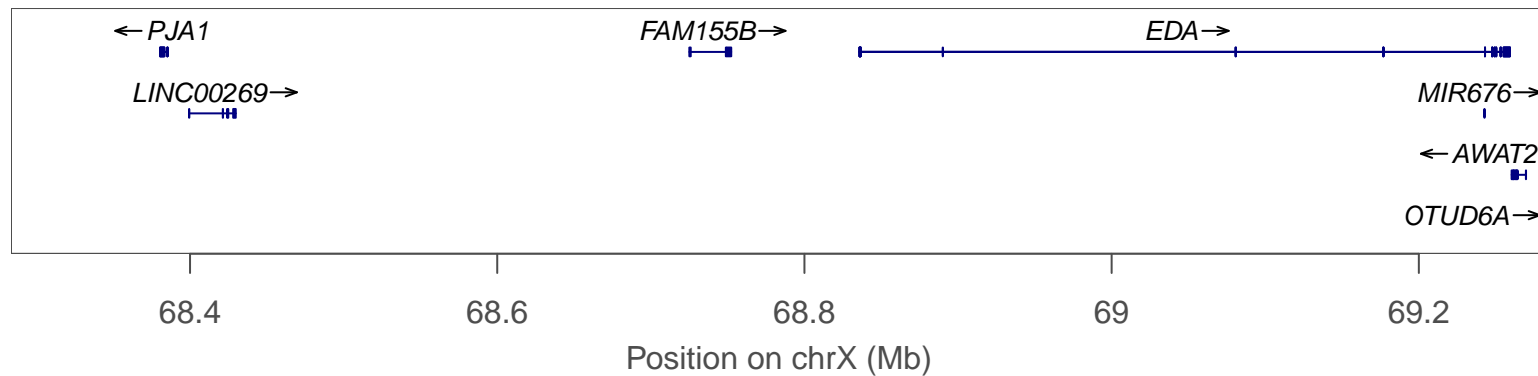

**Figure S2: Regional association plots** showing significant associations observed in the meta-analysis across all four cohorts.

### Human Phenotype

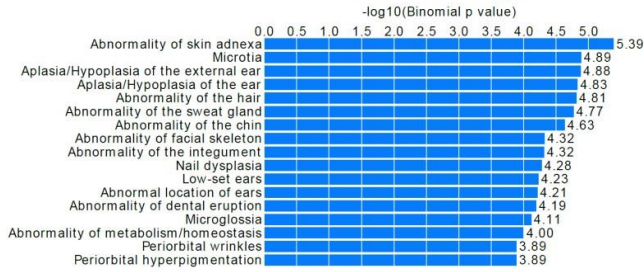

### Human Phenotype

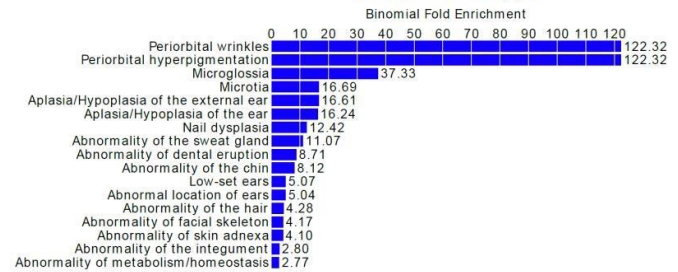

### GO Biological Process

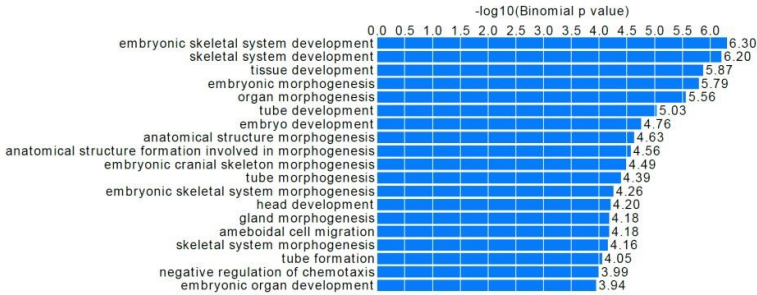

### GO Biological Process

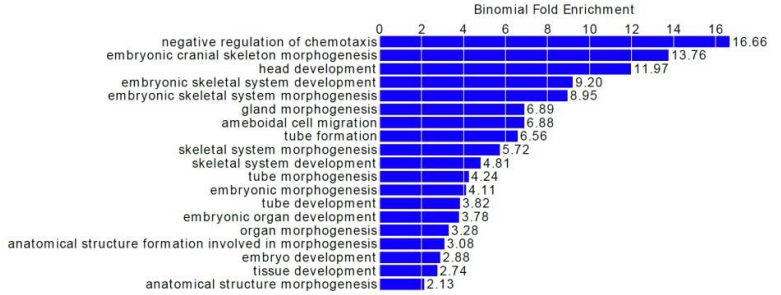

### Mouse Phenotype

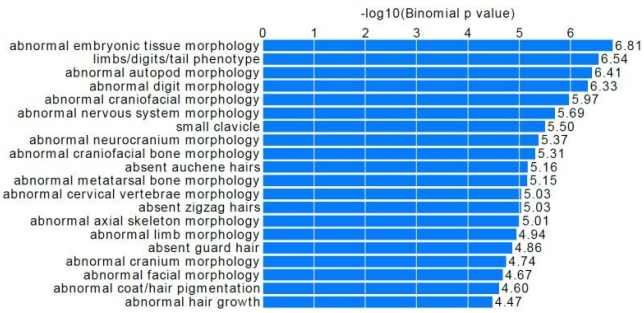

### Mouse Phenotype

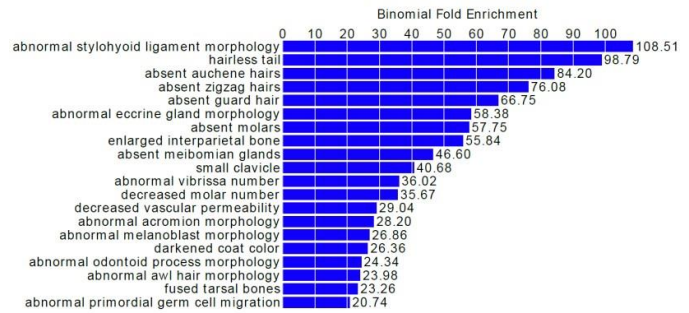

### MGI Expression: Detected

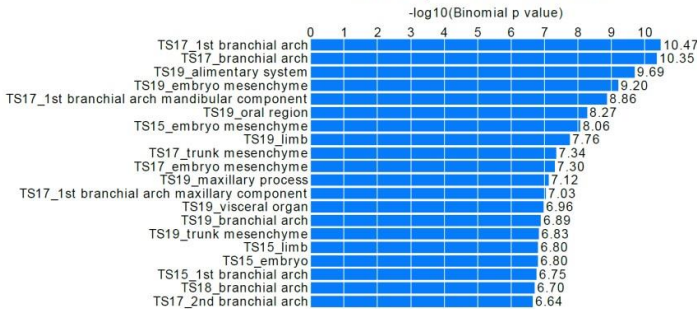

### MGI Expression: Detected

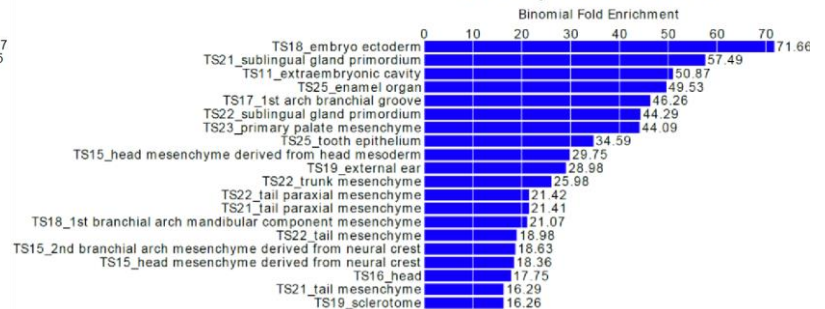

**Figure S3: Enrichment for annotation across ontologies for 91 genes (i.e., nearest two genes up to 1000kb from the lead SNP) across 49 loci identified in the meta-analysis across all four cohorts. From top to bottom: human phenotype, Gene Ontology (GO) biological processes, mouse phenotype, and MGI expression ontologies. Left: significant annotations ordered by  $-\log_{10}$ -transformed p-values (up to 20 shown). Right: significant annotations order by fold enrichment (up to 20 shown).**

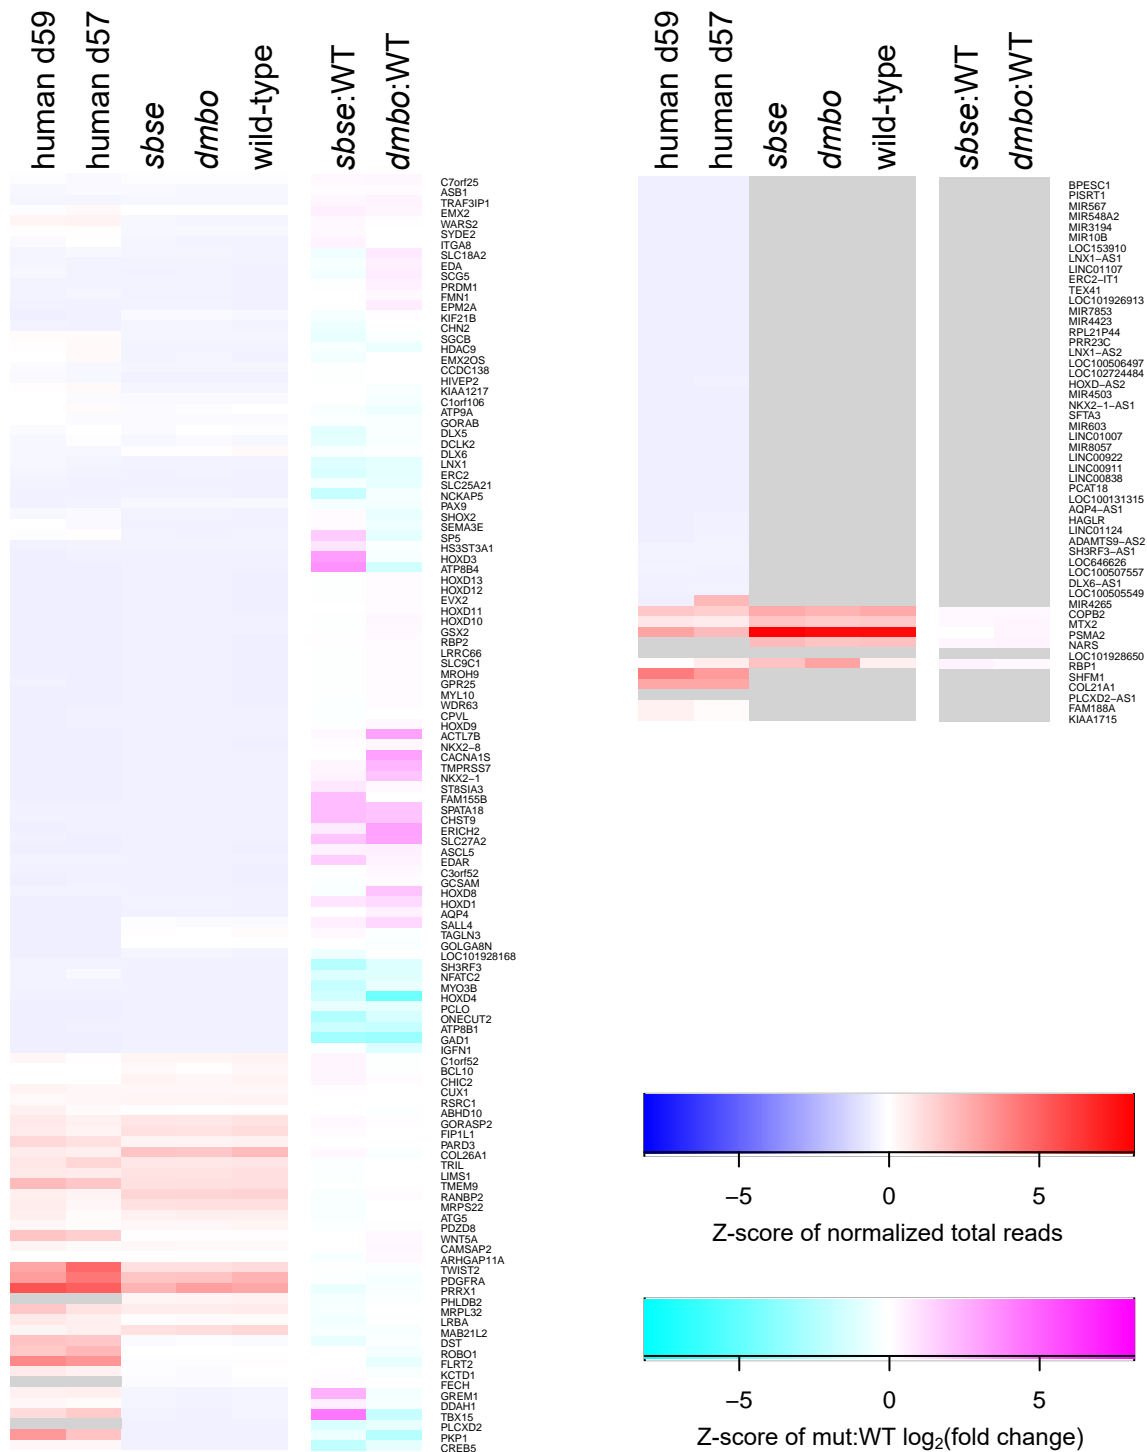

**Figure S4: Heatmaps of gene expression** in fetal human pinna (at days 59 and 57) and embryonic mouse second branchial arch tissue (in *sbse* mutants, *dmbo* mutants, and wild-type), and fold change of mutant mouse compared to wild-type mouse for 174 genes within 250 kb of the 49 lead SNPs observed in the genetic association meta-analysis across all cohorts. Genes are clustered by expression patterns with the bottom of the heatmap wrapping around to a second column. The shading scale is shown for Z-scores of expression and fold change. Genes for which expression data were not measured are shown in gray.

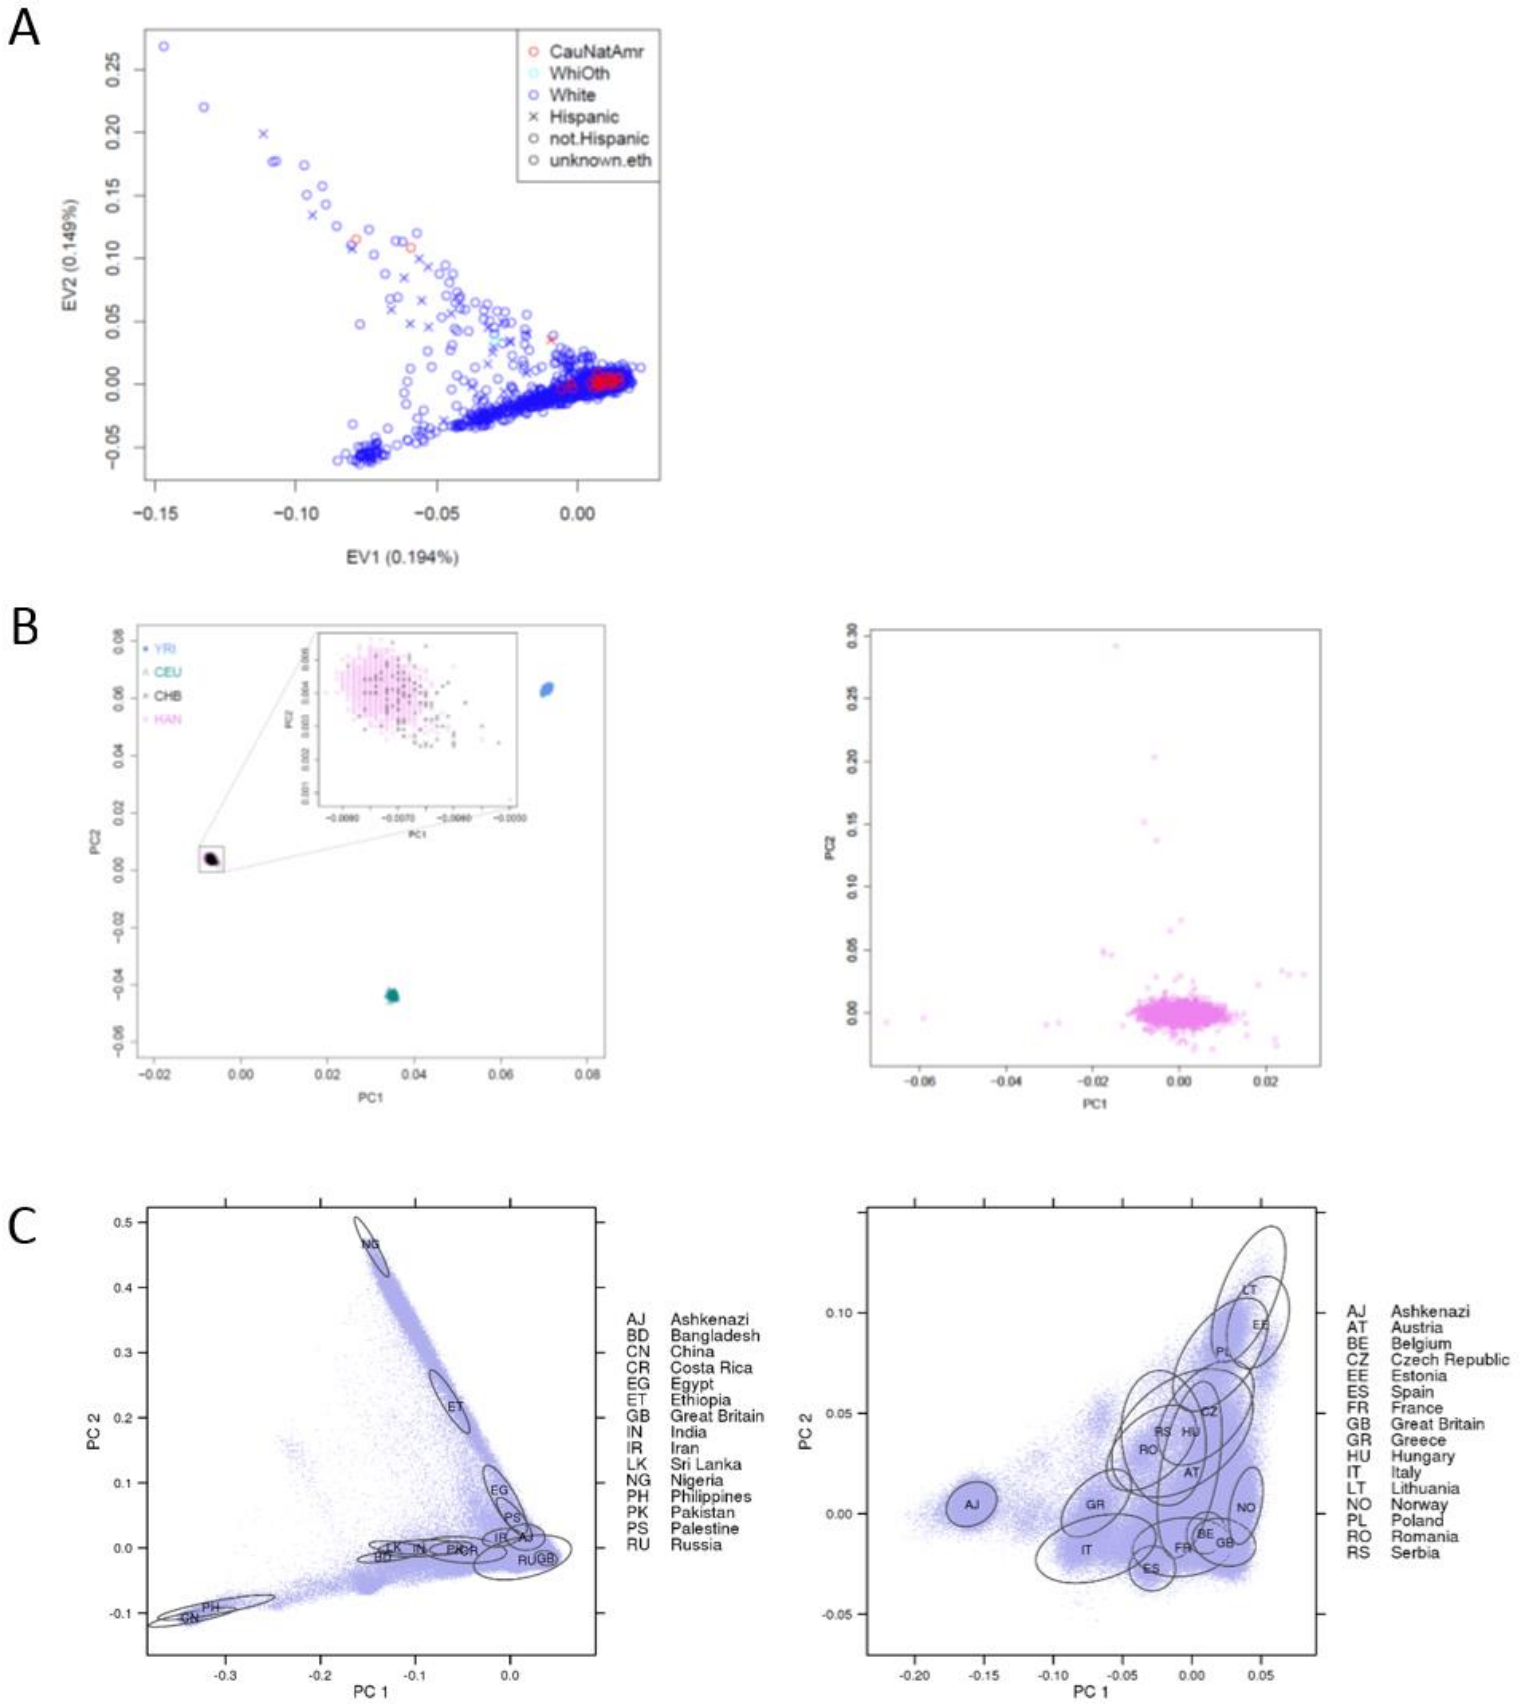

**Figure S5: Population structure** of cohorts is indicated by principal components of ancestry: (A) European American, (B) Chinese (left, with HapMap controls, right, analysis sample), and (C) 23andMe (left, entire sample, right, European American sample used in the analysis)

**Table S1: Characteristics of the cohorts**

|                                           | European American                | Latin American             | Chinese                       | 23andMe European ancestry                                |
|-------------------------------------------|----------------------------------|----------------------------|-------------------------------|----------------------------------------------------------|
| N                                         | 1,791                            | 5062                       | 2,857                         | 64,950                                                   |
| sex (% female)                            | 59.46                            | 52.7                       | 63.67                         | 51.01                                                    |
| age (mean [range])                        | 22.35 [3-40]                     | 24.4 [18 – 43]             | 56.14 [31-87]                 |                                                          |
| earlobe attachment (%)                    |                                  |                            |                               |                                                          |
| free                                      | 82.52                            | 11.7                       | 3.12                          | 73.75                                                    |
| partially attached                        | 9.94                             | 75.6                       | 31.92                         |                                                          |
| attached                                  | 7.54                             | 12.7                       | 64.96                         | 26.25                                                    |
| ancestry                                  | European                         | Admixed                    | East Asian                    | European                                                 |
| genotyping platform                       | Illumina HumanOmni Express+Exome | Illumina HumanOmni Express | Illumina HumanOmni Zhonghua-8 | Illumina HumanHap550, HumanOmni Express, or custom array |
| # genotyped SNPs passing QC               | 653,629                          | 671,772                    | 795,597                       | 1,044,759                                                |
| # imputed SNPs                            | 10,156,807                       | 9,143,600                  | 7,383,741                     | 15,573,758                                               |
| regression analysis                       | linear                           | linear                     | linear                        | logistic                                                 |
| covariates                                | Age, sex                         | age, sex, height, BMI      | age, sex, BMI                 | age, sex, genotyping platform                            |
| principal components of ancestry included | 3                                | 5                          | 0 <sup>a</sup>                | 5                                                        |
| genomic inflation factor                  | 0.994                            | 1.02                       | 1.037                         | 1.254 <sup>b</sup>                                       |

<sup>a</sup> Principal components analysis indicated negligible population structure, therefore no adjustments were made for principal components of ancestry in the Chinese sample.

<sup>b</sup> Genomic inflation for a subset of 1000 individuals with attached vs. 1000 with unattached earlobes was 1.002.



**Table S3: Genetic data quality control filtering criteria**

| <b>Filter</b>                                                     | <b>SNPs omitted</b> | <b>SNPs cumulatively retained</b> |
|-------------------------------------------------------------------|---------------------|-----------------------------------|
| European American                                                 |                     |                                   |
| None (all SNPs)                                                   |                     | 968,515                           |
| Technical filters                                                 | 8,470               | 960,045                           |
| Missing call rate $\geq 2\%$                                      | 9,675               | 950,370                           |
| >1 discordant calls in 69 duplicates <sup>a</sup>                 | 26                  | 950,344                           |
| >1 Mendelian error across 8 HapMap trios                          | 122                 | 950,222                           |
| HWE p-value $< 10^{-4}$                                           | 2,038               | 948,184                           |
| Allele frequency difference $\geq 0.2$ between sexes <sup>b</sup> | 274                 | 947,910                           |
| Heterozygosity difference $\geq 0.3$ between sexes <sup>b</sup>   | 41                  | 947,869                           |
| Positional duplicates                                             | 19,597              | 928,272                           |
| Monomorphic (MAF = 0)                                             | 108,485             | 819,787                           |
| MAF $< 0.01$                                                      | 164,959             | 654,828                           |
| non-autosomal or X                                                | 1,199               | 653,629                           |
| Latin American                                                    |                     |                                   |
| None (all SNPs)                                                   |                     | 730,525                           |
| Chromosome 0 (SNPs without assigned location)                     | 1230                | 729,295                           |
| Missing call rate $\geq 5\%$                                      | 3550                | 725,745                           |
| MAF $< 0.01$ (includes monomorphic)                               | 53973               | 671,772                           |
| Chinese cohort                                                    |                     |                                   |
| None (all SNPs)                                                   |                     | 887,270                           |
| Technical filters                                                 | 278                 | 886,992                           |
| Missing call rate $\geq 2\%$                                      | 18,628              | 868,364                           |
| Minor Allele Frequency $< 0.01$                                   | 67,873              | 800,491                           |
| HWE p-value $< 10^{-3}$                                           | 2,588               | 797,903                           |
| Positional duplicates                                             | 2,306               | 795,597                           |

<sup>a</sup> one duplicate was removed from QC filters due to a chromosomal anomaly

<sup>b</sup> filter applied to SNPs on autosomes and XY pseudo-autosomal region

**Table S4: Summary of imputation methods and quality control filters**

|                                                                                         | <b>European American</b>              | <b>Latin American</b>                              | <b>Chinese</b>                  | <b>23andMe</b>                                 |
|-----------------------------------------------------------------------------------------|---------------------------------------|----------------------------------------------------|---------------------------------|------------------------------------------------|
| Reference data source                                                                   | 1000 Genomes<br>Project Phase 3       | 1000 Genomes<br>Project Phase 1                    | 1000 Genomes<br>Project Phase 3 | 1000 Genomes<br>Project Phase 1<br>custom tool |
| Pre-phasing                                                                             | SHAPEIT2                              | SHAPEIT2                                           | SHAPEIT2                        | based on BEAGLE                                |
| Imputation                                                                              | IMPUTE2<br>masked variant<br>analysis | IMPUTE2<br>masked variant<br>analysis <sup>0</sup> | IMPUTE2                         | Minimac2                                       |
| Other quality control procedures                                                        |                                       |                                                    | -                               | -                                              |
| Imputation filters                                                                      |                                       |                                                    |                                 |                                                |
| genotype probability (per SNP<br>per person)                                            | > 0.9                                 | > 0.8                                              | > 0.9                           | -                                              |
| INFO score (per SNP)                                                                    | > 0.5                                 | > 0.4                                              | > 0.6                           | -                                              |
| MAF                                                                                     | > 0.01                                | > 0.01                                             | > 0.02                          | -                                              |
| Missing rate                                                                            | -                                     | -                                                  | < 0.05                          | -                                              |
| HWE                                                                                     | -                                     | -                                                  | ≥ 10e-6                         | -                                              |
| concordance (concord_type <sup>0</sup> )<br>for masked variant analysis                 | -                                     | > 0.7                                              | -                               | -                                              |
| info_type <sup>0</sup> -concord_type <sup>0</sup><br>(chip genotype quality<br>measure) | -                                     | > 0.1                                              | -                               | -                                              |
